# Supplementary material for: Decreasing mercury levels in consumer fish over the three decades of increasing mercury emissions in China
Source: PubMed Central journal article supplement — Eco Environ Health. 2022 May 9;1(1):46–52. doi: 10.1016/j.eehl.2022.04.002 (PMC10702889; doi:10.1016/j.eehl.2022.04.002), 2022-05-09
Supplement: mmc1.pdf [file mmc1.pdf]

---

Supplementary Material for:

## Decreasing mercury levels in consumer fish over the three decades of increasing mercury emissions in China

Hua Zhang,<sup>†,‡,\*</sup> Wen-Xiong Wang<sup>§</sup>, Che-Jen Lin,<sup>†,#</sup> Xin-Bin Feng<sup>†</sup>, Jianbo Shi,<sup>//,\*</sup> Gui-Bin Jiang,<sup>//</sup> and Thorjørn Larssen<sup>‡</sup>

<sup>†</sup> State Key Laboratory of Environmental Geochemistry, Institute of Geochemistry, Chinese Academy of Sciences, Guiyang, 550081, China.

<sup>‡</sup> Norwegian Institute for Water Research, Gaustadalleen 21, 0349 Oslo, Norway.

<sup>§</sup> School of Energy and Environment and State Key Laboratory of Marine Pollution, City University of Hong Kong, Kowloon, Hong Kong, China

<sup>#</sup> Center for Advances in Water and Air Quality, Lamar University, Beaumont, TX, USA

<sup>//</sup> State Key Laboratory of Environmental Chemistry and Ecotoxicology, Research Center for Eco-Environmental Sciences, Chinese Academy of Sciences, Beijing, 100085, China.

<sup>\*</sup> State Environmental Protection Key Laboratory of Source Apportionment and Control of Aquatic Pollution, School of Environmental Studies, China University of Geosciences, Wuhan 430074, China

### Corresponding Author

\*zhanghua@mail.gyig.ac.cn (H.Z.)

This PDF file includes:

Figs. S1 to S11

Tables S1 to S5

A list of the content in this Supplementary Material follows:

**Figure S1** Temporal trend and spatial distribution of atmospheric mercury emissions in China.

**Figures S2-S10.** Concentrations of mercury in fish samples in different basins in China.

**Figure S11.** Historical trends of production, trophic diversity, and body size of fish and their relationships with total mercury in fish in China.

**Table S1.** A summary of the temporal variation in total mercury levels in the muscle tissues of fish samples (mg.kg<sup>-1</sup>; ww) in China during 1980-2014.

**Table S2.** Total Hg concentrations in the muscle tissues of fish samples (mg kg<sup>-1</sup>; ww) from 34 different administrative regions in China.

**Table S3.** Concentrations of mercury in the muscle tissue of fish samples collected from the coastal waters, the seven basins of China, and the remaining mainland area (mainland area except for the seven basins), as well as fish types, feeding habits, number of species/samples, sampling years, and analysis methods.

**Table S4.** A list of fish species' names in the Chinese aquatic ecosystems.

**Table S5.** Lifespan of fish in China from the samples reported from the literature.

**Table S6.** Concentrations of mercury in Chinese seawater and freshwater.

**Table S7.** Concentrations of mercury in Chinese sediments.

**Figure S1** Temporal trend and spatial distribution of atmospheric mercury emissions in China [*Upper figure: the temporal variations of Hg emission trend by sector in China during; lower figure: the spatial distribution of atmospheric Hg emissions in China; cited from Wu, Q., et al., 2016. Env Sci & Technol 2016, 50, 13428-13435*].

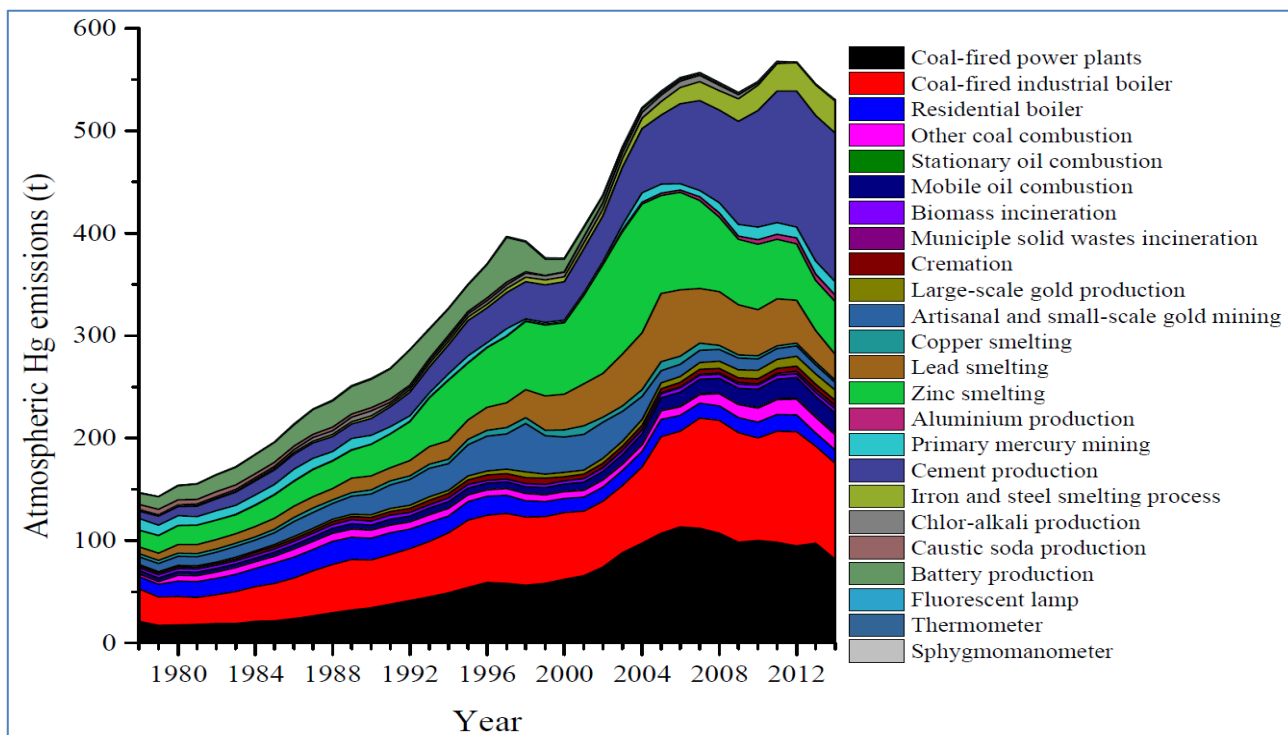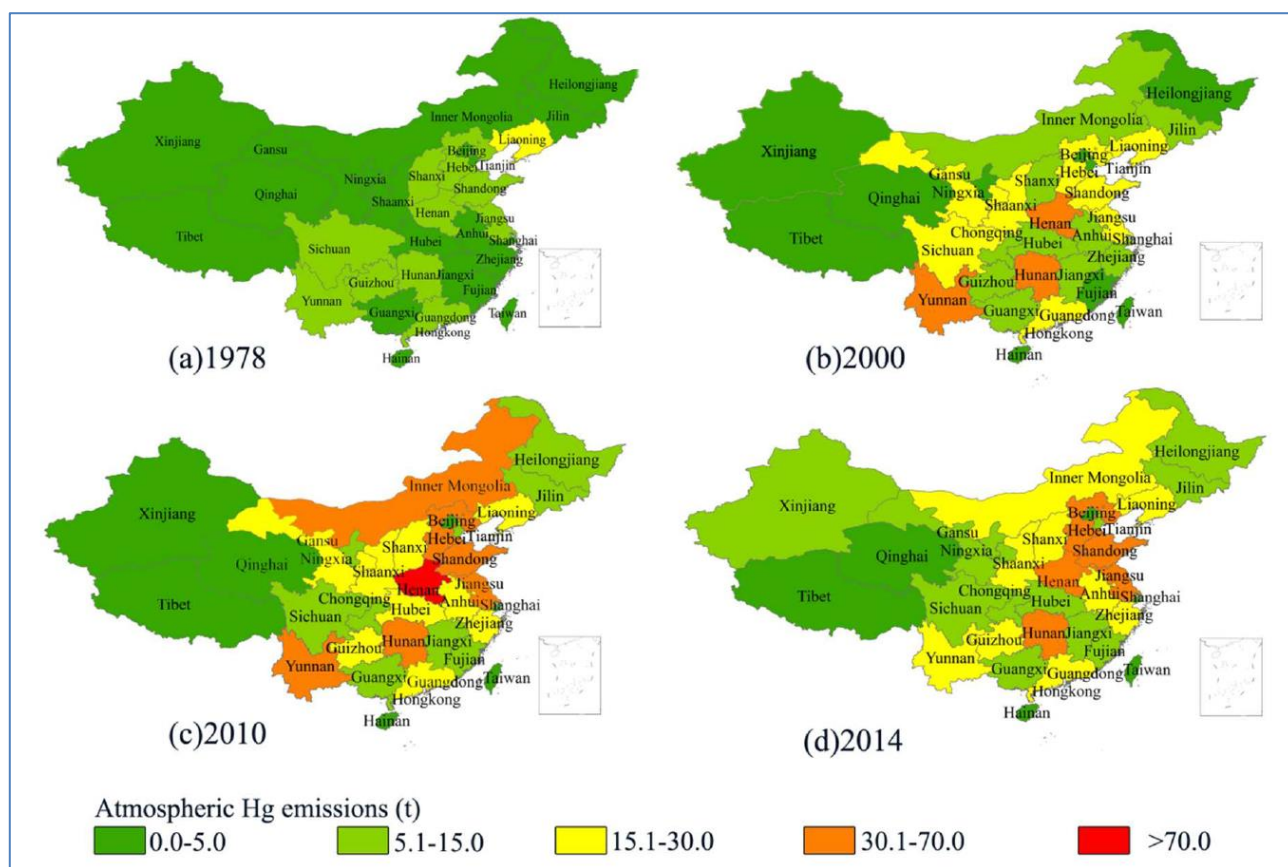

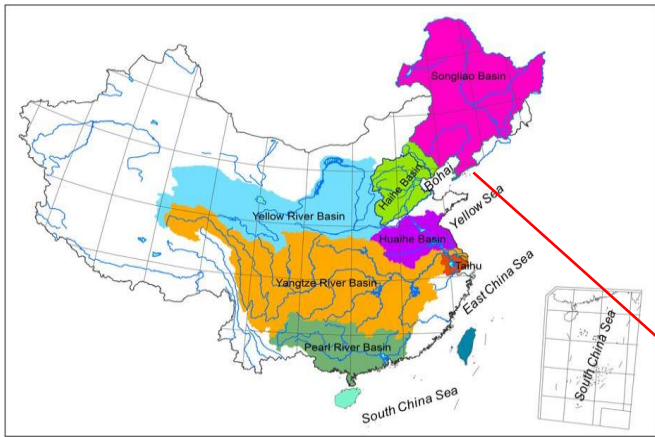

**Figure S2** Concentrations of total mercury in the muscle tissues of fish samples from the Bohai Sea and the Yellow Sea from 1980 to 2014 according to the data in Table S3. The left map shows the location of the study area. For the right figure, the left side and the right side show the locations and number, respectively, of fish species/samples, fish types, feeding habits, and sampling years. The bottom side represents the concentrations of total mercury in muscle tissues of fish samples. The top side shows the abbreviations for the fish types and feeding habits, where W/F indicates the wild/farmed species and f/m indicates the freshwater/marine species. C/O/H/P indicates, respectively, carnivorous, omnivorous, herbivorous, and planktivorous species.

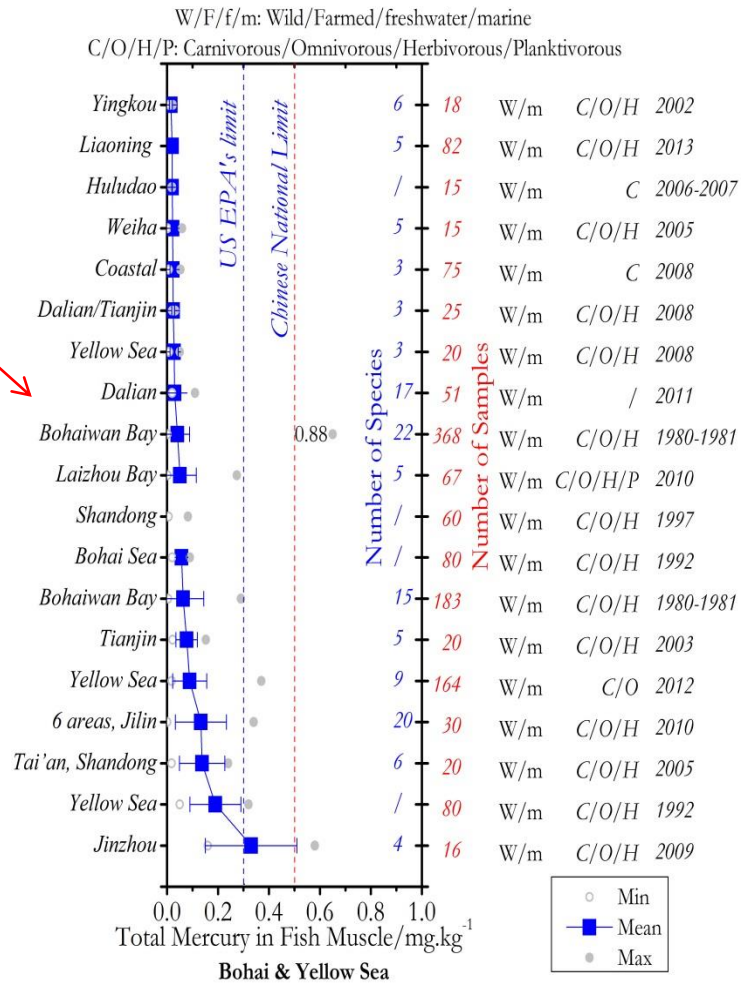

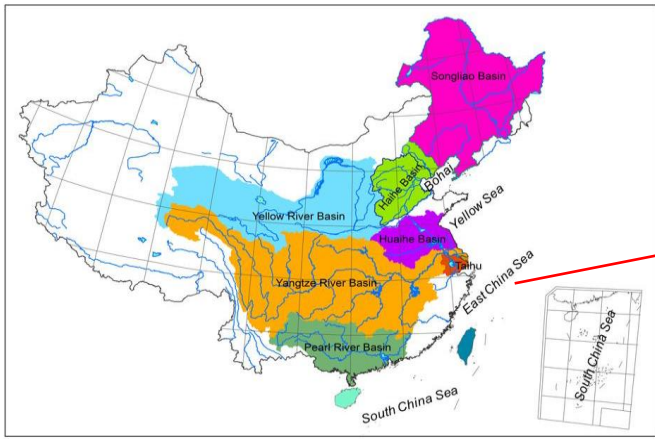

**Figure S3** Concentrations of total mercury in the muscle tissues of fish samples from the East China Sea from 1980 to 2014 according to the data in Table S3. The left map shows the location of the study area. For the right figure, the left side and the right side show the locations and number, respectively, of fish species/samples, fish types, feeding habits, and sampling years. The bottom side represents the concentrations of total mercury in muscle tissues of fish samples. The top side shows the abbreviations for the fish types and feeding habits, where W/F indicates the wild/farmed species and f/m indicates the freshwater/marine species. C/O/H/P indicates, respectively, carnivorous, omnivorous, herbivorous, and planktivorous species.

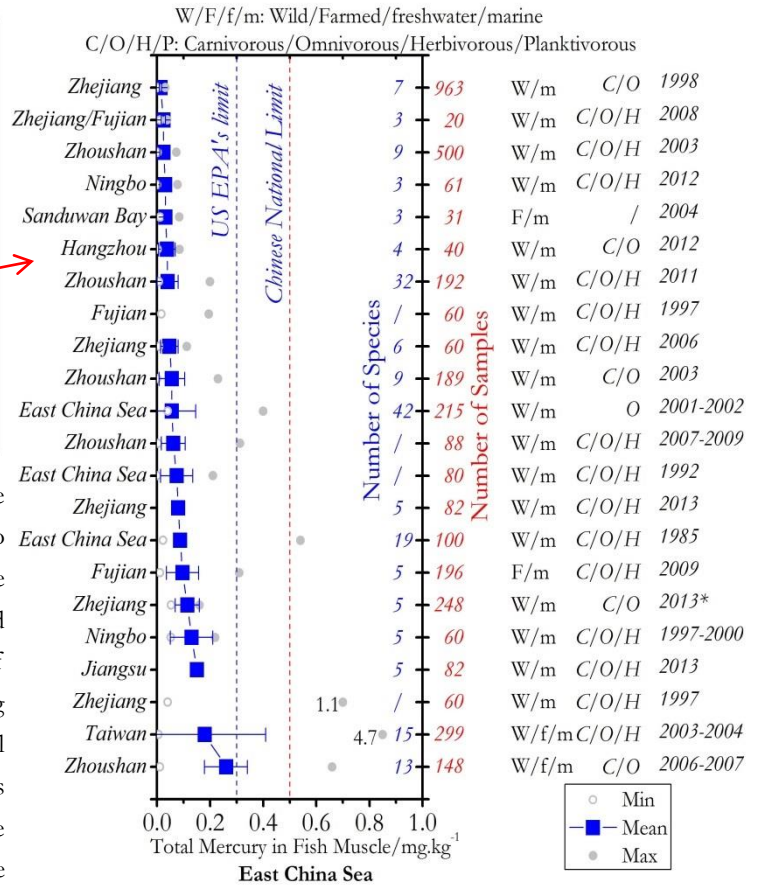

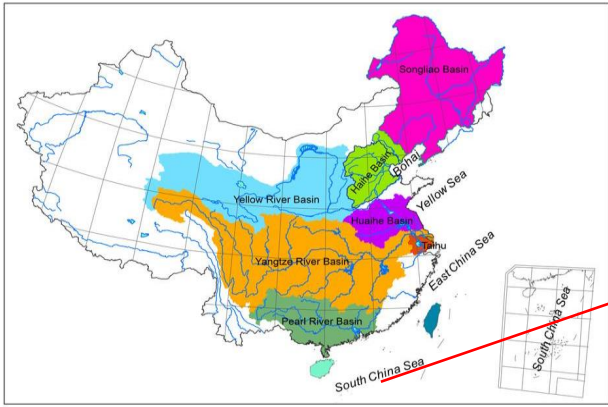

**Figure S4** Concentrations of total mercury in the muscle tissues of fish samples from the South China Sea from 1980 to 2014 according to the data in Table S3. The left map shows the location of the study area. For the right figure, the left side and the right side show the locations and number, respectively, of fish species/samples, fish types, feeding habits, and sampling years. The bottom side represents the concentrations of total mercury in muscle tissues of fish samples. The top side shows the abbreviations for the fish types and feeding habits, where W/F indicates the wild/farmed species and f/m indicates the freshwater/marine species. C/O/H/P indicates, respectively, carnivorous, omnivorous, herbivorous, and planktivorous species.

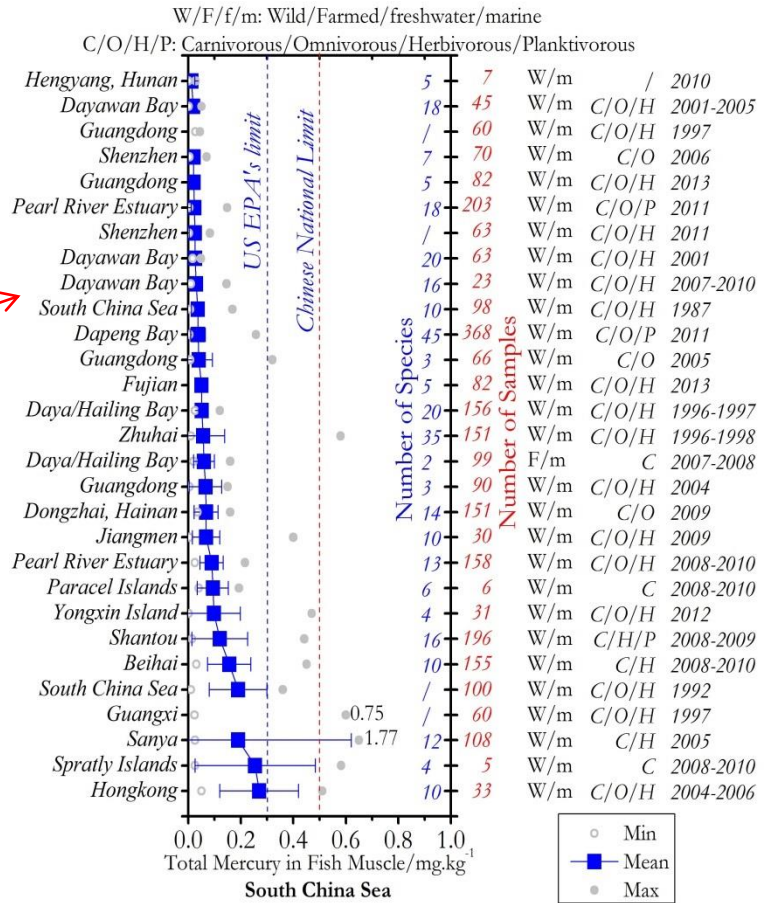

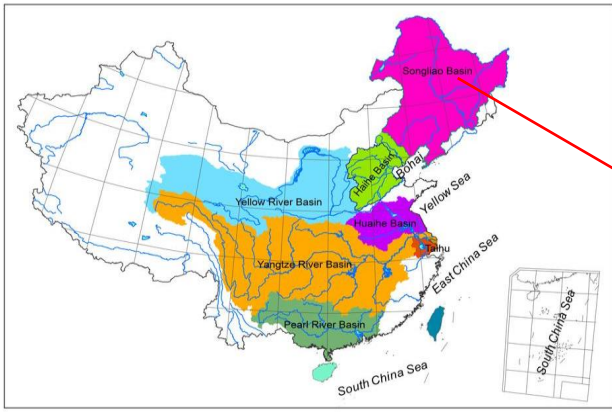

**Figure S5** Concentrations of total mercury in the muscle tissues of fish samples from the Songliao Basin from 1980 to 2014 according to the data in Table S3. The left map shows the location of the study area. For the right figure, the left side and the right side show the locations and number, respectively, of fish species/samples, fish types, feeding habits, and sampling years. The bottom side represents the concentrations of total mercury in muscle tissues of fish samples. The top side shows the abbreviations for the fish types and feeding habits, where W/F indicates the wild/farmed species and f/m indicates the freshwater/marine species. C/O/H/P indicates, respectively, carnivorous, omnivorous, herbivorous, and planktivorous species.

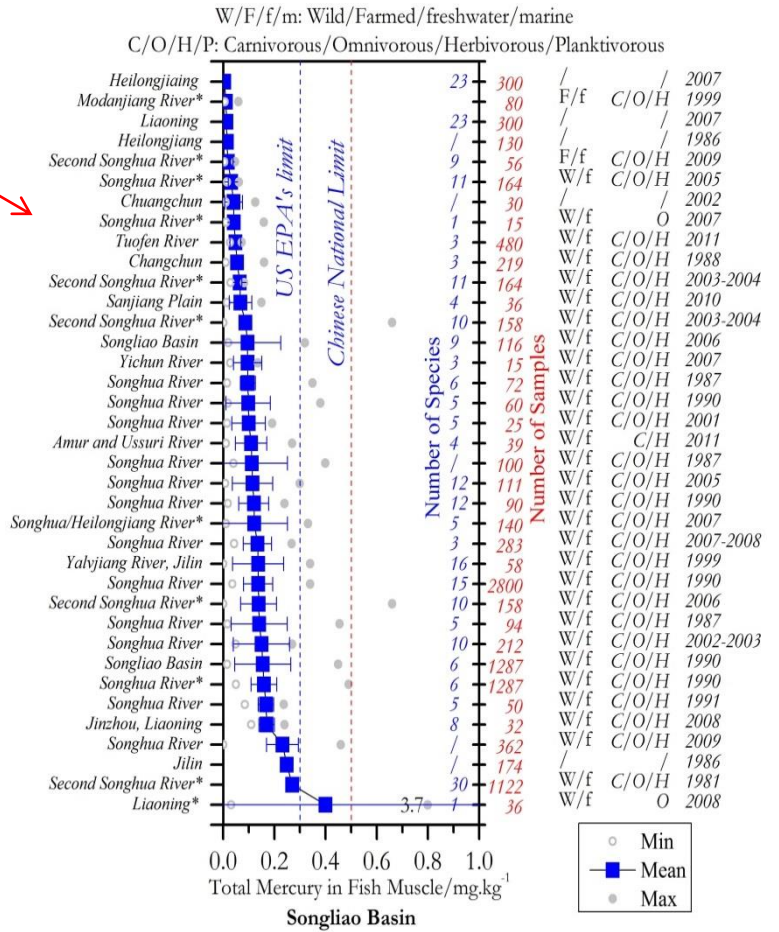

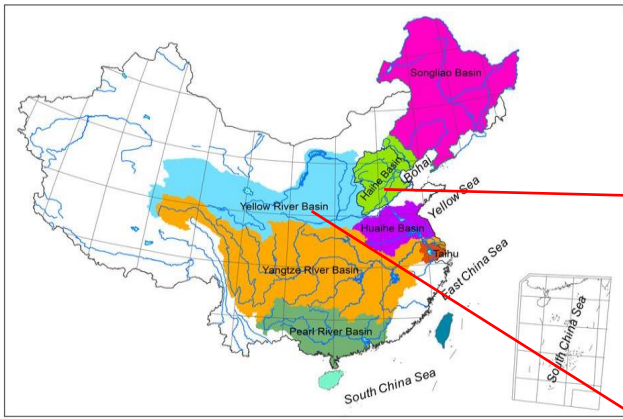

**Figure S6** Concentrations of total mercury in the muscle tissues of fish samples from the Haihe Basin and the Yellow River Basin from 1980 to 2014 according to the data in Table S3. The left map shows the location of the study area. For the right figure, the left side and the right side show the locations and number, respectively, of fish species/samples, fish types, feeding habits, and sampling years. The bottom side represents the concentrations of total mercury in muscle tissues of fish samples. The top side shows the abbreviations for the fish types and feeding habits, where W/F indicates the wild/farmed species and f/m indicates the freshwater/marine species. C/O/H/P indicates, respectively, carnivorous, omnivorous, herbivorous, and planktivorous species.

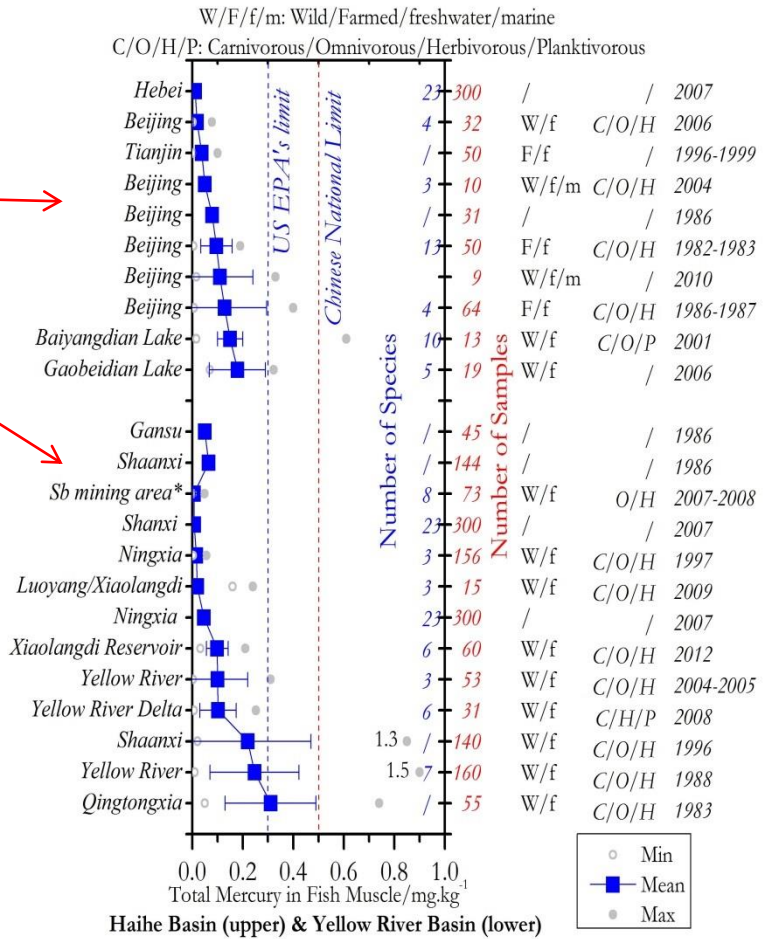



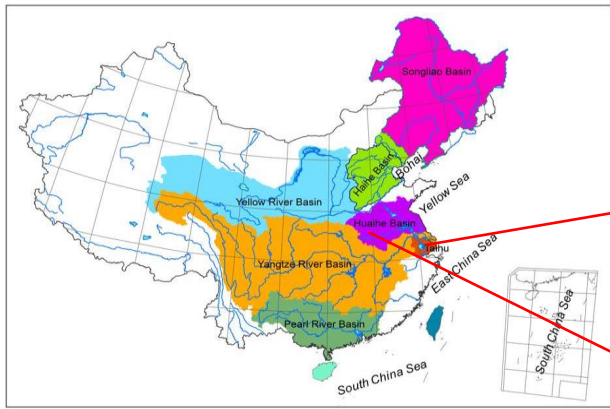

**Figure S7** Concentrations of total mercury in the muscle tissues of fish samples from the Huaihe Basin and the Taihu Basin from 1980 to 2014 according to the data in Table S3. The left map shows the location of the study area. For the right figure, the left side and the right side show the locations and number, respectively, of fish species/samples, fish types, feeding habits, and sampling years. The bottom side represents the concentrations of total mercury in muscle tissues of fish samples. The top side shows the abbreviations for the fish types and feeding habits, where W/F indicates the wild/farmed species and f/m indicates the freshwater/marine species. C/O/H/P indicates, respectively, carnivorous, omnivorous, herbivorous, and planktivorous species.

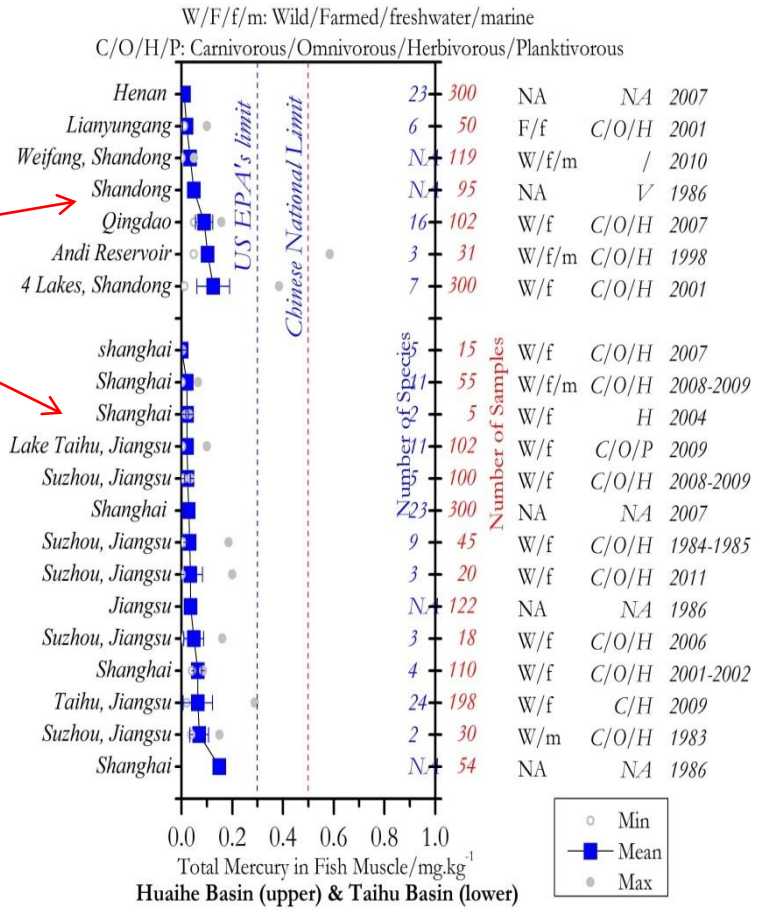

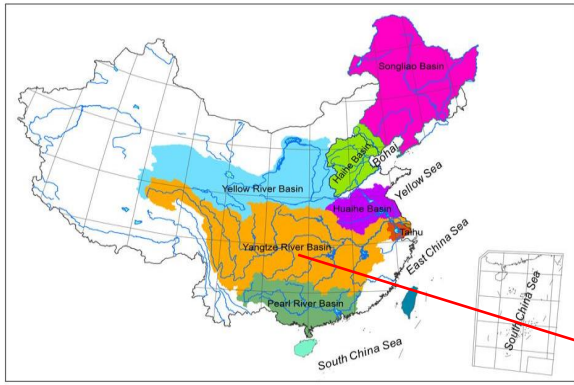

**Figure S8** Concentrations of total mercury in the muscle tissues of fish samples from the Yangtze River Basin from 1980 to 2014 according to the data in Table S3. The left map shows the location of the study area. For the right figure, the left side and the right side show the locations and number, respectively, of fish species/samples, fish types, feeding habits, and sampling years. The bottom side represents the concentrations of total mercury in muscle tissues of fish samples. The top side shows the abbreviations for the fish types and feeding habits, where W/F indicates the wild/farmed species and f/m indicates the freshwater/marine species. C/O/H/P indicates, respectively, carnivorous, omnivorous, herbivorous, and planktivorous species.

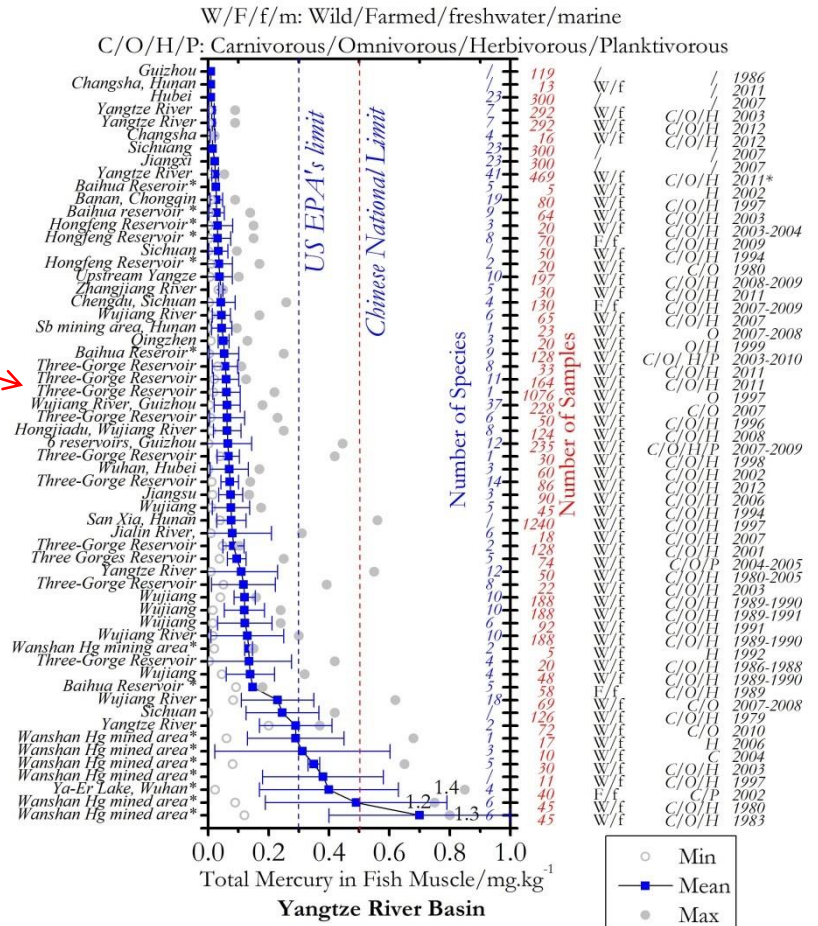

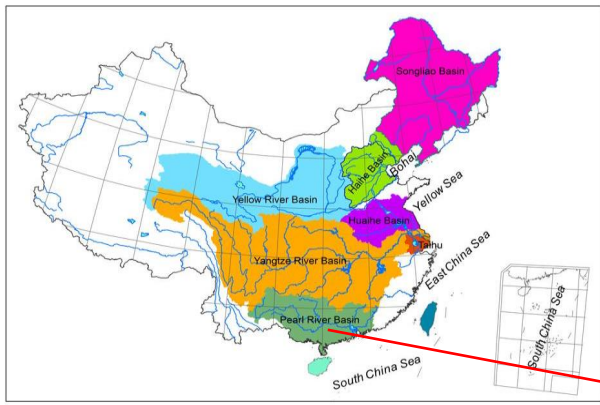

**Figure S9** Concentrations of total mercury in the muscle tissues of fish samples from the Pearl River Basin from 1980 to 2014 according to the data in Table S3. The left map shows the location of the study area. For the right figure, the left side and the right side show the locations and number, respectively, of fish species/samples, fish types, feeding habits, and sampling years. The bottom side represents the concentrations of total mercury in muscle tissues of fish samples. The top side shows the abbreviations for the fish types and feeding habits, where W/F indicates the wild/farmed species and f/m indicates the freshwater/marine species. C/O/H/P indicates, respectively, carnivorous, omnivorous, herbivorous, and planktivorous species.

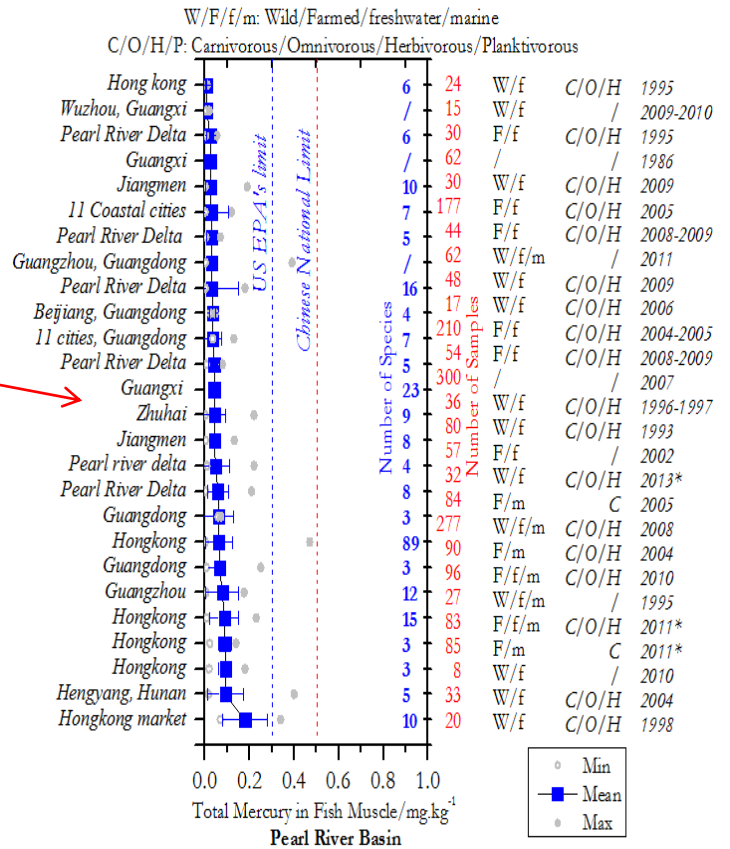

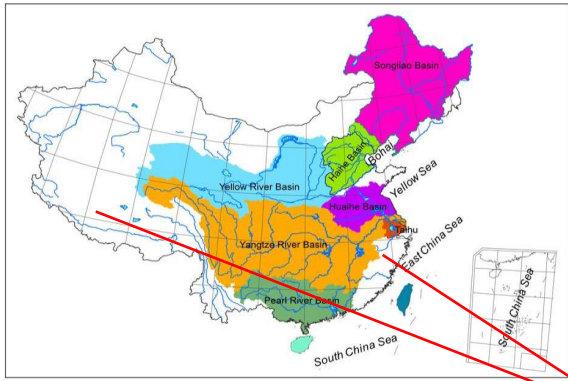

**Figure S10** Concentrations of total mercury in the muscle tissues of fish samples from the remaining mainland area (mainland area except for the seven basins) from 1980 to 2014 according to the data in Table S3. The left map shows the location of the study area. For the right figure, the left side and the right side show the locations and number, respectively, of fish species/samples, fish types, feeding habits, and sampling years. The bottom side represents the concentrations of total mercury in muscle tissues of fish samples. The top side shows the abbreviations for the fish types and feeding habits, where W/F indicates the wild/farmed species and f/m indicates the freshwater/marine species. C/O/H/P indicates, respectively, carnivorous, omnivorous, herbivorous, and planktivorous species.

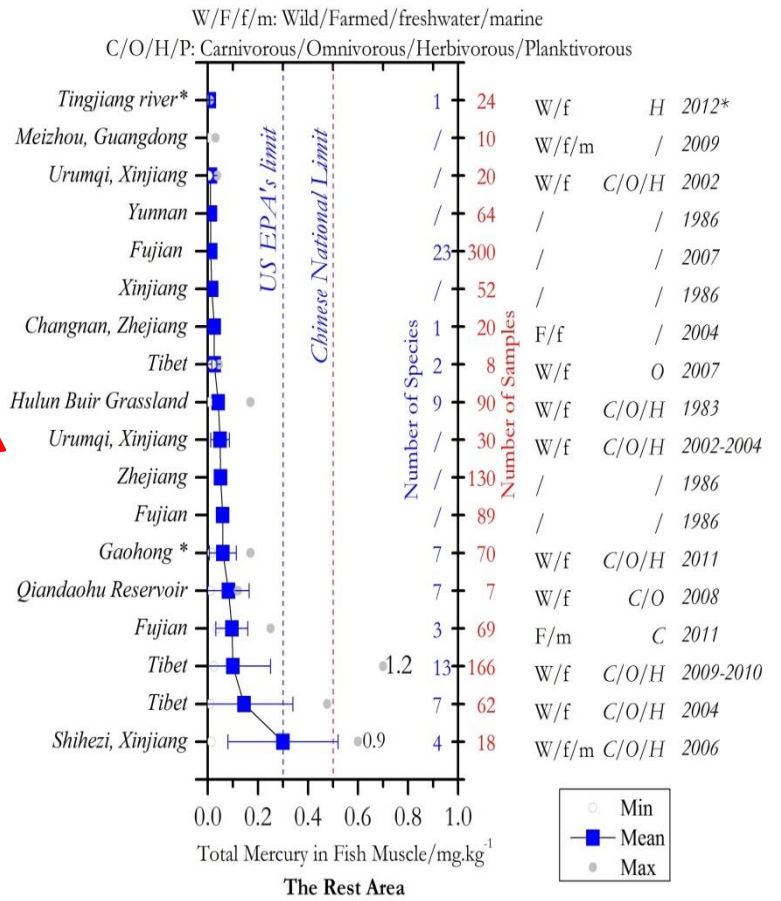

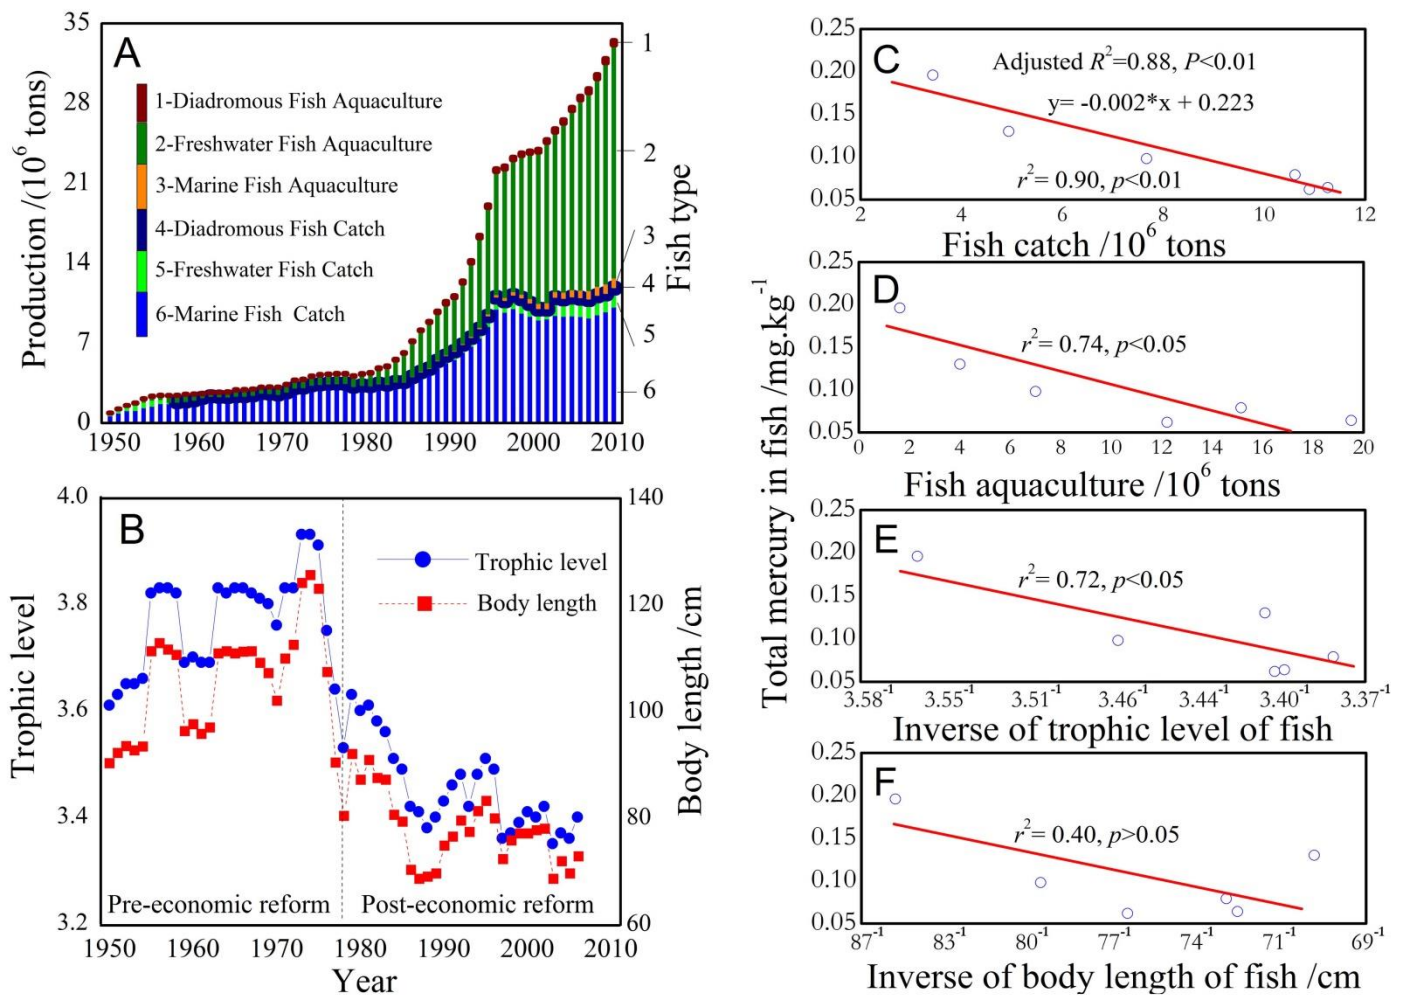

**Figure S11.** Historical trends of production, trophic diversity, and body size of fish and their relationships with total mercury in fish in China. (A) Aquaculture and catch data of marine fish, freshwater fish, and diadromous fish developed by the Food and agriculture organization of the United Nations (FAO) (<http://www.fao.org/fishery>). (B) The change in fish trophic level indices (the trophic level of primary producers set as 1) and mean maximum body length data developed by the Sea Around Us Project (<http://www.seaaroundus.org>). (C) Correlation between fish Hg level and fish catch. (D) Correlation between fish Hg level and fish aquaculture. (E) Correlation between fish Hg level and inverse of fish trophic level. (F) Correlation between fish Hg level and inverse of fish body length.

**Table S1** A summary of the temporal variation in total mercury levels in the muscle tissues of fish samples ( $\text{mg}\cdot\text{kg}^{-1}$ ; ww) in China during 1980-2014 based on data in Table S3.

| Years     | Weighted Mean | Min Value | Max Value | Sample Size |
|-----------|---------------|-----------|-----------|-------------|
| 2011-2014 | 0.054         | 0.001     | 0.60      | 4,198       |
| 2006-2010 | 0.064         | 0.001     | 3.70      | 10,710      |
| 2001-2005 | 0.079         | 0.001     | 1.36      | 4,818       |
| 1996-2000 | 0.062         | 0.001     | 4.69      | 4,408       |
| 1991-1995 | 0.098         | 0.001     | 0.36      | 795         |
| 1986-1990 | 0.130         | 0.004     | 1.45      | 8,332       |
| 1980-1985 | 0.196         | 0.006     | 1.30      | 2,153       |

**Table S2** Total Hg concentrations in the muscle tissues of fish samples ( $\text{mg kg}^{-1}$ ; ww) from 34 different administrative regions in China. W-Mean is the weighted mean; Detailed data and references are shown in Table S3.

| No.              | Regions      | Fish Hg/ $\text{mg kg}^{-1}$ | Fish Hg/ $\text{mg kg}^{-1}$ | Fish Consumption               |
|------------------|--------------|------------------------------|------------------------------|--------------------------------|
|                  |              | 2001-2014                    | 1980-2014                    | $\text{kg.yr}^{-1}$ per capita |
| <i>Provinces</i> |              |                              |                              |                                |
| 1                | Anhui*       | 0.023                        | 0.023                        | 5.2                            |
| 2                | Fujian       | 0.049                        | 0.032                        | 8.3                            |
| 3                | Gansu*       | 0.050                        | 0.005                        | 0.3                            |
| 4                | Guangdong    | 0.049                        | 0.056                        | 12.2                           |
| 5                | Guizhou      | 0.081                        | 0.116                        | 0.3                            |
| 6                | Hainan       | 0.117                        | 0.117                        | 13.5                           |
| 7                | Hebei        | 0.017                        | 0.047                        | 2.2                            |
| 8                | Heilongjiang | 0.108                        | 0.131                        | 3.8                            |
| 9                | Henan        | 0.025                        | 0.025                        | 1.4                            |
| 10               | Hubei        | 0.058                        | 0.086                        | 7.9                            |
| 11               | Hunan        | 0.019                        | 0.071                        | 5.6                            |
| 12               | Jiangsu      | 0.059                        | 0.043                        | 9.2                            |
| 13               | Jiangxi      | 0.024                        | 0.024                        | 4.7                            |
| 14               | Jilin        | 0.077                        | 0.181                        | 3.5                            |
| 15               | Liaoning     | 0.060                        | 0.058                        | 3.5                            |
| 16               | Qinghai      | 0.100                        | 0.100                        | 0.3                            |
| 17               | Shaaxi*      | 0.141                        | 0.141                        | 0.4                            |
| 18               | Shandong     | 0.097                        | 0.091                        | 3.4                            |
| 19               | Shanxi       | 0.008                        | 0.008                        | 0.7                            |
| 20               | Sichuan      | 0.064                        | 0.072                        | 2.5                            |
| 21               | Taiwan       | 0.140                        | 0.140                        | 18.3                           |
| 22               | Yunnan*      | 0.011                        | 0.011                        | 1.5                            |
| 23               | Zhejiang     | 0.071                        | 0.045                        | 9.7                            |

| No.                                          | Regions            | Fish Hg/ mg kg <sup>-1</sup> | Fish Hg/ mg kg <sup>-1</sup> | Fish Consumption               |
|----------------------------------------------|--------------------|------------------------------|------------------------------|--------------------------------|
|                                              |                    | 2001-2014                    | 1980-2014                    | kg.yr <sup>-1</sup> per capita |
| <b><i>Municipalities</i></b>                 |                    |                              |                              |                                |
| 24                                           | Beijing            | 0.079                        | 0.097                        | 4.0                            |
| 25                                           | Conggqin *         | 0.027                        | 0.027                        | 3.3                            |
| 26                                           | Shanghai           | 0.034                        | 0.046                        | 11.3                           |
| 27                                           | Tianjin            | 0.048                        | 0.043                        | 7.8                            |
| <b><i>Autonomous regions</i></b>             |                    |                              |                              |                                |
| 28                                           | Guangxi            | 0.078                        | 0.072                        | 3.3                            |
| 29                                           | Inner Mongolia *   | 0.042                        | 0.042                        | 1.8                            |
| 30                                           | Tibet              | 0.109                        | 0.109                        | 0                              |
| 31                                           | Ningxia            | 0.046                        | 0.108                        | 0.3                            |
| 32                                           | Xinjiang           | 0.104                        | 0.110                        | 0.4                            |
| <b><i>Special administrative regions</i></b> |                    |                              |                              |                                |
| 33                                           | Hong Kong          | 0.069                        | 0.064                        | 46                             |
| 34                                           | Macao <sup>a</sup> | 0.052                        | 0.052                        | 18.3                           |
| <b><i>Coastal Seas</i></b>                   |                    |                              |                              |                                |
|                                              | Bohai Sea          | 0.060                        | 0.053                        | /                              |
|                                              | Yellow Sea         | 0.082                        | 0.115                        | /                              |
|                                              | East China Sea     | 0.063                        | 0.068                        | /                              |
|                                              | South China Sea    | 0.072                        | 0.072                        | /                              |

\* Data from this region were reported from 1980 to 2000 without available data since 2001. <sup>a</sup> The Pearl River Estuary fish data are applied for Macao. NA indicates data were not available.



**Table S3** Concentrations of the total mercury in the muscle tissue of fish samples (mg.kg<sup>-1</sup>; ww) collected from the coastal waters (Bohai and Yellow Sea, East China Sea, and South China Sea), the seven basins of China (Yangtze River Basin, Yellow River Basin, Songliao Basin, Haihe Basin, Huaihe Basin, and Pearl River Basin), and the remaining mainland area (mainland area except for the seven basins) as well as fish types (W/F/f/m: Wild/Farmed/freshwater/marine), feeding habits (C/O/H/P: Carnivorous/Omnivorous/Herbivorous/Planktivorous), number of fish species/samples, sampling years, and analysis methods (AFS: Atomic Fluorescence Spectrometry; CVAFS: Cold Vapor Atomic Fluorescence Spectrometry; HGAFS: Hydride Generation Atomic Fluorescence Spectrometer; AAS: Atomic Absorption Spectrometry/Spectrophotometry; CVAAS: Cold Vapor Atomic Absorption Spectrometry/Spectrophotometry; DC: Dithizone Colorimetry; ICP-MS: Inductively Coupled Plasma Mass Spectrometry; MC: Meteorological Chromatography). NA indicates data were not available. The “\*” in the “Location” row indicates heavily contaminated sites; in the “Total mercury” row, “\*” indicates that values were transformed from methylmercury with the assumption that 80% of total mercury was methylmercury; and in the “Sampling year” row, \* indicates the “publication years” for which sampling years were unavailable. The whole dataset covers >600 fish species, with >230 species for freshwater fish and >370 species for marine fish (only within the English literature; detailed fish species names are listed in Table S4).

| Locations              | Total mercury /mg.kg <sup>-1</sup> |       |       |       | Fish types | Feeding habits | Species No. | Samples No. | Sampling year | Analysis methods | Data sources |
|------------------------|------------------------------------|-------|-------|-------|------------|----------------|-------------|-------------|---------------|------------------|--------------|
|                        | Mean                               | SD    | Min   | Max   |            |                |             |             |               |                  |              |
| <b>Bohai Sea</b>       |                                    |       |       |       |            |                |             |             |               |                  |              |
| Laizhou Bay (Bohai)    | 0.051                              | 0.064 | 0.002 | 0.274 | W/m        | C/O/H/P        | 5           | 67          | 2010          | AFS              | [1]          |
| Dalian/Tianjin (Bohai) | 0.024                              | 0.006 | 0.020 | 0.032 | W/m        | C/O/H          | 3           | 25          | 2008          | AFS              | [2]          |
| Tianjin (Bohai)        | 0.077                              | 0.042 | 0.022 | 0.152 | W/m        | C/O/H          | 5           | 20          | 2003          | AAS              | [3]          |
| Yingkou, Liaoning      | 0.015                              | 0.006 | 0.008 | 0.022 | W/m        | C/O/H          | 6           | 18          | 2002          | AFS              | [4]          |
| Jinzhou, Liaoning      | 0.330                              | 0.180 | 0.160 | 0.580 | W/m        | C/O/H          | 4           | 16          | 2009          | CVAAS            | [5]          |
| Dalian, Liaoning       | 0.030                              | 0.025 | 0.020 | 0.110 | W/m        | NA             | 17          | 51          | 2011          | AFS              | [6]          |
| Huludao city, Liaoning | 0.020                              | 0.001 | 0.018 | 0.020 | W/m        | C              | NA          | 15          | 2006-2007     | CVAFS            | [7]          |
| 6 areas, Jilin         | 0.133                              | 0.100 | 0.001 | 0.340 | W/m        | C/O/H          | 20          | 30          | 2010          | AFS              | [8]          |
| Weihai, Shandong       | 0.022                              | 0.006 | 0.002 | 0.059 | W/m        | C/O/H          | 5           | 15          | 2005          | AFS              | [9]          |
| Tai'an, Shandong       | 0.138                              | 0.089 | 0.018 | 0.240 | W/m        | C/O/H          | 6           | 20          | 2005          | CVAAS            | [10]         |
| Shandong coastal       | NA                                 | NA    | 0.006 | 0.082 | W/m        | C/O/H          | NA          | 60          | 1997          | CVAFS            | [11]         |
| Bohai Sea              | 0.057                              | 0.020 | 0.020 | 0.090 | W/m        | C/O/H          | NA          | 80          | 1992          | CVAAS            | [12]         |
| Bohaiwan Bay           | 0.041                              | 0.047 | 0.002 | 0.880 | W/m        | C/O/H          | 22          | 368         | 1980-1981     | CVAAS            | [13]         |
| Bohaiwan Bay           | 0.063                              | 0.081 | 0.004 | 0.290 | W/m        | C/O/H          | 15          | 183         | 1980-1981     | CVAAS            | [13]         |
| Liaoning (Bohai)       | 0.020                              | NA    | NA    | NA    | W/m        | C/O/H          | 5           | 82          | 2013          | CVAFS            | [14]         |
| <b>Yellow Sea</b>      |                                    |       |       |       |            |                |             |             |               |                  |              |
| Yellow Sea             | 0.089                              | 0.067 | 0.018 | 0.370 | W/m        | C/O            | 9           | 164         | 2012          | CVAFS            | [15]         |

| Locations                                 | Total mercury /mg.kg <sup>-1</sup> |       |       |       | Fish types | Feeding habits | Species No. | Samples No. | Sampling year | Analysis methods | Data sources |
|-------------------------------------------|------------------------------------|-------|-------|-------|------------|----------------|-------------|-------------|---------------|------------------|--------------|
|                                           | Mean                               | SD    | Min   | Max   |            |                |             |             |               |                  |              |
| Yellow Sea                                | 0.028                              | 0.016 | 0.008 | 0.050 | W/m        | C/O/H          | 3           | 20          | 2008          | AFS              | [2]          |
| Yellow Sea                                | 0.190                              | 0.100 | 0.050 | 0.320 | W/m        | C/O/H          | NA          | 80          | 1992          | CVAAS            | [12]         |
| <b><i>East China Sea</i></b>              |                                    |       |       |       |            |                |             |             |               |                  |              |
| Zhejiang (East China Sea)                 | 0.114                              | 0.045 | 0.053 | 0.160 | W/m        | C/O            | 5           | 248         | 2013*         | CVAFS            | [16]         |
| East China Sea                            | 0.056                              | 0.090 | 0.040 | 0.400 | W/m        | O              | 42          | 215         | 2001-2002     | CVAFS            | [17]         |
| East China Sea                            | 0.074                              | 0.060 | 0.001 | 0.210 | W/m        | C/O/H          | NA          | 80          | 1992          | CVAAS            | [12]         |
| East China Sea                            | 0.087                              | NA    | 0.023 | 0.540 | W/m        | C/O/H          | 19          | 100         | 1985          | NA               | [18]         |
| Zhejiang (East China Sea)                 | 0.080                              | NA    | NA    | NA    | W/m        | C/O/H          | 5           | 82          | 2013          | CVAFS            | [14]         |
| Zhejiang (East China Sea)                 | NA                                 | NA    | 0.040 | 1.100 | W/m        | C/O/H          | NA          | 60          | 1997          | CVAFS            | [11]         |
| Hangzhou, Zhejiang                        | 0.037                              | 0.031 | 0.003 | 0.085 | W/m        | C/O            | 4           | 40          | 2012          | CVAFS            | [19]         |
| Zhejiang                                  | 0.047                              | 0.033 | 0.008 | 0.112 | W/m        | C/O/H          | 6           | 60          | 2006          | AFS              | [20]         |
| Ningbo, Zhejiang                          | 0.130                              | 0.080 | 0.052 | 0.218 | W/m        | C/O/H          | 5           | 60          | 1997-2000     | CVAFS            | [21]         |
| Ningbo, Zhejiang                          | 0.031                              | 0.021 | 0.001 | 0.077 | W/m        | C/O/H          | 3           | 61          | 2012          | CVAFS            | [22]         |
| Zhoushan, Zhejiang                        | 0.056                              | 0.048 | 0.001 | 0.230 | W/m        | C/O            | 9           | 189         | 2003          | CVAAS            | [23]         |
| Zhoushan, Zhejiang                        | 0.040*                             | 0.039 | 0.007 | 0.200 | W/m        | C/O/H          | 32          | 192         | 2011          | MC               | [24]         |
| Zhoushan, Zhejiang                        | 0.061*                             | 0.045 | 0.004 | 0.313 | W/m        | C/O/H          | NA          | 88          | 2007-2009     | CVAAS            | [25]         |
| Zhoushan, Zhejiang                        | 0.025                              | 0.015 | 0.003 | 0.072 | W/m        | C/O/H          | 9           | 500         | 2003          | CVAAS            | [26]         |
| 11 stations along Zhejiang coastline line | 0.013                              | 0.004 | 0.002 | 0.032 | W/m        | C/O            | 7           | 963         | 1998          | CVAAS            | [27]         |
| 5 Coastal cities (Zhejiang/Fujian)        | 0.024                              | 0.008 | 0.012 | 0.038 | W/m        | C/O/H          | 3           | 20          | 2008          | AFS              | [2]          |
| Fujian                                    | NA                                 | NA    | 0.016 | 0.195 | W/m        | C/O/H          | NA          | 60          | 1997          | CVAFS            | [11]         |
| Taiwan                                    | 0.070                              | 0.050 | 0.010 | 0.198 | W/m        | C              | 11          | 33          | 2004          | AAS              | [28]         |
| Taichung, Taiwan                          | 0.103                              | 0.110 | 0.003 | 0.600 | W/m        | C/O            | 12          | 240         | 2011*         | AAS              | [29]         |
| Suzhou, Jiangsu                           | 0.070                              | 0.037 | 0.038 | 0.150 | W/m        | C/O/H          | 2           | 30          | 1983          | CVAAS            | [30]         |
| Jiangsu                                   | 0.150                              | NA    | NA    | NA    | W/m        | C/O/H          | 5           | 82          | 2013          | CVAFS            | [14]         |
| <b><i>South China Sea</i></b>             |                                    |       |       |       |            |                |             |             |               |                  |              |
| Yongxin Island, Hainan                    | 0.098                              | 0.100 | 0.002 | 0.470 | W/m        | C/O/H          | 4           | 31          | 2012          | AAS              | [31]         |

| Locations                         | Total mercury /mg.kg <sup>-1</sup> |       |       |       | Fish types | Feeding habits | Species No. | Samples No. | Sampling year | Analysis methods | Data sources |
|-----------------------------------|------------------------------------|-------|-------|-------|------------|----------------|-------------|-------------|---------------|------------------|--------------|
|                                   | Mean                               | SD    | Min   | Max   |            |                |             |             |               |                  |              |
| Shantou, Guangdong                | 0.120                              | 0.106 | 0.014 | 0.442 | W/m        | C/H/P          | 16          | 196         | 2008-2009     | CVAFS            | [32]         |
| Beihai, Guangxi                   | 0.156                              | 0.083 | 0.031 | 0.451 | W/m        | C/H            | 10          | 155         | 2008-2010     | CVAFS            | [32]         |
| Sanya, Hainan                     | 0.190                              | 0.431 | 0.026 | 1.765 | W/m        | C/H            | 12          | 108         | 2005          | CVAFS            | [32]         |
| Paracel Islands                   | 0.094                              | 0.059 | 0.040 | 0.193 | W/m        | C              | 6           | 6           | 2008-2010     | CVAFS            | [32]         |
| Spratly Islands                   | 0.255                              | 0.229 | 0.026 | 0.582 | W/m        | C              | 4           | 5           | 2008-2010     | CVAFS            | [32]         |
| South China Sea                   | 0.190                              | 0.110 | 0.010 | 0.360 | W/m        | C/O/H          | NA          | 100         | 1992          | CVAFS            | [11]         |
| South China Sea                   | 0.036                              | 0.024 | 0.007 | 0.168 | W/m        | C/O/H          | 10          | 98          | 1987          | CVAAS            | [33]         |
| Pearl River Estuary               | 0.023                              | 0.012 | 0.004 | 0.148 | W/m        | C/O/P          | 18          | 203         | 2011          | CVAFS            | [34]         |
| Pearl River Estuary               | 0.089                              | 0.044 | 0.025 | 0.216 | W/m        | C/O/H          | 13          | 158         | 2008-2010     | CVAFS            | [32]         |
| Hong Kong                         | 0.270                              | 0.150 | 0.050 | 0.510 | W/m        | C/O/H          | 10          | 33          | 2004          | ICP-MS           | [35]         |
| Fujian                            | 0.050                              | NA    | NA    | NA    | W/m        | C/O/H          | 5           | 82          | 2013          | CVAFS            | [14]         |
| Guangxi                           | NA                                 | NA    | 0.024 | 0.750 | W/m        | C/O/H          | NA          | 60          | 1997          | CVAFS            | [11]         |
| Dayawan Bay, Guangdong            | 0.030                              | NA    | 0.010 | 0.146 | W/m        | C/O/H          | 16          | 23          | 2007-2010     | AFS              | [36]         |
| Dayawan Bay, Guangdong            | 0.019                              | NA    | 0.002 | 0.050 | W/m        | C/O/H          | 18          | 45          | 2001-2005     | CVAFS            | [37]         |
| Dayawan Bay, Guangdong            | 0.026                              | NA    | 0.017 | 0.048 | W/m        | C/O/H          | 20          | 63          | 2001          | CVAAS            | [38]         |
| Daya/Hailing Bay, Guangdong       | 0.051                              | 0.011 | 0.026 | 0.120 | W/m        | C/O/H          | 20          | 156         | 1996-1997     | CVAFS            | [39]         |
| Guangdong                         | 0.020                              | NA    | NA    | NA    | W/m        | C/O/H          | 5           | 82          | 2013          | CVAFS            | [14]         |
| Guangdong                         | NA                                 | NA    | 0.027 | 0.045 | W/m        | C/O/H          | NA          | 60          | 1997          | CVAFS            | [11]         |
| Jiangmen, Guangdong               | 0.068                              | 0.052 | 0.004 | 0.400 | W/m        | C/O/H          | 10          | 30          | 2009          | AFS              | [40]         |
| Shenzhen, Guangdong               | 0.025                              | 0.021 | 0.003 | 0.082 | W/m        | C/O/H          | NA          | 63          | 2011          | ICP-MS           | [41]         |
| Zhuhai, Guangdong                 | 0.057                              | 0.082 | 0.010 | 0.580 | W/m        | C/O/H          | 35          | 151         | 1996-1998     | CVAAS            | [42]         |
| Hengyang, Hunan                   | 0.012                              | 0.013 | 0.001 | 0.028 | W/m        | NA             | 5           | 7           | 2010          | CVAFS            | [43]         |
| 11 Guangdong coastal cities       | 0.066                              | 0.062 | 0.004 | 0.150 | W/m        | C/O/H          | 3           | 90          | 2004          | CVAFS            | [44]         |
| Shenzhen Coastal Areas, Guangdong | 0.020                              | 0.020 | 0.005 | 0.070 | W/m        | C/O            | 7           | 70          | 2006          | CVAAS            | [45]         |
| Dapeng Bay, Hong Kong             | 0.037                              | 0.028 | 0.005 | 0.258 | W/m        | C/O/P          | 45          | 368         | 2011          | CVAFS            | [34]         |
| 11 Guangdong Coastal cities       | 0.040                              | 0.052 | 0.008 | 0.320 | W/m        | C/O            | 3           | 66          | 2005          | CVAFS            | [46]         |
| Dongzhai, Hainan                  | 0.068                              | 0.046 | 0.035 | 0.160 | W/m        | C/O            | 14          | 151         | 2009          | CVAFS            | [47]         |

| Locations                         | Total mercury /mg.kg <sup>-1</sup> |       |       |       | Fish types | Feeding habits | Species No. | Samples No. | Sampling year | Analysis methods | Data sources |
|-----------------------------------|------------------------------------|-------|-------|-------|------------|----------------|-------------|-------------|---------------|------------------|--------------|
|                                   | Mean                               | SD    | Min   | Max   |            |                |             |             |               |                  |              |
| <b><i>Yangtze River Basin</i></b> |                                    |       |       |       |            |                |             |             |               |                  |              |
| Hongfeng Reservoir*, Guizhou      | 0.032                              | 0.050 | 0.003 | 0.150 | W/f        | C/O/H          | 3           | 20          | 2003-2004     | CVAFS            | [48]         |
| Hongfeng Reservoir*, Guizhou      | NA                                 | NA    | 0.003 | 0.006 | W/f        | O              | 4           | 25          | 2003          | CVAFS            | [49]         |
| Hongfeng Reservoir *, Guizhou     | 0.036                              | 0.044 | 0.010 | 0.170 | W/f        | C/O            | 2           | 20          | 1980          | NA               | [50]         |
| Baihua Reservoir*, Guizhou        | 0.053                              | 0.049 | 0.004 | 0.250 | W/f        | C/O/ H/P       | 9           | 128         | 2003          | AAS              | [51]         |
| Baihua reservoir *, Guizhou       | 0.028                              | 0.025 | 0.004 | 0.140 | W/f        | C/O/H          | 9           | 64          | 2003          | CVAFS            | [52]         |
| Baihua Reservoir*, Guizhou        | 0.026                              | NA    | NA    | NA    | W/f        | H              | 5           | 5           | 2002          | CVAFS            | [53]         |
| Wanshan Hg mining area*, Guizhou  | 0.290                              | 0.160 | 0.061 | 0.680 | W/f        | H              | 1           | 17          | 2006          | CVAFS            | [54]         |
| Wanshan Hg mined area*, Guizhou   | 0.312                              | 0.290 | NA    | NA    | W/f        | C              | 3           | 10          | 2004          | AFS              | [55]         |
| Wanshan Hg mined area*, Guizhou   | 0.350                              | 0.020 | 0.081 | 0.650 | W/f        | C/O/H          | 5           | 30          | 2003          | CVAAS            | [56]         |
| Wanshan Hg mined area*, Guizhou   | 0.380                              | 0.200 | NA    | NA    | W/f        | C/O/H          | NA          | 11          | 1997          | CVAAS            | [57]         |
| Wanshan Hg mining area*, Guizhou  | 0.134                              | 0.013 | 0.020 | 0.150 | W/f        | H              | 2           | 5           | 1992          | AAS              | [58]         |
| Wanshan Hg mined area*, Guizhou   | 0.700                              | 0.300 | 0.120 | 1.300 | W/f        | C/O/H          | 6           | 45          | 1983          | CVAAS            | [59]         |
| Wanshan Hg mined area*, Guizhou   | 0.490                              | 0.300 | 0.090 | 1.160 | W/f        | C/O/H          | 6           | 45          | 1980          | CVAAS            | [60]         |
| Hongjiadu, Wujiang River, Guizhou | 0.063                              | 0.046 | 0.011 | 0.250 | W/f        | C/O/H          | 8           | 124         | 2008          | CVAFS            | [61]         |
| Wujiang River, Guizhou            | 0.230                              | 0.120 | 0.083 | 0.620 | W/f        | C/O            | 18          | 69          | 2007-2008     | AAS              | [62]         |
| Wujiang River, Guizhou            | 0.044                              | 0.030 | 0.010 | 0.170 | W/f        | C/O/H          | 6           | 65          | 2007          | CVAFS            | [63]         |
| Wujiang River, Guizhou            | 0.063                              | 0.043 | 0.005 | 0.180 | W/f        | C/O            | 37          | 228         | 2007          | AAS              | [64]         |
| Wujiang lower reaches, Guizhou    | 0.076                              | 0.062 | 0.011 | 0.176 | W/f        | C/O/H          | 5           | 45          | 1994          | CVAFS            | [65]         |
| Wujiang upper reaches, Guizhou    | 0.122                              | 0.090 | 0.016 | 0.240 | W/f        | C/O/H          | 6           | 92          | 1991          | CVAAS            | [66]         |
| Wujiang upper reaches, Guizhou    | 0.120                              | 0.067 | 0.016 | 0.240 | W/f        | C/O/H          | 10          | 188         | 1989-1990     | NA               | [67]         |
| Wujiang upper reaches, Guizhou    | 0.121*                             | 0.035 | 0.041 | 0.159 | W/f        | C/O/H          | 10          | 188         | 1989-1990     | MC               | [68]         |
| Wujiang upper reaches, Guizhou    | 0.140                              | 0.080 | 0.045 | 0.320 | W/f        | C/O/H          | 4           | 48          | 1989-1990     | CVAAS            | [69]         |
| Wujiang River, Guizhou            | 0.130                              | 0.120 | 0.016 | 0.300 | W/f        | C/O/H          | 10          | 188         | 1989-1990     | CVAAS            | [70]         |
| 6 reservoirs, Guizhou             | 0.066                              | 0.078 | 0.002 | 0.445 | W/f        | C/O/H/P        | 12          | 235         | 2007-2009     | CVAFS            | [71]         |
| Guizhou                           | 0.009*                             | NA    | NA    | NA    | NA         | NA             | NA          | 119         | 1986          | MC               | [72]         |
| Hongfeng Reservoir *, Guizhou     | 0.032                              | 0.043 | 0.003 | 0.150 | F/f        | C/O/H          | 8           | 70          | 2009          | CVAFS            | [73]         |

| Locations                                   | Total mercury /mg.kg <sup>-1</sup> |       |       |       | Fish types | Feeding habits | Species No. | Samples No. | Sampling year | Analysis methods | Data sources |
|---------------------------------------------|------------------------------------|-------|-------|-------|------------|----------------|-------------|-------------|---------------|------------------|--------------|
|                                             | Mean                               | SD    | Min   | Max   |            |                |             |             |               |                  |              |
| Baihua Reservoir *, Guizhou                 | 0.148                              | NA    | 0.092 | 0.180 | F/f        | C/O/H          | 5           | 58          | 1989          | CVAFS            | [74]         |
| Qingzhen, Guizhou                           | 0.051                              | 0.018 | 0.010 | 0.130 | W/f        | O/H            | 3           | 20          | 1999          | CVAAS            | [75]         |
| Three-Gorge Reservoir, Sichuan              | 0.072                              | 0.029 | 0.012 | 0.140 | W/f        | C/O/H          | 14          | 86          | 2012          | CVAAS            | [76]         |
| Three-Gorge Reservoir, Sichuan              | 0.060                              | 0.042 | 0.021 | 0.125 | W/f        | C/O/H          | 11          | 164         | 2011          | CVAAS            | [77]         |
| Three-Gorge Reservoir, Sichuan              | 0.056                              | 0.042 | 0.031 | 0.110 | W/f        | C/O/H          | 8           | 33          | 2011          | CVAAS            | [78]         |
| Three Gorges Reservoir, Sichuan             | 0.095                              | 0.031 | 0.038 | 0.250 | W/f        | C/O/P          | 5           | 74          | 2004-2005     | AFS              | [79]         |
| Three-Gorge Reservoir, Sichuan              | 0.117                              | 0.106 | 0.051 | 0.393 | W/f        | C/O/H          | 8           | 22          | 2003          | CVAAS            | [80]         |
| Three-Gorge Reservoir, Sichuan              | 0.084                              | 0.035 | 0.048 | 0.104 | W/f        | C/O/H          | 2           | 128         | 2001          | CVAAS            | [81]         |
| Three-Gorge Reservoir, Sichuan              | 0.067                              | 0.037 | 0.040 | 0.420 | W/f        | C/O/H          | 1           | 30          | 1998          | NA               | [82]         |
| Three-Gorge Reservoir, Sichuan              | 0.061                              | 0.045 | 0.018 | 0.220 | W/f        | O              | 1           | 1076        | 1997          | CVAFS            | [83]         |
| Three-Gorge Reservoir, Sichuan              | 0.063*                             | 0.058 | 0.008 | 0.230 | W/f        | C/O/H          | 6           | 50          | 1996          | CVAAS            | [84]         |
| Three-Gorge Reservoir, Sichuan              | 0.136                              | 0.140 | 0.004 | 0.420 | W/f        | C/O/H          | 4           | 20          | 1986-1988     | CVAAS            | [85]         |
| Sichuan                                     | 0.034                              | 0.032 | 0.001 | 0.095 | W/f        | C/O/H          | NA          | 50          | 1994          | NA               | [86]         |
| Upper Reaches of the Yangtze River, Sichuan | 0.290                              | 0.120 | 0.200 | 0.370 | W/f        | C/O            | 2           | 72          | 2010          | AFS              | [87]         |
| Upstream Yangze, Sichuan                    | 0.038                              | 0.042 | 0.006 | 0.102 | W/f        | C/O/H          | 10          | 197         | 2008-2009     | CVAFS            | [88]         |
| Upstream Yangtze Jiang, Sichuan             | 0.110                              | 0.120 | 0.010 | 0.550 | W/f        | C/O/H          | 12          | 50          | 1980-2005     | AFS              | [89]         |
| Jialin River, Sichuan                       | 0.080                              | 0.130 | 0.010 | 0.310 | W/f        | C/O/H          | 6           | 18          | 2007          | AFS              | [89]         |
| Sichuang                                    | 0.015                              | NA    | NA    | NA    | NA         | NA             | 23          | 300         | 2007          | AAS              | [90]         |
| Chengdu, Sichuan                            | 0.042                              | 0.048 | 0.004 | 0.258 | F/f        | C/O/H          | 4           | 130         | 2007-2009     | CVAFS            | [91]         |
| Banan, Three Geoges Reservoir, Chongqin     | 0.027                              | 0.021 | 0.010 | 0.090 | W/f        | C/O/H          | 19          | 80          | 1997          | AAS              | [92]         |
| San Xia, Hunan                              | 0.077                              | 0.048 | 0.040 | 0.560 | W/f        | C/O/H          | NA          | 1240        | 1997          | CVAAS            | [93]         |
| Changsha, Hunan                             | 0.015                              | 0.008 | 0.008 | 0.022 | W/f        | C/O/H          | 4           | 16          | 2012          | CVAFS            | [94]         |
| Changsha, Hunan                             | 0.009                              | NA    | NA    | NA    | W/f        | NA             | NA          | 13          | 2011          | CVAAS            | [95]         |
| Sb mining area*, Hunan                      | 0.045                              | 0.034 | 0.000 | 0.095 | W/f        | O              | 1           | 23          | 2007-2008     | HG-AFS           | [96]         |
| Wuhan, Hubei                                | 0.070                              | 0.063 | 0.002 | 0.170 | W/f        | C/O/H          | 3           | 60          | 2002          | CVAAS            | [97]         |

| Locations                                                                 | Total mercury /mg.kg <sup>-1</sup> |       |       |       | Fish types | Feeding habits | Species No. | Samples No. | Sampling year | Analysis methods | Data sources |
|---------------------------------------------------------------------------|------------------------------------|-------|-------|-------|------------|----------------|-------------|-------------|---------------|------------------|--------------|
|                                                                           | Mean                               | SD    | Min   | Max   |            |                |             |             |               |                  |              |
| Wuhan (Reservoir*), Hubei                                                 | 0.650                              | 0.120 | 0.023 | 3.190 | W/f        | C/O/H          | 2           | 20          | 1998          | CVAAS            | [98]         |
| Hubei                                                                     | 0.010                              | NA    | NA    | NA    | NA         | NA             | 23          | 300         | 2007          | AAS              | [90]         |
| Ya-Er Lake, Wuhan*, Hubei                                                 | 0.400                              | 0.230 | 0.023 | 1.360 | F/f        | C/P            | 4           | 40          | 2002          | AFS              | [99]         |
| Jiangsu Block of Yangtze                                                  | 0.075                              | 0.040 | 0.015 | 0.136 | W/f        | C/O/H          | 3           | 90          | 2006          | CVAAS            | [100]        |
| Jiangxi                                                                   | 0.022                              | NA    | NA    | NA    | NA         | NA             | 23          | 300         | 2007          | AAS              | [90]         |
| Zhangjiang River, Jiangxi                                                 | 0.042                              | 0.007 | 0.034 | 0.050 | W/f        | C/O/H          | 5           | 30          | 2011          | CVAFS            | [101]        |
| Yangtze River, cross-provincial                                           | 0.012                              | 0.009 | 0.001 | 0.090 | W/f        | C/O/H          | 7           | 292         | 2012          | AFS              | [102]        |
| Yangtze River (27 cities middle/lower reaches), Hubei/Hunan/Anhui/Jiangsu | 0.023                              | 0.011 | 0.002 | 0.054 | W/f        | C/O/H          | 41          | 469         | 2011*         | AFS              | [103]        |
| Whole Yangtze River Basin, 11 provinces                                   | 0.012                              | 0.009 | 0.001 | 0.090 | W/f        | C/O/H          | 7           | 292         | 2003          | AFS              | [104]        |
| <b><i>Yellow River Basin</i></b>                                          |                                    |       |       |       |            |                |             |             |               |                  |              |
| Xiaolangdi Reservoir, Henan                                               | 0.099                              | 0.043 | 0.032 | 0.210 | W/f        | C/O/H          | 6           | 60          | 2012          | CVAFS            | [105]        |
| Luoyang and Xiaolangdi, Henan                                             | 0.020                              | 0.003 | 0.160 | 0.240 | W/f        | C/O/H          | 3           | 15          | 2009          | DC               | [106]        |
| Yinchuan Pond, Ningxia                                                    | 0.016                              | 0.023 | 0.003 | 0.056 | W/f        | C/O/H          | 3           | 156         | 1997          | CVAAS            | [107]        |
| Qingtongxia Reservoir, Ningxia                                            | 0.310                              | 0.180 | 0.050 | 0.740 | W/f        | C/O/H          | NA          | 55          | 1983          | NA               | [108]        |
| Yellow River in Ningxia                                                   | 0.247                              | 0.176 | 0.010 | 1.453 | W/f        | C/O/H          | 7           | 160         | 1988          | CVAAS            | [109]        |
| Ningxia                                                                   | 0.046                              | NA    | NA    | NA    | NA         | NA             | 23          | 300         | 2007          | AAS              | [90]         |
| Yellow River in Qinghai                                                   | 0.1                                | 0.12  | 0.003 | 0.31  | W/f        | C/O/H          | 3           | 53          | 2004-2005     | AFS              | [110]        |
| Yellow River Delta (Shandong)                                             | 0.102                              | 0.072 | 0.006 | 0.252 | W/f        | C/H/P          | 6           | 31          | 2008          | AFS              | [111]        |
| Shaanxi                                                                   | 0.065*                             | NA    | NA    | NA    | NA         | NA             | NA          | 144         | 1986          | MC               | [72]         |
| Shaanxi                                                                   | 0.220                              | 0.250 | 0.021 | 1.250 | W/f        | C/O/H          | NA          | 140         | 1996          | CVAAS            | [112]        |
| Gansu                                                                     | 0.050*                             | NA    | NA    | NA    | NA         | NA             | NA          | 45          | 1986          | MC               | [72]         |
| Sb mining area*, Hunan                                                    | 0.007                              | 0.004 | 0.001 | 0.048 | W/f        | O/H            | 8           | 73          | 2007-2008     | HG-AFS           | [113]        |
| Shanxi                                                                    | 0.008                              | NA    | NA    | NA    | NA         | NA             | 23          | 300         | 2007          | AAS              | [90]         |

***Songliao Basin***

| Locations                       | Total mercury /mg.kg <sup>-1</sup> |       |       |       | Fish types | Feeding habits | Species No. | Samples No. | Sampling year | Analysis methods | Data sources |
|---------------------------------|------------------------------------|-------|-------|-------|------------|----------------|-------------|-------------|---------------|------------------|--------------|
|                                 | Mean                               | SD    | Min   | Max   |            |                |             |             |               |                  |              |
| Songhua River, Heilongjiang     | 0.097                              | 0.029 | 0.016 | 0.350 | W/f        | C/O/H          | 6           | 72          | 1987          | NA               | [114]        |
| Songhua River, Heilongjiang     | 0.100*                             | 0.065 | 0.015 | 0.192 | W/f        | C/O/H          | 5           | 25          | 2001          | MC               | [115]        |
| Songhua River, Heilongjiang     | 0.150                              | 0.110 | 0.049 | 0.270 | W/f        | C/O/H          | 10          | 212         | 2002-2003     | CVAFS            | [116]        |
| Songhua River, Heilongjiang     | 0.141                              | 0.110 | 0.017 | 0.455 | W/f        | C/O/H          | 5           | 94          | 1987          | CVAAS            | [117]        |
| Songhua River, Heilongjiang     | 0.120*                             | 0.059 | 0.019 | 0.240 | W/f        | C/O/H          | 12          | 90          | 1990          | MC               | [118]        |
| Songhua River, Heilongjiang     | 0.112                              | 0.140 | 0.040 | 0.400 | W/f        | C/O/H          | NA          | 100         | 1987          | CVAAS            | [119]        |
| Songhua River, Heilongjiang     | 0.232                              | 0.062 | 0.001 | 0.460 | W/f        | C/O/H          | NA          | 362         | 2009          | ICP-MS           | [120]        |
| Songhua River, Heilongjiang     | 0.134                              | 0.055 | 0.043 | 0.268 | W/f        | C/O/H          | 3           | 283         | 2007-2008     | CVAAS            | [121]        |
| Songhua River, Heilongjiang     | 0.098                              | 0.087 | 0.019 | 0.380 | W/f        | C/O/H          | 5           | 60          | 1990          | CVAAS            | [122]        |
| Songhua River, Heilongjiang     | 0.168                              | 0.030 | 0.085 | 0.237 | W/f        | C/O/H          | 5           | 50          | 1991          | NA               | [123]        |
| Songhua River, Heilongjiang     | 0.137                              | 0.057 | 0.036 | 0.340 | W/f        | C/O/H          | 15          | 2800        | 1990          | CVAAS            | [124]        |
| Songhua River, Heilongjiang     | 0.115                              | 0.079 | 0.008 | 0.300 | W/f        | C/O/H          | 12          | 111         | 2005          | CVAAS            | [125]        |
| Songliao Basin (Heilongjiang)   | 0.155                              | 0.110 | 0.016 | 0.450 | W/f        | C/O/H          | 6           | 1287        | 1990          | CVAAS            | [126]        |
| Songliao Basin (Heilongjiang)   | 0.095                              | 0.130 | 0.020 | 0.320 | W/f        | C/O/H          | 9           | 116         | 2006          | AAS              | [127]        |
| Amur&Ussuri River, Heilongjiang | 0.110                              | 0.061 | 0.011 | 0.270 | W/f        | C/H            | 4           | 39          | 2011          | ICP-MS           | [128]        |
| Songhua River*, Heilongjiang    | 0.160                              | 0.050 | 0.050 | 0.490 | W/f        | C/O/H          | 6           | 1287        | 1990          | CVAAS            | [129]        |
| Tuofen River , Heilongjiang     | 0.048                              | 0.021 | 0.027 | 0.073 | W/f        | C/O/H          | 3           | 480         | 2011          | AFS              | [130]        |
| Sanjiang Plain (Heilongjiang)   | 0.068                              | 0.044 | 0.015 | 0.150 | W/f        | C/O/H          | 4           | 36          | 2010          | CVAAS            | [131]        |
| Heilongjiang                    | 0.015*                             | NA    | NA    | NA    | NA         | NA             | NA          | 130         | 1986          | MC               | [72]         |
| Songhua/Heilongjiang River*     | 0.122                              | 0.130 | 0.011 | 0.332 | W/f        | C/O/H          | 5           | 140         | 2007          | CVAFS            | [132]        |
| Songhua River*, Heilongjiang    | 0.042                              | 0.008 | 0.011 | 0.159 | W/f        | O              | 1           | 15          | 2007          | AFS              | [133]        |
| Heilongjiaing                   | 0.005                              | NA    | NA    | NA    | NA         | NA             | 23          | 300         | 2007          | AAS              | [90]         |
| Modanjiang River*, Heilongjiang | 0.011                              | 0.021 | 0.006 | 0.060 | F/f        | C/O/H          | NA          | 80          | 1999          | CVAAS            | [134]        |
| Yalvjiang River, Jilin          | 0.137                              | 0.100 | 0.001 | 0.340 | W/f        | C/O/H          | 16          | 58          | 1999          | CVAAS            | [135]        |
| Yichun River, Changchun, Jilin  | 0.096*                             | 0.055 | 0.028 | 0.136 | W/f        | C/O/H          | 3           | 15          | 2007          | MC               | [136]        |
| Changchun city, Jilin           | 0.055                              | 0.022 | 0.010 | 0.160 | W/f        | C/O/H          | 3           | 219         | 1988          | CVAAS            | [137]        |
| Second Songhua River*, Jilin    | 0.087                              | NA    | 0.002 | 0.660 | W/f        | C/O/H          | 10          | 158         | 2003-2004     | AFS              | [138]        |

| Locations                                 | Total mercury /mg.kg <sup>-1</sup> |       |       |       | Fish types | Feeding habits | Species No. | Samples No. | Sampling year | Analysis methods | Data sources |
|-------------------------------------------|------------------------------------|-------|-------|-------|------------|----------------|-------------|-------------|---------------|------------------|--------------|
|                                           | Mean                               | SD    | Min   | Max   |            |                |             |             |               |                  |              |
| Second Songhua River*, Jilin              | 0.270                              | NA    | NA    | NA    | W/f        | C/O/H          | 30          | 1122        | 1981          | CVAAS            | [139]        |
| Second Songhua River*, Jilin              | 0.139                              | 0.070 | 0.001 | 0.660 | W/f        | C/O/H          | 10          | 158         | 2006          | CVAAS            | [140]        |
| Second Songhua River*, Jilin              | 0.065                              | 0.009 | 0.029 | 0.082 | W/f        | C/O/H          | 11          | 164         | 2003-2004     | CVAAS            | [140]        |
| Songhua River*, Jilin                     | 0.032                              | 0.012 | 0.015 | 0.062 | W/f        | C/O/H          | 11          | 164         | 2005          | CVAAS            | [141]        |
| Chuangchun, Jilin                         | 0.041                              | 0.035 | 0.010 | 0.126 | NA         | NA             | NA          | 30          | 2002          | CVAAS            | [142]        |
| Jilin                                     | 0.249*                             | NA    | NA    | NA    | NA         | NA             | NA          | 174         | 1986          | MC               | [72]         |
| Chagan lake, Second Songhua River*, Jilin | 0.019                              | 0.020 | 0.005 | 0.047 | F/f        | C/O/H          | 9           | 56          | 2009          | AAS              | [143]        |
| Jinzhou, Liaoning                         | 0.170                              | 0.030 | 0.110 | 0.240 | W/f        | C/O/H          | 8           | 32          | 2008          | CVAAS            | [144]        |
| Liaoning Coastal Watersheds               | 0.400                              | 1.100 | 0.031 | 3.700 | W/f        | O              | 1           | 36          | 2008          | CVAFS            | [145]        |
| Liaoning                                  | 0.013                              | NA    | NA    | NA    | NA         | NA             | 23          | 300         | 2007          | AAS              | [90]         |
| <b><i>Taihu Lake Basin</i></b>            |                                    |       |       |       |            |                |             |             |               |                  |              |
| Taihu, Jiangsu                            | 0.022                              | 0.020 | 0.003 | 0.100 | W/f        | C/O/P          | 11          | 102         | 2009          | CVAAS            | [146]        |
| Taihu, Jiangsu                            | 0.064                              | 0.058 | 0.021 | 0.289 | W/f        | C/H            | 24          | 198         | 2009          | AFS              | [147]        |
| Suzhou, Jiangsu                           | 0.048                              | 0.039 | 0.001 | 0.160 | W/f        | C/O/H          | 3           | 18          | 2006          | AFS              | [148]        |
| Suzhou, Jiangsu                           | 0.035                              | 0.048 | 0.001 | 0.200 | W/f        | C/O/H          | 3           | 20          | 2011          | CVAFS            | [149]        |
| Suzhou, Jiangsu                           | 0.032                              | 0.013 | 0.006 | 0.185 | W/f        | C/O/H          | 9           | 45          | 1984-1985     | CVAAS            | [150]        |
| Suzhou, Jiangsu                           | 0.024                              | 0.011 | 0.008 | 0.035 | W/f        | C/O/H          | 5           | 100         | 2008-2009     | CVAAS            | [151]        |
| Jiangsu                                   | 0.036*                             | NA    | NA    | NA    | NA         | NA             | NA          | 122         | 1986          | MC               | [72]         |
| Lake and ponds, Shanghai                  | 0.064                              | 0.015 | 0.041 | 0.085 | W/f        | C/O/H          | 4           | 110         | 2001-2002     | AAS              | [152]        |
| Shanghai                                  | 0.022                              | 0.005 | 0.017 | 0.030 | W/f        | H              | 2           | 5           | 2004          | AAS              | [58]         |
| Shanghai                                  | 0.021                              | 0.021 | 0.001 | 0.065 | W/f/m      | C/O/H          | 11          | 55          | 2008-2009     | AFS              | [153]        |
| Shanghai                                  | 0.149*                             | NA    | NA    | NA    | NA         | NA             | NA          | 54          | 1986          | MC               | [72]         |
| shanghai                                  | 0.001                              | 0.002 | 0.001 | 0.003 | W/f        | C/O/H          | 5           | 15          | 2007          | CVAFS            | [154]        |
| Shanghai                                  | 0.028                              | NA    | NA    | NA    | NA         | NA             | 23          | 300         | 2007          | AAS              | [90]         |
| <b><i>Huaihe Basin</i></b>                |                                    |       |       |       |            |                |             |             |               |                  |              |
| 4 Lakes, Shandong                         | 0.125                              | 0.064 | 0.012 | 0.385 | W/f        | C/O/H          | 7           | 300         | 2001          | CVAAS            | [155]        |



| Locations                       | Total mercury /mg.kg <sup>-1</sup> |       |       |       | Fish types | Feeding habits | Species No. | Samples No. | Sampling year | Analysis methods | Data sources |
|---------------------------------|------------------------------------|-------|-------|-------|------------|----------------|-------------|-------------|---------------|------------------|--------------|
|                                 | Mean                               | SD    | Min   | Max   |            |                |             |             |               |                  |              |
| Weifang, Shandong               | 0.034                              | NA    | 0.001 | 0.049 | W/f/m      | NA             | NA          | 119         | 2010          | AFS              | [156]        |
| Qingdao, Shandong               | 0.089                              | 0.034 | 0.049 | 0.157 | W/f        | C/O/H          | 16          | 102         | 2007          | CVAAS            | [157]        |
| Andi Reservoir, Shandong        | 0.103                              | NA    | 0.048 | 0.584 | W/f/m      | C/O/H          | 3           | 31          | 1998          | CVAAS            | [158]        |
| Shandong                        | 0.048*                             | NA    | NA    | NA    | NA         | NA             | NA          | 95          | 1986          | MC               | [72]         |
| Henan                           | 0.010                              | NA    | NA    | NA    | NA         | NA             | 23          | 300         | 2007          | AAS              | [90]         |
| Lianyungang, Jiangsu            | 0.020                              | 0.016 | 0.010 | 0.100 | F/f        | C/O/H          | 6           | 50          | 2001          | CVAFS            | [159]        |
| <b><i>Haihe Basin</i></b>       |                                    |       |       |       |            |                |             |             |               |                  |              |
| Beijing                         | 0.019                              | 0.015 | 0.002 | 0.078 | W/f        | C/O/H          | 4           | 32          | 2006          | ICPMS            | [160]        |
| Baiyangdian Lake, Heibei        | 0.150                              | 0.050 | 0.016 | 0.610 | W/f        | C/O/P          | 10          | 13          | 2001          | ICPMS            | [161]        |
| Hebei                           | 0.011                              | NA    | NA    | NA    | NA         | NA             | 23          | 300         | 2007          | AAS              | [90]         |
| Beijing                         | 0.079*                             | NA    | NA    | NA    | NA         | NA             | NA          | 31          | 1986          | MC               | [72]         |
| Gaobeidian Lake, Beijing        | 0.179                              | 0.111 | 0.069 | 0.322 | W/f        | NA             | 5           | 19          | 2006          | AFS              | [162]        |
| Beijing                         | 0.110                              | 0.130 | 0.016 | 0.330 | W/f/m      | NA             | NA          | 9           | 2010          | AAS              | [163]        |
| Beijing                         | 0.050                              | 0.012 | NA    | NA    | W/f/m      | C/O/H          | 3           | 10          | 2004          | AFS              | [55]         |
| Beijing                         | 0.096                              | 0.062 | 0.005 | 0.190 | F/f        | C/O/H          | 13          | 50          | 1982-1983     | CVAAS            | [164]        |
| Beijing                         | 0.128                              | 0.167 | 0.007 | 0.400 | F/f        | C/O/H          | 4           | 64          | 1986-1987     | CVAAS            | [165]        |
| Tianjin                         | 0.038                              | 0.024 | 0.001 | 0.100 | F/f        | NA             | NA          | 50          | 1996-1999     | NA               | [166]        |
| <b><i>Pearl River Basin</i></b> |                                    |       |       |       |            |                |             |             |               |                  |              |
| Jiangmen, Guangdong             | 0.043                              | NA    | 0.002 | 0.132 | W/f        | C/O/H          | 8           | 80          | 1993          | CVAFS            | [37]         |
| Zhuhai, Guangdong               | 0.043                              | 0.050 | 0.001 | 0.220 | W/f        | C/O/H          | 9           | 36          | 1996-1997     | CVAAS            | [42]         |
| Beijiang, Guangdong             | 0.035                              | 0.012 | 0.025 | 0.046 | W/f        | C/O/H          | 4           | 17          | 2006          | AFS              | [167]        |
| Pearl River Delta (Guangdong)   | 0.032                              | 0.120 | 0.002 | 0.180 | W/f        | C/O/H          | 16          | 48          | 2009          | CVAFS            | [168]        |
| Pearl River Delta (Guangdong)   | 0.059                              | 0.046 | 0.003 | 0.210 | W/f        | C/O/H          | 8           | 32          | 2013*         | AAS              | [169]        |
| Jiangmen, Guangdong             | 0.025                              | 0.022 | 0.002 | 0.190 | W/f        | C/O/H          | 10          | 30          | 2009          | AFS              | [40]         |
| Pearl River Delta, Guangdong    | 0.041                              | 0.024 | 0.007 | 0.078 | F/f        | C/O/H          | 5           | 54          | 2008-2009     | CVAAS            | [170]        |
| Pearl River Delta(Guangdong)    | 0.024                              | 0.016 | 0.004 | 0.054 | F/f        | C/O/H          | 6           | 30          | 1995          | CVAAS            | [171]        |
| Pearl River Delta (Guangdong)   | 0.030                              | 0.024 | 0.005 | 0.070 | F/f        | C/O/H          | 5           | 44          | 2008-2009     | CVAAS            | [172]        |

| Locations                                    | Total mercury /mg.kg <sup>-1</sup> |       |       |       | Fish types | Feeding habits | Species No. | Samples No. | Sampling year | Analysis methods | Data sources |
|----------------------------------------------|------------------------------------|-------|-------|-------|------------|----------------|-------------|-------------|---------------|------------------|--------------|
|                                              | Mean                               | SD    | Min   | Max   |            |                |             |             |               |                  |              |
| 11 Coastal cities, Guangdong                 | 0.028                              | 0.080 | 0.001 | 0.120 | F/f        | C/O/H          | 7           | 177         | 2005          | CVAFS            | [46]         |
| 11 cities, Guangdong                         | 0.035                              | 0.041 | 0.035 | 0.130 | F/f        | C/O/H          | 7           | 210         | 2004-2005     | CVAFS            | [44]         |
| Pearl river delta (5 cities in Guangdong)    | 0.047                              | 0.063 | 0.010 | 0.220 | F/f        | NA             | 4           | 57          | 2002          | AAS              | [35]         |
| Guangzhou, Guangdong                         | 0.032                              | NA    | 0.002 | 0.390 | W/f/m      | NA             | NA          | 62          | 2011          | CVAFS            | [173]        |
| 11 cities, Guangdong                         | 0.064                              | 0.025 | 0.007 | 0.250 | F/m        | C/O/H          | 3           | 90          | 2004          | CVAFS            | [44]         |
| 11 Coastal cities, Guangdong                 | 0.060                              | 0.070 | 0.059 | 0.072 | F/m        | C              | 3           | 84          | 2005          | CVAFS            | [46]         |
| Guangzhou, Guangdong                         | 0.078                              | 0.073 | 0.005 | 0.176 | F/f/m      | C/O/H          | 12          | 96          | 2010          | CVAFS            | [174]        |
| Guangxi                                      | 0.024*                             | NA    | NA    | NA    | NA         | NA             | NA          | 62          | 1986          | MC               | [72]         |
| Guangxi                                      | 0.041                              | NA    | NA    | NA    | NA         | NA             | 23          | 300         | 2007          | AAS              | [90]         |
| Wuzhou, Guangxi                              | 0.008                              | NA    | 0.005 | 0.020 | W/f        | NA             | NA          | 15          | 2009-2010     | CVAFS            | [175]        |
| Hong Kong market                             | 0.180                              | 0.100 | 0.070 | 0.340 | W/f        | C/O/H          | 10          | 33          | 2004          | AAS              | [35]         |
| Hengyang, Hunan                              | 0.091                              | 0.080 | 0.016 | 0.400 | W/f        | NA             | 5           | 8           | 2010          | CVAFS            | [43]         |
| Hong Kong                                    | 0.006                              | 0.003 | 0.003 | 0.011 | W/f        | C/O/H          | 6           | 24          | 1995          | CVAAS            | [171]        |
| Hong Kong                                    | 0.063                              | 0.060 | 0.003 | 0.470 | W/f/m      | C/O/H          | 89          | 277         | 2008          | AAS              | [176]        |
| Hong Kong                                    | 0.087                              | 0.065 | 0.006 | 0.230 | W/f/m      | NA             | 15          | 27          | 1995          | CVAAS            | [177]        |
| Around Hong Kong and adjacent mainland China | 0.091                              | 0.028 | 0.019 | 0.180 | F/m        | C              | 3           | 85          | 2011*         | CVAAS            | [178]        |
| Hong Kong                                    | 0.090                              | 0.030 | 0.022 | 0.140 | F/f/m      | C/O/H          | 3           | 83          | 2011*         | CVAAS            | [178]        |
| <b><i>The Rest Mainland Area</i></b>         |                                    |       |       |       |            |                |             |             |               |                  |              |
| 8 alpine lakes, Tibet                        | 0.145                              | 0.195 | 0.010 | 0.477 | W/f        | C/O/H          | 7           | 62          | 2004          | AFS              | [179]        |
| 7 rivers and 6 lakes, Tibet                  | 0.100                              | 0.150 | 0.025 | 1.218 | W/f        | C/O/H          | 13          | 166         | 2009-2010     | CVAFS            | [180]        |
| Niyang River, Tibet                          | 0.026                              | 0.010 | 0.017 | 0.044 | W/f        | O              | 2           | 8           | 2007          | AFS              | [181]        |
| Urumqi, Xinjiang                             | 0.011                              | 0.012 | 0.003 | 0.038 | W/f        | C/O/H          | NA          | 20          | 2002          | CVAFS            | [182]        |
| Urumqi, Xinjiang                             | 0.049                              | 0.037 | NA    | NA    | W/f        | C/O/H          | NA          | 30          | 2002-2004     | CVAAS            | [183]        |
| Xinjiang                                     | 0.015*                             | NA    | NA    | NA    | NA         | NA             | NA          | 52          | 1986          | MC               | [72]         |
| Shihezi, Xinjiang                            | 0.300                              | 0.220 | 0.014 | 0.900 | W/f/m      | C/O/H          | 4           | 18          | 2006          | CVAAS            | [184]        |

| Locations                                                   | Total mercury /mg.kg <sup>-1</sup> |       |       |       | Fish types | Feeding habits | Species No. | Samples No. | Sampling year | Analysis methods | Data sources |
|-------------------------------------------------------------|------------------------------------|-------|-------|-------|------------|----------------|-------------|-------------|---------------|------------------|--------------|
|                                                             | Mean                               | SD    | Min   | Max   |            |                |             |             |               |                  |              |
| Qiandaohu Reservoir, Zhejiang                               | 0.082                              | 0.083 | 0.011 | 0.120 | W/f        | C/O            | 7           | 7           | 2008          | CVAFS            | [185]        |
| Taiwan                                                      | 0.080                              | 0.040 | 0.008 | 0.025 | W/f        | O/H            | 2           | 12          | 2004          | AAS              | [28]         |
| Taiwan                                                      | 0.18                               | 0.23  | 0.005 | 4.69  | W/f/m      | C/O/H          | 15          | 299         | 2003-2004     | CVAAS            | [186]        |
| Gaohong *, Zhejiang                                         | 0.060                              | 0.054 | 0.014 | 0.170 | W/f        | C/O/H          | 7           | 70          | 2011          | AAS              | [187]        |
| Zhejiang                                                    | 0.051*                             | NA    | NA    | NA    | NA         | NA             | NA          | 130         | 1986          | MC               | [72]         |
| Changnan, Zhejiang                                          | 0.026                              | NA    | NA    | NA    | F/f        | NA             | 1           | 20          | 2004          | CVAFS            | [188]        |
| Zhoushan, Zhejiang                                          | 0.260                              | 0.081 | 0.010 | 0.660 | W/f/m      | C/O            | 10          | 148         | 2006-2007     | CVAAS            | [189]        |
| Hulun Buir Grassland, Inner Mongolia                        | 0.042                              | 0.023 | 0.005 | 0.170 | W/f        | C/O/H          | 9           | 90          | 1983          | CVAAS            | [190]        |
| Yunnan                                                      | 0.011*                             | NA    | NA    | NA    | NA         | NA             | NA          | 64          | 1986          | MC               | [72]         |
| Fujian                                                      | 0.012                              | NA    | NA    | NA    | NA         | NA             | 23          | 300         | 2007          | AAS              | [90]         |
| Tingjiang river (copper mine)*, Fujian                      | 0.006                              | 0.002 | 0.003 | 0.009 | W/f        | H              | 1           | 24          | 2012*         | ICPMS            | [191]        |
| Fujian                                                      | 0.059*                             | NA    | NA    | NA    | NA         | NA             | NA          | 89          | 1986          | MC               | [72]         |
| Fujian coastline farming sites                              | 0.096                              | 0.064 | 0.036 | 0.251 | F/m        | C              | 3           | 69          | 2011          | CVAFS            | [192]        |
| Sanduwan Bay, Fujian                                        | 0.032                              | 0.006 | 0.012 | 0.084 | F/m        | NA             | 3           | 31          | 2004          | AFS              | [193]        |
| 6 Fujian coastal sites                                      | 0.096                              | 0.061 | 0.010 | 0.310 | F/m        | C/O/H          | 5           | 196         | 2009          | CVAFS            | [194]        |
| Meizhou, Guangdong                                          | NA                                 | NA    | 0.002 | 0.031 | W/f/m      | NA             | NA          | 10          | 2009          | CVAAS            | [195]        |
| Daya/Hailing Bay, Guangdong                                 | 0.060                              | 0.040 | 0.020 | 0.160 | F/m        | C              | 2           | 99          | 2007-2008     | AFS              | [196]        |
| <b><i>Cross-regional</i></b>                                |                                    |       |       |       |            |                |             |             |               |                  |              |
| Beijing/Shanghai/Jiangsu/Guangdong/Sichuan                  | 0.030                              | 0.050 | 0.002 | 0.160 | W/f        | C/O/H          | NA          | 52          | 1992          | CVAAS            | [197]        |
| 9 Coastal cities along Bohai/Yellow Sea and East China Sea) | 0.023                              | 0.011 | 0.007 | 0.053 | W/m        | C              | 3           | 75          | 2008          | AFS              | [198]        |
| China and other Asian markets                               | 0.062                              | 0.053 | 0.001 | 1.150 | F/W/f/m    | NA             | 19          | 282         | 2007          | CVAAS            | [199]        |
| Beijing/Shanghai/Jiangsu/Sichuan/Guangdong                  | 0.030                              | NA    | 0.002 | 0.158 | F/W/f/m    | C/O/H          | NA          | 505         | 2008-2010     | AAS              | [200]        |

| Locations                                                | Total mercury /mg.kg <sup>-1</sup> |       |       |       | Fish types | Feeding habits | Species No. | Samples No. | Sampling year | Analysis methods | Data sources |
|----------------------------------------------------------|------------------------------------|-------|-------|-------|------------|----------------|-------------|-------------|---------------|------------------|--------------|
|                                                          | Mean                               | SD    | Min   | Max   |            |                |             |             |               |                  |              |
| 5 coastal areas<br>(Guangdong/Shanghai/Jiangsu/Liaoning) | 0.054                              | 0.120 | 0.006 | 0.590 | F/W/f/m    | C/O/H          | 22          | 400         | 2007          | ICPMS            | [201]        |

**Table S4** A list of fish species names (freshwater fish and marine fish) in the Chinese aquatic ecosystems. \*The whole dataset covers >600 fish species, with >230 species for freshwater fish and >370 species for marine fish (only within the English literature).

| ID                     | Name of fish species*                                           | Location           | Source |
|------------------------|-----------------------------------------------------------------|--------------------|--------|
| <b>Freshwater fish</b> |                                                                 |                    |        |
| 1                      | <i>Aristichthys nobilis</i> (bighead carp)                      | Gaohong, Zhejiang  | [187]  |
| 2                      | <i>Carassius carassius</i> (crucian carp)                       | Gaohong, Zhejiang  | [187]  |
| 3                      | <i>Ctenopharyngodon idellus</i> (grass carp)                    | Gaohong, Zhejiang  | [187]  |
| 4                      | <i>Channa argus</i> (northern snakehead)                        | Gaohong, Zhejiang  | [187]  |
| 5                      | <i>Misgurnus anguillicaudatus</i> (oriental weatherfish)        | Gaohong, Zhejiang  | [187]  |
| 6                      | <i>Periophthalmus argentilineatus</i> (mud skipper)             | Gaohong, Zhejiang  | [187]  |
| 7                      | <i>Pelteobagrus fulvidraco</i> (yellow head catfish)            | Gaohong, Zhejiang  | [187]  |
| 8                      | <i>Hypophthalmichthys molitrix</i>                              | Banan              | [92]   |
| 9                      | <i>Pseudobagrus fulvidraco</i>                                  | Banan              | [92]   |
| 10                     | <i>Hemiculter nigromarginis</i>                                 | Banan              | [92]   |
| 11                     | <i>Ctenopharyngodon idellus</i>                                 | Banan              | [92]   |
| 12                     | <i>Xenocypris argentea</i>                                      | Banan              | [92]   |
| 13                     | <i>Silurus soldatovi meridionalis</i>                           | Banan              | [92]   |
| 14                     | <i>Varicorhinus simus</i>                                       | Banan              | [92]   |
| 15                     | <i>Cyprinus carpio</i>                                          | Banan              | [92]   |
| 16                     | <i>Carassius auratus</i>                                        | Banan              | [92]   |
| 17                     | <i>Coreius heterodon</i>                                        | Banan              | [92]   |
| 18                     | <i>Coreius guichenoti</i>                                       | Banan              | [92]   |
| 19                     | <i>Leiocassis longirostris</i>                                  | Banan              | [92]   |
| 20                     | <i>Leiocassis crassilabris</i>                                  | Banan              | [92]   |
| 21                     | <i>Leptobotia elongata</i>                                      | Banan              | [92]   |
| 22                     | <i>Rhinogobio typus</i>                                         | Banan              | [92]   |
| 23                     | <i>Saurogobio dabryi</i>                                        | Banan              | [92]   |
| 24                     | <i>Hemimyzon abbreviata</i>                                     | Banan              | [92]   |
| 25                     | <i>Rhinogobio cylindricus</i>                                   | Banan              | [92]   |
| 26                     | <i>Hemiculter leuciscus</i>                                     | Banan              | [92]   |
| 27                     | <i>Lateolabrus japonicus</i> (weever)                           | Yellow River Delta | [111]  |
| 28                     | <i>Chaeturichthys sitgmatias</i> (catfish),                     | Yellow River Delta | [111]  |
| 29                     | <i>Cyprinus carpio</i> Linnaeus (common carp)                   | Yellow River Delta | [111]  |
| 30                     | <i>Hypophthalmichthys molitrix</i> (Silver carp),               | Yellow River Delta | [111]  |
| 31                     | <i>Liza haematocheila</i> (Redeye mullet)                       | Yellow River Delta | [111]  |
| 32                     | <i>Acanthogobius hasta</i> (javelin goby)                       | Yellow River Delta | [111]  |
| 33                     | <i>Carassius auratus</i> (Crucian)                              | Hunan              | [202]  |
| 34                     | <i>Hemiculter leuciscus</i> (Crucian, wild carp)                | Hunan              | [202]  |
| 35                     | <i>Ctenopharyngodon idellus</i> (Crucian, grass carp)           | Hunan              | [202]  |
| 36                     | <i>Mylopharyngodon Peters</i> (Grass carp, Crucian, herring)    | Hunan              | [202]  |
| 37                     | <i>Cyprinus carpio</i> (Grass carp, Crucian, carp)              | Hunan              | [202]  |
| 38                     | <i>Aristichthys mobilis</i> (Grass carp, Crucian, bighead carp) | Hunan              | [202]  |
| 39                     | <i>Ctenopharyngodon idellus</i> (Grass carp)                    | Taihu lake         | [146]  |

| ID | Name of fish species*                                        | Location            | Source |
|----|--------------------------------------------------------------|---------------------|--------|
| 40 | <i>Hypophthalmichthys molitrix</i> (Silver carp)             | Taihu lake          | [146]  |
| 41 | <i>A. nobilis</i> (Terch)                                    | Taihu lake          | [146]  |
| 42 | <i>C. carpio</i> Linnaeus (Common carp)                      | Taihu lake          | [146]  |
| 43 | <i>C. auratus</i> Linnaeus(Crucian carp)                     | Taihu lake          | [146]  |
| 44 | <i>C. auratus</i> Linnaeus(Crucian carp (Cultured))          | Taihu lake          | [146]  |
| 45 | <i>Mylopharyngodon piceus</i> (Black carp)                   | Taihu lake          | [146]  |
| 46 | <i>Neosalanx tangkahkeii taihuensis</i> Chen (Whitebai)      | Taihu lake          | [146]  |
| 47 | <i>Ophiocephalus argus cantor</i> (Argus snakehead fish)     | Taihu lake          | [146]  |
| 48 | <i>Erythroculter</i> Mongolian Basilewsky (Mongolian culter) | Taihu lake          | [146]  |
| 49 | <i>E. ilishaeformis</i> Bleeker (Topmouth culter)            | Taihu lake          | [146]  |
| 50 | <i>Silurus asotus</i> (Catfish)                              | Taihu lake          | [146]  |
| 51 | <i>Carassius auratus</i> (Crucian)                           | Hunan               | [96]   |
| 52 | <i>Hemiculter leucisculus</i> (Wild carp)                    | Hunan               | [96]   |
| 53 | <i>Cyprinus carpio</i> Linnaeu                               | Amur &Ussuri        | [128]  |
| 54 | <i>Carassius auratu</i> gibeliv                              | Amur &Ussuri        | [128]  |
| 55 | <i>Parasiburusasvtus</i>                                     | Amur &Ussuri        | [128]  |
| 56 | <i>Pelteobagrus fulvidraco</i>                               | Amur &Ussuri        | [128]  |
| 57 | <i>Mylopharyngodon piceus</i>                                | Yangtze river basin | [103]  |
| 58 | <i>Ctenopharyngodon idellus</i>                              | Yangtze river basin | [103]  |
| 59 | <i>Squaliobarbus curriculus</i> (Rich.)                      | Yangtze river basin | [103]  |
| 60 | <i>Hypophthalmichthys molitrix</i>                           | Yangtze river basin | [103]  |
| 61 | <i>Aristichthys nobilis</i> (Rich.)                          | Yangtze river basin | [103]  |
| 62 | <i>Cyprinus carpio</i> Linnaeus                              | Yangtze river basin | [103]  |
| 63 | <i>Carassius auratus auratus</i>                             | Yangtze river basin | [103]  |
| 64 | <i>Sinibrama macrops</i>                                     | Yangtze river basin | [103]  |
| 65 | <i>Erythroculter ilishaeformis</i> (Bleeker)                 | Yangtze river basin | [103]  |
| 66 | <i>Erythroculter mongolicus</i> (Basilewsky)                 | Yangtze river basin | [103]  |
| 67 | <i>Hemiculter leucisculus</i> (Basil.)                       | Yangtze river basin | [103]  |
| 68 | <i>Pseudorasbora parve</i> (Temminck et Schlegel)            | Yangtze river basin | [103]  |
| 69 | <i>Sarcocheilichthys nigripinnis nigripinnis</i> (Günther)   | Yangtze river basin | [103]  |
| 70 | <i>Coreius heterodon</i> (Bleeker)                           | Yangtze river basin | [103]  |
| 71 | <i>Coreius guichenoti</i>                                    | Yangtze river basin | [103]  |
| 72 | <i>Rhinogobio cylindricus</i> Gunther                        | Yangtze river basin | [103]  |
| 73 | <i>Rhinogobio ventralis</i> Savage et Dabry                  | Yangtze river basin | [103]  |
| 74 | <i>Rhinogobio typus</i> Bleeker                              | Yangtze river basin | [103]  |
| 75 | <i>Platysmacheilus longibarbatu</i> s Lo                     | Yangtze river basin | [103]  |
| 76 | <i>Leptobotia elongata</i> (Bleeker)                         | Yangtze river basin | [103]  |
| 77 | <i>Misgurnus anguillicaudatus</i>                            | Yangtze river basin | [103]  |
| 78 | <i>Hemimyzon abbreviata</i> (güntheri)                       | Yangtze river basin | [103]  |
| 79 | <i>Pelteobagrus fulvidraco</i>                               | Yangtze river basin | [103]  |
| 80 | <i>Leiocassis longirostris</i> Günther                       | Yangtze river basin | [103]  |
| 81 | <i>Leiocassis crassirostris</i> Regan                        | Yangtze river basin | [103]  |
| 82 | <i>Mystus macropterus</i> (Bleeker)                          | Yangtze river basin | [103]  |
| 83 | <i>Silurus asotus</i> Linnaeus                               | Yangtze river basin | [103]  |

| ID  | Name of fish species*                                | Location            | Source |
|-----|------------------------------------------------------|---------------------|--------|
| 84  | <i>Coilia nasus</i> Schlegel                         | Yangtze river basin | [103]  |
| 85  | <i>Coilia brachygnathus</i> Kreyenberg et Pappenheim | Yangtze river basin | [103]  |
| 86  | <i>Coilia mystus</i> (Linnaeus)                      | Yangtze river basin | [103]  |
| 87  | <i>Lateolabrax japonicus</i>                         | Yangtze river basin | [103]  |
| 88  | <i>Siniperca scherzeri</i> steindachner              | Yangtze river basin | [103]  |
| 89  | <i>Odontobutis obscurus</i>                          | Yangtze river basin | [103]  |
| 90  | <i>Channa argus</i> (Cantor)                         | Yangtze river basin | [103]  |
| 91  | <i>Hemiramphys kurumeus</i> Jordan et Starks         | Yangtze river basin | [103]  |
| 92  | <i>collichthys lucidus</i> (Richardson)              | Yangtze river basin | [103]  |
| 93  | <i>Pampus argenteus</i>                              | Yangtze river basin | [103]  |
| 94  | <i>Cymoglossus robustus</i>                          | Yangtze river basin | [103]  |
| 95  | <i>Palaemon</i> (E.) <i>carinicauda</i> Holthuis     | Yangtze river basin | [103]  |
| 96  | <i>Macrobrachium nipponense</i>                      | Yangtze river basin | [103]  |
| 97  | <i>Eriocheir sinensis</i>                            | Yangtze river basin | [103]  |
| 98  | Carp                                                 | China               | [90]   |
| 99  | Crucian carp                                         | China               | [90]   |
| 100 | Catfish                                              | China               | [90]   |
| 101 | Yellow catfish                                       | China               | [90]   |
| 102 | Spanish mackerel                                     | China               | [90]   |
| 103 | Hairtail                                             | China               | [90]   |
| 104 | Bluntnose bream                                      | China               | [90]   |
| 105 | Litter yellow croaker                                | China               | [90]   |
| 106 | Pomfret                                              | China               | [90]   |
| 107 | Chub                                                 | China               | [90]   |
| 108 | Finless eel                                          | China               | [90]   |
| 109 | Sleeve-fish                                          | China               | [90]   |
| 110 | <i>Silurus meridionalis</i> Chen                     | Yangtze river       | [64]   |
| 111 | <i>Leptobotia elongata</i>                           | Yangtze river       | [64]   |
| 112 | <i>Leiocassis crassilabris</i> Gunther               | Yangtze river       | [64]   |
| 113 | <i>Mystus macropterus</i>                            | Yangtze river       | [64]   |
| 114 | <i>Opsariichthys bidens</i>                          | Yangtze river       | [64]   |
| 115 | <i>Siniperca kneri</i> Garman                        | Yangtze river       | [64]   |
| 116 | <i>Liobagrus nigricauda</i>                          | Yangtze river       | [64]   |
| 117 | <i>pseudobagrus pratti</i>                           | Yangtze river       | [64]   |
| 118 | <i>Ameiurus melas</i>                                | Yangtze river       | [64]   |
| 119 | <i>Zacco platypus</i>                                | Yangtze river       | [64]   |
| 120 | Cyprinidae                                           | Yangtze river       | [64]   |
| 121 | <i>Rhinogobio typus</i>                              | Yangtze river       | [64]   |
| 122 | <i>Pseudobagrus vachelli</i>                         | Yangtze river       | [64]   |
| 123 | <i>Pelteobagrus nitidus</i>                          | Yangtze river       | [64]   |
| 124 | <i>Pseudolaubuca sinensis</i>                        | Yangtze river       | [64]   |
| 125 | <i>Hemiculter leucisculus</i>                        | Yangtze river       | [64]   |
| 126 | <i>Tor brevifilis</i>                                | Yangtze river       | [64]   |
| 127 | <i>Saurogobio dabryi</i>                             | Yangtze river       | [64]   |

| ID  | Name of fish species*                              | Location            | Source |
|-----|----------------------------------------------------|---------------------|--------|
| 128 | <i>Rhinogobio ventralis</i> Sauvage et Dabry       | Yangtze river       | [64]   |
| 129 | <i>Squalidus argentatus</i>                        | Yangtze river       | [64]   |
| 130 | <i>Glyptothorax sinensis</i> Regan                 | Yangtze river       | [64]   |
| 131 | <i>gobiobotia ichangensis</i> Fang                 | Yangtze river       | [64]   |
| 132 | <i>Coreius heterodon</i>                           | Yangtze river       | [64]   |
| 133 | <i>Mylopharyngodon piceus</i>                      | Yangtze river       | [64]   |
| 134 | <i>Rhinogobio cylindricus</i> Gunther              | Yangtze river       | [64]   |
| 135 | <i>Hemiculterella sauvagei</i>                     | Yangtze river       | [64]   |
| 136 | <i>Belligobio nummifer</i>                         | Yangtze river       | [64]   |
| 137 | <i>Spinibarbus sinensis</i> Bleeker                | Yangtze river       | [64]   |
| 138 | <i>Carassius auratus</i>                           | Yangtze river       | [64]   |
| 139 | <i>Garra pingi pingi</i>                           | Yangtze river       | [64]   |
| 140 | <i>Botia superciliaris</i> Gunther                 | Yangtze river       | [64]   |
| 141 | <i>Pseudogyrincheilus procheilus</i>               | Yangtze river       | [64]   |
| 142 | <i>Onychostoma sima</i>                            | Yangtze river       | [64]   |
| 143 | <i>Acrossocheilus yunnanensis</i>                  | Yangtze river       | [64]   |
| 144 | <i>Lepturichthys fimbriata</i> Gunther             | Yangtze river       | [64]   |
| 145 | <i>Jinshaia sinensis</i>                           | Yangtze river       | [64]   |
| 146 | Golden carp                                        | Qiandaohu reservoir | [185]  |
| 147 | <i>H. malitrix</i> (silver carp)                   | Qiandaohu reservoir | [185]  |
| 148 | <i>H. nobilis</i> R.(bighead carp)                 | Qiandaohu reservoir | [185]  |
| 149 | <i>Chanodichthys mongolicus</i> (Mongolian redfin) | Qiandaohu reservoir | [185]  |
| 150 | <i>C. erythropterus</i> B. (predatory carp)        | Qiandaohu reservoir | [185]  |
| 151 | <i>Ctenopharyngodon idellus</i> (grass carp)       | Qiandaohu reservoir | [185]  |
| 152 | <i>Pelteobagrus fulvidraco</i> (yellow catfish)    | Qiandaohu reservoir | [185]  |
| 153 | <i>Siniperca</i> spp. (Chinese perch)              | Qiandaohu reservoir | [185]  |
| 154 | <i>Channa argus</i> (Snakehead)                    | Qiandaohu reservoir | [185]  |
| 155 | <i>S. asotus</i> (Amur catfish)                    | Qiandaohu reservoir | [185]  |
| 156 | <i>Ctenopharyngodon idellus</i> (Grass carp)       | Pearl River Delta   | [169]  |
| 157 | <i>Aristichthys nobilis</i> (Bighead carp)         | Pearl River Delta   | [169]  |
| 158 | <i>Siniperca chuatsi</i> (Mandarin fish)           | Pearl River Delta   | [169]  |
| 159 | <i>Channa argus</i> (Northern snakehead)           | Pearl River Delta   | [169]  |
| 160 | <i>Lepomis macrochirus</i> (Largemouth bass)       | Pearl River Delta   | [169]  |
| 161 | <i>Carassius auratus</i> (Crucian)                 | Pearl River Delta   | [169]  |
| 162 | <i>Cyprinus carpio</i> (Common carp)               | Pearl River Delta   | [169]  |
| 163 | <i>Squalius cephalus</i> (Chub)                    | Pearl River Delta   | [169]  |
| 164 | Silver carp                                        | Yangtze river       | [104]  |
| 165 | Grass carp                                         | Yangtze river       | [104]  |
| 166 | Crucian carp                                       | Yangtze river       | [104]  |
| 167 | Common carp                                        | Yangtze river       | [104]  |
| 168 | Bronze gudgeon                                     | Yangtze river       | [104]  |
| 169 | Catfish                                            | Yangtze river       | [104]  |
| 170 | Yellow-head catfish                                | Yangtze river       | [104]  |
| 171 | <i>Oxygymnocypris stewartii</i>                    | Niyang river, Tibet | [181]  |



| ID  | Name of fish species*                                | Location                      | Source |
|-----|------------------------------------------------------|-------------------------------|--------|
| 172 | <i>Schizopygopsis younghusbaddi</i>                  | Niyang river, Tibet           | [181]  |
| 173 | <i>Cyprinus carpio</i> (Common carp)                 | Baihu reservoir               | [203]  |
| 174 | <i>Hypophthalmichthys nobilis</i> (Big-head carp)    | Baihu reservoir               | [203]  |
| 175 | <i>Hypophthalmichthys molitrix</i> (Silver carp)     | Baihu reservoir               | [203]  |
| 176 | <i>Carassius carassius</i> (Crucian carp)            | Baihu reservoir               | [203]  |
| 177 | <i>Ctenopharyngodon idella</i> (Grass carp)          | Baihu reservoir               | [203]  |
| 178 | <i>Hemiculter bleekeri bleekeri</i>                  | Baihu reservoir               | [203]  |
| 179 | <i>Pelteobagrus fulvidraco</i> (yellow-head catfish) | Baihu reservoir               | [203]  |
| 180 | <i>Abbottina obtusirostris</i>                       | Baihu reservoir               | [203]  |
| 181 | <i>Clarias fuscus</i> (catfish)                      | Baihu reservoir               | [203]  |
| 182 | Tilapia                                              | Pearl River Delta & Hong Kong | [171]  |
| 183 | Common carp                                          | Pearl River Delta & Hong Kong | [171]  |
| 184 | Big head                                             | Pearl River Delta & Hong Kong | [171]  |
| 185 | Silver carp                                          | Pearl River Delta & Hong Kong | [171]  |
| 186 | Grass carp                                           | Pearl River Delta & Hong Kong | [171]  |
| 187 | Black bass                                           | Pearl River Delta & Hong Kong | [171]  |
| 188 | <i>Hemiculter leucisculus</i>                        | Baiyangdian lake              | [161]  |
| 189 | <i>Channa argus</i>                                  | Baiyangdian lake              | [161]  |
| 190 | <i>Pseudobagrus fulvidraco</i>                       | Baiyangdian lake              | [161]  |
| 191 | <i>Carassius auratus</i>                             | Baiyangdian lake              | [161]  |
| 192 | <i>Misgurnus anguillicaudatus</i>                    | Baiyangdian lake              | [161]  |
| 193 | <i>Silurus asotus</i>                                | Baiyangdian lake              | [161]  |
| 194 | <i>Rhodeus atremius</i>                              | Baiyangdian lake              | [161]  |
| 195 | <i>Aplocheilichthys latipes</i>                      | Baiyangdian lake              | [161]  |
| 196 | <i>Fluta alba</i>                                    | Baiyangdian lake              | [161]  |
| 197 | <i>Hypophthalmichthys molitrix</i>                   | Baiyangdian lake              | [161]  |
| 198 | <i>Parasilurus asotus</i> (Catfish)                  | Hongjiadu reservoir           | [63]   |
| 199 | <i>Cyprinus carpio</i> (Common carp)                 | Hongjiadu reservoir           | [63]   |
| 200 | <i>Carassius auratus</i> (Crucian carp)              | Hongjiadu reservoir           | [63]   |
| 201 | <i>Hemiculter leuciculus</i>                         | Hongjiadu reservoir           | [63]   |
| 202 | <i>Varicorhinus lini</i>                             | Hongjiadu reservoir           | [63]   |
| 203 | <i>Ctenopharyngodon idellus</i> (Grass carp)         | Hongjiadu reservoir           | [63]   |
| 204 | <i>Aristichthys nobilis</i> (Big head)               | Hongkong                      | [177]  |
| 205 | <i>Ctenopharyngodon idellus</i> (Grass carp)         | Hongkong                      | [177]  |
| 206 | <i>Cirrhinus molitorella</i> (Mud carp)              | Hongkong                      | [177]  |
| 207 | <i>Micropterus</i> sp. (Freshwater grouper)          | Hongkong                      | [177]  |
| 208 | <i>Morone saxatilis</i> x <i>chrysops</i>            | Asian market                  | [199]  |
| 209 | <i>Aristichthys nobilis</i>                          | Asian market                  | [199]  |
| 210 | <i>Ictiobus</i> spp.                                 | Asian market                  | [199]  |
| 211 | <i>Callinectes sapidus</i>                           | Asian market                  | [199]  |
| 212 | <i>Cirrhinus molitorella</i>                         | Asian market                  | [199]  |
| 213 | <i>Anguilla japonica</i>                             | Asian market                  | [199]  |
| 214 | <i>Dormitator maculatus</i>                          | Asian market                  | [199]  |
| 215 | <i>Oreochromis</i> spp.                              | Asian market                  | [199]  |

| ID  | Name of fish species*                                    | Location               | Source |
|-----|----------------------------------------------------------|------------------------|--------|
| 216 | <i>Coreius heterodon</i>                                 | Three Gorges Reservoir | [79]   |
| 217 | <i>Cultrichtys erythropterus</i>                         | Three Gorges Reservoir | [79]   |
| 218 | <i>Culter mongolicus mongolicus</i>                      | Three Gorges Reservoir | [79]   |
| 219 | <i>Cyprinus carpio</i>                                   | Three Gorges Reservoir | [79]   |
| 220 | <i>Silurus asotus</i>                                    | Three Gorges Reservoir | [79]   |
| 221 | <i>Cirrhina molitorella</i> (Mud carp)                   | Pearl River Delta      | [172]  |
| 222 | <i>ctenopharyngodon idellus</i> (Grass carp)             | Pearl River Delta      | [172]  |
| 223 | <i>Aristichthys nobilis</i> (Bighead carp)               | Pearl River Delta      | [172]  |
| 224 | <i>Siniperca kneri</i> (Mandarin fish)                   | Pearl River Delta      | [172]  |
| 225 | <i>Cyprinus carpio</i> (carp)                            | Chagan lake            | [143]  |
| 226 | <i>Hypophthalmichthys molitrix</i> (silver carp)         | Chagan lake            | [143]  |
| 227 | <i>Aristichthys nobilis</i> (bighead carp)               | Chagan lake            | [143]  |
| 228 | <i>Carassius auratus gubelio</i> (crucian)               | Chagan lake            | [143]  |
| 229 | <i>Megalobrama amblycephala</i> (bluntnose black bream)  | Chagan lake            | [143]  |
| 230 | <i>Parasilurus asotus</i> (catfish)                      | Chagan lake            | [143]  |
| 231 | <i>Percottus glehni</i> (perch sleeper)                  | Chagan lake            | [143]  |
| 232 | <i>Parasilurus asotus</i> (Catfish)                      | Chagan lake            | [143]  |
| 233 | Crucians                                                 | Sanjiang Plain         | [131]  |
| 234 | Amur sleepers                                            | Sanjiang Plain         | [131]  |
| 235 | Amur bitterlings                                         | Sanjiang Plain         | [131]  |
| 236 | Loaches.                                                 | Sanjiang Plain         | [131]  |
| 237 | <i>Ctenopharyngodon idella Valenciennes</i> (grass carp) | Wanshan                | [54]   |
| 238 | <i>Gymnocypris namensis</i>                              | Tibet                  | [180]  |
| 239 | <i>Gymnocypris scleracanthus</i>                         | Tibet                  | [180]  |
| 240 | <i>Gymnocypris waddelli</i>                              | Tibet                  | [180]  |
| 241 | <i>Oxygymnocypris stewartii</i>                          | Tibet                  | [180]  |
| 242 | <i>Pareuchiloglanis kamengensis</i>                      | Tibet                  | [180]  |
| 243 | <i>Pseudecheneis sulcatus</i>                            | Tibet                  | [180]  |
| 244 | <i>Ptychobarbus dipogon</i>                              | Tibet                  | [180]  |
| 245 | <i>Schizopygopsis younghusbandi</i>                      | Tibet                  | [180]  |
| 246 | <i>Schizothorax labiata</i>                              | Tibet                  | [180]  |
| 247 | <i>Schizothorax macropogon</i>                           | Tibet                  | [180]  |
| 248 | <i>Schizothorax o'connori</i>                            | Tibet                  | [180]  |
| 249 | <i>Schizothorax waltoni</i>                              | Tibet                  | [180]  |
| 250 | <i>Silurus asotus linnaeus</i>                           | Tibet                  | [180]  |
| 251 | Freshwater fish (Crucian carp)                           | Zhoushan               | [189]  |
| 252 | <i>Channa argus</i> (northern snakehead)                 | Pearl River Delta      | [170]  |
| 253 | <i>Siniperca chuatsi</i> (mandarin fish)                 | Pearl River Delta      | [170]  |
| 254 | <i>Lepomis macrochirus</i> (largemouth bass)             | Pearl River Delta      | [170]  |
| 255 | <i>Aristichthys nobilis</i> (big-head carp)              | Pearl River Delta      | [170]  |
| 256 | <i>Ctenopharyngodon idellus</i> (grass carp)             | Pearl River Delta      | [170]  |
| 257 | <i>Ctenopharyngodon idellus</i> (grass carps)            | Tingjiang river        | [191]  |
| 258 | <i>Aristichthys nobilis</i> (Bighead carp)               | Pearl River Delta      | [35]   |
| 259 | <i>Clarias fuscus</i> (Catfish)                          | Pearl River Delta      | [35]   |

| ID  | Name of fish species*                              | Location             | Source |
|-----|----------------------------------------------------|----------------------|--------|
| 260 | <i>Ctenopharyngodon idellus</i> (Grass carp)       | Pearl River Delta    | [35]   |
| 261 | <i>Mulgil cephalus</i> (Grey mullet)               | Pearl River Delta    | [35]   |
| 262 | <i>Siniperca kneri</i> (Mandarin fish)             | Pearl River Delta    | [35]   |
| 263 | <i>Cirrhina molitorella</i> (Mud carp)             | Pearl River Delta    | [35]   |
| 264 | <i>Monopterus albus</i> (Rice field eel)           | Pearl River Delta    | [35]   |
| 265 | <i>Channa asiatica</i> (Snakehead)                 | Pearl River Delta    | [35]   |
| 266 | <i>Channa maculate</i> (Spotted snakehead)         | Pearl River Delta    | [35]   |
| 267 | <i>Oreochromis mossambicus</i> (Tilapia)           | Pearl River Delta    | [35]   |
| 268 | <i>Coreius heterodon</i>                           | Yangtze River        | [87]   |
| 269 | <i>Pelteobagrus vachelli</i>                       | Yangtze River        | [87]   |
| 270 | <i>Hypophthalmichthys molitrix</i> (Silver carp)   | Ya'er lake           | [99]   |
| 271 | <i>Cyprinus carpio</i> (Common carp)               | Ya'er lake           | [99]   |
| 272 | <i>Carassius carassius</i> (Crucian carp)          | Ya'er lake           | [99]   |
| 273 | <i>Ophiocephalus argus cantor</i> (Snakehead fish) | Ya'er lake           | [99]   |
| 274 | <i>Carassius auratus</i> (Crucian carp)            | Wanshan              | [58]   |
| 275 | <i>Ctenopharyngodon idella</i> (and grass carp)    | Wanshan              | [58]   |
| 276 | <i>Gymnocypris przewalskii</i>                     | Tibet                | [179]  |
| 277 | <i>Carassius auratus</i>                           | Tibet                | [179]  |
| 278 | <i>Gymnocypris microcephalus</i>                   | Tibet                | [179]  |
| 279 | <i>Gymnocypris microcephalus</i>                   | Tibet                | [179]  |
| 280 | <i>Gymnocypris waddellii</i>                       | Tibet                | [179]  |
| 281 | <i>Racoma biddulphi</i> Gunther                    | Tibet                | [179]  |
| 282 | <i>Gymnocypris waddellii</i>                       | Tibet                | [179]  |
| 283 | <i>Racoma tibetanus</i>                            | Tibet                | [179]  |
| 284 | Tonguefish                                         | Huludao              | [7]    |
| 285 | Squill                                             | Huludao              | [7]    |
| 286 | Sleeve-fish                                        | Huludao              | [7]    |
| 287 | Goby                                               | Huludao              | [7]    |
| 288 | <i>Lampetra japonica</i>                           | Sedond Songhua river | [140]  |
| 289 | <i>Erythroculter ilishaeformis</i>                 | Sedond Songhua river | [140]  |
| 290 | <i>Erythroculter oxycephalus</i>                   | Sedond Songhua river | [140]  |
| 291 | <i>Erythroculter mongolicus</i>                    | Sedond Songhua river | [140]  |
| 292 | <i>Xenocypris macrolepis</i>                       | Sedond Songhua river | [140]  |
| 293 | <i>Cyprinus carpio</i>                             | Sedond Songhua river | [140]  |
| 294 | <i>Carassius auratus</i>                           | Sedond Songhua river | [140]  |
| 295 | <i>Aristichthys nobilis</i>                        | Sedond Songhua river | [140]  |
| 296 | <i>Parasilurus asotus</i>                          | Sedond Songhua river | [140]  |
| 297 | <i>Pseudobagrus fulvidraco</i>                     | Sedond Songhua river | [140]  |
| 298 | <i>Lota lota</i>                                   | Sedond Songhua river | [140]  |
| 299 | <i>Ophicephalus argus</i>                          | Sedond Songhua river | [140]  |
| 300 | <i>Hemiculter leucisculus</i>                      | Sedond Songhua river | [140]  |
| 301 | <i>Xenocypris macrolepis</i>                       | Sedond Songhua river | [140]  |
| 302 | <i>Cyprinus carpio</i>                             | Sedond Songhua river | [140]  |
| 303 | <i>Carassius auratus</i>                           | Sedond Songhua river | [140]  |

| ID  | Name of fish species*                                   | Location             | Source |
|-----|---------------------------------------------------------|----------------------|--------|
| 304 | <i>Hypophthalmichthys molitrix</i>                      | Sedond Songhua river | [140]  |
| 305 | <i>Parasilurus asvtus</i>                               | Sedond Songhua river | [140]  |
| 306 | <i>Anodonta woodiana woodiana</i>                       | Sedond Songhua river | [140]  |
| 307 | <i>Cristaria plicata</i>                                | Sedond Songhua river | [140]  |
| 308 | <i>Lanceolaria grayana</i>                              | Sedond Songhua river | [140]  |
| 309 | <i>Unio douglasiae</i>                                  | Sedond Songhua river | [140]  |
| 310 | <i>Hemiculter leucisculus</i>                           | Sedond Songhua river | [140]  |
| 311 | <i>Carassius auratus gibeliv</i>                        | Sedond Songhua river | [140]  |
| 312 | <i>Cyprinus carpio</i> Linnaeus,                        | Sedond Songhua river | [140]  |
| 313 | <i>Saurogobio dabryi</i>                                | Sedond Songhua river | [140]  |
| 314 | <i>Pseudaspius leptocephalus</i> (Flathead asp)         | Songhua river        | [141]  |
| 315 | <i>Parasilurus asotus</i> (Catfish)                     | Songhua river        | [141]  |
| 316 | <i>Camallanus cotti</i> (Chinese hooksnout carp)        | Songhua river        | [141]  |
| 317 | <i>Carassius carassius</i> (Crucian carp)               | Songhua river        | [141]  |
| 318 | <i>Pseudorasbora parva</i> (Topmouth gudgeon)           | Songhua river        | [141]  |
| 319 | <i>Abbottina rivularis</i> (Chinese false gudgeon)      | Songhua river        | [141]  |
| 320 | <i>Leuciscus waleckii</i> (Amur ide)                    | Songhua river        | [141]  |
| 321 | <i>Ladislavia taczanowskii</i> (Tachanovsky's gudgeon)  | Songhua river        | [141]  |
| 322 | <i>Misgurnus anguillicaudatus</i> (Loach)               | Songhua river        | [141]  |
| 323 | <i>Aristichthys nobilis</i> (Bighead carp)              | Songhua river        | [141]  |
| 324 | <i>Hypophthalmichthys molitrix</i> (Silver carp)        | Songhua river        | [141]  |
| 325 | <i>Hypophthalmichthys molitrix</i> (silver carp)        | Chinese markets      | [201]  |
| 326 | <i>Ctenopharyngodon idellus</i> (grass carp)            | Chinese markets      | [201]  |
| 327 | <i>Megalobrama amblycephala</i> (bluntnose black bream) | Chinese markets      | [201]  |
| 328 | <i>Cyprinus carpio</i> (common carp)                    | Chinese markets      | [201]  |
| 329 | <i>Carassius auratus</i> (crucian carp)                 | Chinese markets      | [201]  |
| 330 | <i>Oreochromis niloticus</i> (tilapia )                 | Chinese markets      | [201]  |
| 331 | <i>Mugil soiuy</i> (barracuda)                          | Chinese markets      | [201]  |
| 332 | <i>Siniperca chuatsi</i> (Chinese perch)                | Chinese markets      | [201]  |
| 333 | <i>Micro-pterus salmoides</i> (black bass)              | Chinese markets      | [201]  |
| 334 | <i>Channa argus</i> (snakehead fish)                    | Chinese markets      | [201]  |
| 335 | <i>Pelteobagrus fulvidraco</i> (yellow catfish)         | Chinese markets      | [201]  |
| 336 | <i>Monopterus albus</i> (ricefield eel)                 | Chinese markets      | [201]  |
| 337 | <i>Leiocassis crassilabris</i> Günther                  | Wujjiang river       | [62]   |
| 338 | <i>Mystus macropterus</i>                               | Wujjiang river       | [62]   |
| 339 | <i>Opsariichthys bidens</i>                             | Wujjiang river       | [62]   |
| 340 | <i>Zacco platypus</i>                                   | Wujjiang river       | [62]   |
| 341 | Cyprinidae                                              | Wujjiang river       | [62]   |
| 342 | <i>Hemiculter leucisculus</i>                           | Wujjiang river       | [62]   |
| 343 | <i>Tor brevifilis</i>                                   | Wujjiang river       | [62]   |
| 344 | <i>Squalidus argentatus</i>                             | Wujjiang river       | [62]   |
| 345 | <i>Glyptothorax sinensis</i> Regan                      | Wujjiang river       | [62]   |
| 346 | <i>Hemiculterella sauvagei</i>                          | Wujjiang river       | [62]   |
| 347 | <i>Hemibarbus maculatus</i>                             | Wujjiang river       | [62]   |

| ID  | Name of fish species*                                      | Location          | Source |
|-----|------------------------------------------------------------|-------------------|--------|
| 348 | <i>Spinibarbus sinensis</i>                                | Wujjiang river    | [62]   |
| 349 | <i>Carassius auratus</i>                                   | Wujjiang river    | [62]   |
| 350 | <i>Garra pingi pingi</i>                                   | Wujjiang river    | [62]   |
| 351 | <i>Botia superciliaris</i> Günther                         | Wujjiang river    | [62]   |
| 352 | <i>Pseudogyrincheilus</i>                                  | Wujjiang river    | [62]   |
| 353 | <i>procheilus</i>                                          | Wujjiang river    | [62]   |
| 354 | <i>Lepturichthys fimbriata</i> Günther                     | Wujjiang river    | [62]   |
| 355 | <i>Jinshaia sinensis</i>                                   | Wujjiang river    | [62]   |
| 356 | <i>Hypophthalmichthys molitrix</i> (comprised silver carp) | Baihua reservoir  | [53]   |
| 357 | <i>Aristichthys novilis</i> (big-head carp)                | Baihua reservoir  | [53]   |
| 358 | <i>Cyprinus carpio</i> (common carp)                       | Baihua reservoir  | [53]   |
| 359 | <i>Ctenopharyngodon idellus</i> (grass carp)               | Baihua reservoir  | [53]   |
| 360 | <i>Carassius auratus</i> (silver crucian carp)             | Baihua reservoir  | [53]   |
| 361 | <i>Parasilurus asotus</i>                                  | Guizhou           | [71]   |
| 362 | <i>Opsariichthys bidens</i>                                | Guizhou           | [71]   |
| 363 | <i>Erythroculter ilishaeformis</i>                         | Guizhou           | [71]   |
| 364 | <i>Micropterus salmonides</i>                              | Guizhou           | [71]   |
| 365 | <i>Cyprinus carpio</i>                                     | Guizhou           | [71]   |
| 366 | <i>Carassius carassius</i>                                 | Guizhou           | [71]   |
| 367 | <i>Hemiculter bleekeri bleekeri</i>                        | Guizhou           | [71]   |
| 368 | <i>Oreochromis mossambicus</i>                             | Guizhou           | [71]   |
| 369 | <i>Aristichthys nobilis</i>                                | Guizhou           | [71]   |
| 370 | <i>Hypophthalmichthys molitrix</i>                         | Guizhou           | [71]   |
| 371 | <i>Megalobrama amblycephala</i>                            | Guizhou           | [71]   |
| 372 | <i>Ctenopharyngodon idellus</i>                            | Guizhou           | [71]   |
| 373 | <i>Carassius auratus gibelio</i> Bloch 1783                | Baihua & Hongfeng | [71]   |
| 374 | <i>Ctenopharyngodon idella</i> Valenciennes 1844           | Baihua & Hongfeng | [71]   |
| 375 | <i>Cyprinus carpio haematopterus</i> Linnaeus 1758         | Baihua & Hongfeng | [71]   |
| 376 | <i>Ctenopharyngodon idellus</i> (grass carp)               | Shanghai markets  | [153]  |
| 377 | <i>Megalobrama amblycephala</i> (Wuchang fish)             | Shanghai markets  | [153]  |
| 378 | <i>Carassius aumtus</i> (crucian carp)                     | Shanghai markets  | [153]  |
| 379 | <i>Aristichthys nobilis</i> (bighead carp)                 | Shanghai markets  | [153]  |
| 380 | <i>Channa argus</i> (northern snakehead)                   | Shanghai markets  | [153]  |
| 381 | <i>Siniperca chuatsi</i> (mandarin fish)                   | Shanghai markets  | [153]  |
| 382 | <i>Micropterus salmoides</i> (largemouth bass)             | Shanghai markets  | [153]  |
| 383 | <i>C. idellus</i>                                          | Taihu lake        | [153]  |
| 384 | <i>M. amblycephala</i>                                     | Taihu lake        | [153]  |
| 385 | <i>P. pekinensis</i>                                       | Taihu lake        | [153]  |
| 386 | <i>C. carassius</i>                                        | Taihu lake        | [153]  |
| 387 | <i>C. carpio</i>                                           | Taihu lake        | [153]  |
| 388 | <i>H. molitrix</i>                                         | Taihu lake        | [153]  |
| 389 | <i>H. leucisculus</i>                                      | Taihu lake        | [153]  |
| 390 | <i>A. macropterus</i>                                      | Taihu lake        | [153]  |
| 391 | <i>H. nobilis</i>                                          | Taihu lake        | [153]  |

| ID                        | Name of fish species*                                | Location   | Source |
|---------------------------|------------------------------------------------------|------------|--------|
| 392                       | <i>S. dabryi</i>                                     | Taihu lake | [153]  |
| 393                       | <i>H. intermedius</i>                                | Taihu lake | [153]  |
| 394                       | <i>P. fulvidraco</i>                                 | Taihu lake | [153]  |
| 395                       | <i>T. swinhonis</i>                                  | Taihu lake | [153]  |
| 396                       | <i>C. taihuensis</i>                                 | Taihu lake | [153]  |
| 397                       | <i>H. maculates</i>                                  | Taihu lake | [153]  |
| 398                       | <i>C. erythropterus</i>                              | Taihu lake | [153]  |
| 399                       | <i>C. alburnus</i>                                   | Taihu lake | [153]  |
| 400                       | <i>P. hyalocranius</i>                               | Taihu lake | [153]  |
| 401                       | <i>N. taihuensis</i> Chen                            | Taihu lake | [153]  |
| 402                       | <i>C. mongolicus</i>                                 | Taihu lake | [153]  |
| 403                       | <i>C. dabryi</i>                                     | Taihu lake | [153]  |
| 404                       | <i>P. guichenoti</i>                                 | Taihu lake | [153]  |
| 405                       | <i>S. asotus</i>                                     | Taihu lake | [153]  |
| 406                       | <i>A. rhombeus</i>                                   | Taihu lake | [153]  |
| 407                       | <i>Cyprinus carpio</i> (common carp)                 | Beijing    | [162]  |
| 408                       | <i>Carassius auratus</i> (crucian carp)              | Beijing    | [162]  |
| 409                       | <i>Silurus meridionalis</i> (leather catfish)        | Beijing    | [162]  |
| 410                       | <i>Tilapia nilotica</i> (java tilapia)               | Beijing    | [162]  |
| 411                       | <i>Chinemys reevesii</i> (Chinese softshell turtle)  | Beijing    | [162]  |
| <b><i>Marine fish</i></b> |                                                      |            |        |
| 412                       | Pompano farmed marine fish                           | Daya Bay   | [196]  |
| 413                       | Snapper farmed marine fish                           | Daya Bay   | [196]  |
| 414                       | <i>Pampus argenteus</i>                              | Zhejiang   | [27]   |
| 415                       | <i>Periophthalmus sericus</i>                        | Zhejiang   | [27]   |
| 416                       | <i>Coilia mystus</i>                                 | Zhejiang   | [27]   |
| 417                       | <i>Harpodon nehereus</i>                             | Zhejiang   | [27]   |
| 418                       | <i>Collichthys lucidus</i>                           | Zhejiang   | [27]   |
| 419                       | <i>Cynoglossus joyneri</i>                           | Zhejiang   | [27]   |
| 420                       | <i>Mugil cephalus</i>                                | Zhejiang   | [27]   |
| 421                       | <i>Pampus argenteus</i> (Pomfret)                    | Zhejiang   | [16]   |
| 422                       | <i>Trichiurus japonicus</i> (Hairtail)               | Zhejiang   | [16]   |
| 423                       | <i>Pseudosciaena crocea</i> (Large yellow croaker)   | Zhejiang   | [16]   |
| 424                       | <i>Miichthys miiuy</i> (Brown croaker)               | Zhejiang   | [16]   |
| 425                       | <i>Larimichthys polyactis</i> (Small yellow croaker) | Zhejiang   | [16]   |
| 426                       | <i>Lateolabrax japonicus</i> (Japanese seabass)      | Zhejiang   | [16]   |
| 427                       | Swordfish                                            | Taiwan     | [186]  |
| 428                       | Shark                                                | Taiwan     | [186]  |
| 429                       | Red porgy                                            | Taiwan     | [186]  |
| 430                       | Tuna                                                 | Taiwan     | [186]  |
| 431                       | <i>Tilapia</i>                                       | Taiwan     | [186]  |
| 432                       | Cod                                                  | Taiwan     | [186]  |
| 433                       | Greater amberjack                                    | Taiwan     | [186]  |
| 434                       | Korean mackerels                                     | Taiwan     | [186]  |

| ID  | Name of fish species*    | Location            | Source |
|-----|--------------------------|---------------------|--------|
| 435 | Salmon                   | Taiwan              | [186]  |
| 436 | Narrow barred spanish    | Taiwan              | [186]  |
| 437 | Mackerels                | Taiwan              | [186]  |
| 438 | Hairtail                 | Taiwan              | [186]  |
| 439 | Threadfin                | Taiwan              | [186]  |
| 440 | Milkfish                 | Taiwan              | [186]  |
| 441 | Ocean sunfish            | Taiwan              | [186]  |
| 442 | Nematalosa come          | Pearl River Estuary | [34]   |
| 443 | Cynoglossus puncticeps   | Pearl River Estuary | [34]   |
| 444 | Cynoglossus arel         | Pearl River Estuary | [34]   |
| 445 | Leiognathus brevirostris | Pearl River Estuary | [34]   |
| 446 | Liza macrolepis          | Pearl River Estuary | [34]   |
| 447 | Mugil cephalus           | Pearl River Estuary | [34]   |
| 448 | Valamugil formosae       | Pearl River Estuary | [34]   |
| 449 | Platycephalus indicus    | Pearl River Estuary | [34]   |
| 450 | Plotosus lineatus        | Pearl River Estuary | [34]   |
| 451 | Johnius belangerii       | Pearl River Estuary | [34]   |
| 452 | Dendrophysa russelii     | Pearl River Estuary | [34]   |
| 453 | Pennahia anea            | Pearl River Estuary | [34]   |
| 454 | Nibea albiflora          | Pearl River Estuary | [34]   |
| 455 | Epinephelus awoara       | Pearl River Estuary | [34]   |
| 456 | Epinephelus bruneus      | Pearl River Estuary | [34]   |
| 457 | Siganus fuscescens       | Pearl River Estuary | [34]   |
| 458 | Pampus argenteus         | Pearl River Estuary | [34]   |
| 459 | Inimicus japonicus       | Pearl River Estuary | [34]   |
| 460 | Apogon semilineatus      | Dapeng Bay.         | [34]   |
| 461 | Repomucenus curvicornis  | Dapeng Bay.         | [34]   |
| 462 | Alepes melanoptera       | Dapeng Bay.         | [34]   |
| 463 | Trachurus japonicus      | Dapeng Bay.         | [34]   |
| 464 | Carangoides equula       | Dapeng Bay.         | [34]   |
| 465 | Psenopsis anomala        | Dapeng Bay.         | [34]   |
| 466 | Sardinella jussieu       | Dapeng Bay.         | [34]   |
| 467 | sardinella lemuru        | Dapeng Bay.         | [34]   |
| 468 | Nematalosa come          | Dapeng Bay.         | [34]   |
| 469 | cynoglossus arel         | Dapeng Bay.         | [34]   |
| 470 | Gerresfilamentosus       | Dapeng Bay.         | [34]   |
| 471 | Gerres macrosoma         | Dapeng Bay.         | [34]   |
| 472 | Leiognathus brevirostris | Dapeng Bay.         | [34]   |
| 473 | Photopectoralis bindus   | Dapeng Bay.         | [34]   |
| 474 | Lutjanus russellii       | Dapeng Bay.         | [34]   |
| 475 | Valamugil formosae       | Dapeng Bay.         | [34]   |
| 476 | Valamugil sahelii        | Dapeng Bay.         | [34]   |
| 477 | Liza macrolepis          | Dapeng Bay.         | [34]   |
| 478 | Nemipterus japonicus     | Dapeng Bay.         | [34]   |

| ID  | Name of fish species*                                            | Location    | Source |
|-----|------------------------------------------------------------------|-------------|--------|
| 479 | <i>Inegocia japonica</i>                                         | Dapeng Bay. | [34]   |
| 480 | <i>Platycephalus indicus</i>                                     | Dapeng Bay. | [34]   |
| 481 | <i>Eleutheronema tetradactylum</i>                               | Dapeng Bay. | [34]   |
| 482 | <i>Pennahia argentata</i>                                        | Dapeng Bay. | [34]   |
| 483 | <i>Chrysochir aureus</i>                                         | Dapeng Bay. | [34]   |
| 484 | <i>Johnius carutta</i>                                           | Dapeng Bay. | [34]   |
| 485 | <i>Johnius macrorhynchus</i>                                     | Dapeng Bay. | [34]   |
| 486 | <i>Pseudosciaena crocea</i>                                      | Dapeng Bay. | [34]   |
| 487 | <i>Argyrosomus japonicus</i>                                     | Dapeng Bay. | [34]   |
| 488 | <i>Nibea albiflora</i>                                           | Dapeng Bay. | [34]   |
| 489 | <i>Nibea soldado</i>                                             | Dapeng Bay. | [34]   |
| 490 | <i>Sebastiscus marmoratus</i>                                    | Dapeng Bay. | [34]   |
| 491 | <i>Epinephelus awoara</i>                                        | Dapeng Bay. | [34]   |
| 492 | <i>Epinephelus fasciatomaculosus</i>                             | Dapeng Bay. | [34]   |
| 493 | <i>Siganus fuscescens</i>                                        | Dapeng Bay. | [34]   |
| 494 | <i>Siganus canaliculatus</i>                                     | Dapeng Bay. | [34]   |
| 495 | <i>Sillago sihama</i>                                            | Dapeng Bay. | [34]   |
| 496 | <i>Evynnis cardinalis</i>                                        | Dapeng Bay. | [34]   |
| 497 | <i>Sphyræna pinguis</i>                                          | Dapeng Bay. | [34]   |
| 498 | <i>Saurida elongata</i>                                          | Dapeng Bay. | [34]   |
| 499 | <i>Harpadon nehereus</i>                                         | Dapeng Bay. | [34]   |
| 500 | <i>Terapon jarbua</i>                                            | Dapeng Bay. | [34]   |
| 501 | <i>Terapon theraps</i>                                           | Dapeng Bay. | [34]   |
| 502 | <i>Apogon doederleini</i>                                        | Dapeng Bay. | [34]   |
| 503 | <i>Rhynchopelates oxyrhynchus</i>                                | Dapeng Bay. | [34]   |
| 504 | <i>Lagocephalus gloveri</i>                                      | Dapeng Bay. | [34]   |
| 505 | <i>Acanthopagrus australis</i> (Black bream, surf bream)         | Hongkong    | [176]  |
| 506 | <i>Acanthopagrus latus</i> (Yellowfin seabream)                  | Hongkong    | [176]  |
| 507 | <i>Canthopagrus schlegeli</i> (black porgy, blackhead seabream)  | Hongkong    | [176]  |
| 508 | <i>Anguilla japonica</i> (japanese eel)                          | Hongkong    | [176]  |
| 509 | <i>Ariomma indica</i> (Indian ariomma, Indian driftfish)         | Hongkong    | [176]  |
| 510 | <i>Aristichthys nobilis</i> (bighead carp)                       | Hongkong    | [176]  |
| 511 | <i>Beryx splendens</i> (Splendid alfonsino)                      | Hongkong    | [176]  |
| 512 | <i>Branchiostegus albus</i> (White horsehead)                    | Hongkong    | [176]  |
| 513 | <i>Cephalopholis urodeta</i> (Darkfin hind)                      | Hongkong    | [176]  |
| 514 | <i>Channa maculate</i> (Snakehead, blotched snakehead)           | Hongkong    | [176]  |
| 515 | <i>Choerodon schoenleinii</i> (Green wrasse, blackspot tuskfish) | Hongkong    | [176]  |
| 516 | <i>Cirrhinus molitorella</i> (mud carp)                          | Hongkong    | [176]  |
| 517 | <i>Clarias fuscus</i> (Catfish, Hong Kong catfish)               | Hongkong    | [176]  |
| 518 | <i>Cololabis saira</i> (Pacific saury)                           | Hongkong    | [176]  |
| 519 | <i>Cromileptes altivelis</i> (Humpback grouper)                  | Hongkong    | [176]  |
| 520 | <i>Ctenopharyngodon idellus</i> (Grass carp)                     | Hongkong    | [176]  |
| 521 | <i>Cynoglossus arel</i> (Largescale tonguesole, tonguefish)      | Hongkong    | [176]  |
| 522 | <i>Cynoglossus bilineatus</i> (Fourlined tonguesole)             | Hongkong    | [176]  |



| ID  | Name of fish species*                                                                | Location | Source |
|-----|--------------------------------------------------------------------------------------|----------|--------|
| 523 | <i>Dentex tumifrons</i> (Golden tail, tellowback seabream)                           | Hongkong | [176]  |
| 524 | <i>Eleutheronema tetradactylum</i> (Fourfinger threadfin, blind tasselfish)          | Hongkong | [176]  |
| 525 | <i>Epinephelus areolatus</i> (Areolate grouper, green-spotted rock cod)              | Hongkong | [176]  |
| 526 | <i>Epinephelus awoara</i> (Yellow grouper, banded grouper)                           | Hongkong | [176]  |
| 527 | <i>Epinephelus bleekeri</i> (Duskytail grouper)                                      | Hongkong | [176]  |
| 528 | <i>Epinephelus coioides</i> (Green grouper, orange-spotted grouper, estuary grouper) | Hongkong | [176]  |
| 529 | <i>Epinephelus fasciatus</i> (Rock grouper, banded reef-cod)                         | Hongkong | [176]  |
| 530 | <i>Epinephelus hexagonatus</i> (Starspotted grouper)                                 | Hongkong | [176]  |
| 531 | <i>Epinephelus lanceolatus</i> (Giant grouper)                                       | Hongkong | [176]  |
| 532 | <i>Epinephelus merra</i> (Honeycomb grouper)                                         | Hongkong | [176]  |
| 533 | <i>Epinephelus quoyanus</i> (Longfin grouper)                                        | Hongkong | [176]  |
| 534 | <i>Epinephelus trimaculatus</i> (Threespot grouper)                                  | Hongkong | [176]  |
| 535 | <i>Gymnothorax favagineus</i> (Laced moray)                                          | Hongkong | [176]  |
| 536 | <i>Gymnothorax reevesii</i> (Reeve's moray)                                          | Hongkong | [176]  |
| 537 | <i>Haplochromis nitens</i> (Skewband grunt, Grunt)                                   | Hongkong | [176]  |
| 538 | <i>Harpodon nehereus</i> (Bombay duck)                                               | Hongkong | [176]  |
| 539 | <i>Katsuwonus pelamis</i> (Skipjack tuna)                                            | Hongkong | [176]  |
| 540 | <i>Larimichthys croceus</i> (Yellow croaker, croceine croaker, large yellow croaker) | Hongkong | [176]  |
| 541 | <i>Lateolabrax japonicus</i> (Japanese seaperch, common sea bass, Japanese seabass)  | Hongkong | [176]  |
| 542 | <i>Lates calcarifer</i> (Barramundi)                                                 | Hongkong | [176]  |
| 543 | <i>Lethrinus obsoletus</i> (Orange-striped emperor)                                  | Hongkong | [176]  |
| 544 | <i>Lutjanus argentimaculatus</i> (Mangrove red snapper)                              | Hongkong | [176]  |
| 545 | <i>Lutjanus malabaricus</i> (Red snapper, Malabar blood snapper)                     | Hongkong | [176]  |
| 546 | <i>lutjanus russelli</i> (ussell's snapper, fingermark bream)                        | Hongkong | [176]  |
| 547 | <i>Lutjanus stellatus</i> (Star snapper)                                             | Hongkong | [176]  |
| 548 | <i>Megalobrama terminalis</i> (Black amur bream)                                     | Hongkong | [176]  |
| 549 | <i>Micropterus salmoides</i> (arge mouth bass, largemouth black bass)                | Hongkong | [176]  |
| 550 | <i>Mugil cephalus</i> (Grey mullet, flathead grey mullet)                            | Hongkong | [176]  |
| 551 | <i>Mulloidichthys flavolineatus</i> (Yellowstripe goatfish)                          | Hongkong | [176]  |
| 552 | <i>Nemipterus japonicus</i> (japanese golden thread, Japanese threadfin bream)       | Hongkong | [176]  |
| 553 | <i>Nemipterus virgatus</i> (Golden threadfin bream, golden)                          | Hongkong | [176]  |
| 554 | <i>Oreochromis niloticus niloticus</i> (Tilapia, Nile tilapia)                       | Hongkong | [176]  |
| 555 | <i>Pagrus major</i> (Red pargo, Japanese seabream, red seabream)                     | Hongkong | [176]  |
| 556 | <i>Pampus argenteus</i> (Silver pomfret, butterfish, pomfret)                        | Hongkong | [176]  |
| 557 | <i>Pampus nozawae</i> (Swallow tail pomfret)                                         | Hongkong | [176]  |
| 558 | <i>Paralichthys olivaceus</i> (False halibut, bastard halibut)                       | Hongkong | [176]  |
| 559 | <i>Parupeneus barberinus</i> (Dash-and-dot goatfish)                                 | Hongkong | [176]  |
| 560 | <i>Parupeneus indicus</i> (Indian goatfish)                                          | Hongkong | [176]  |
| 561 | <i>Pennahia argentata</i> (White croaker, white Chinese croaker, silver croaker)     | Hongkong | [176]  |
| 562 | <i>Platycephalus indicus</i> (Flathead, bartail flathead)                            | Hongkong | [176]  |
| 563 | <i>Platycephalus spp</i> (Flathead)                                                  | Hongkong | [176]  |
| 564 | <i>Plectorhinchus cinctus</i> (Crescent sweetlips, grunt)                            | Hongkong | [176]  |
| 565 | <i>Plectropomus areolatus</i> (Squaretail coralgroup)                                | Hongkong | [176]  |
| 566 | <i>Plectropomus leopardus</i> (Leopard coralgroup)                                   | Hongkong | [176]  |

| ID  | Name of fish species*                                                                                                   | Location | Source |
|-----|-------------------------------------------------------------------------------------------------------------------------|----------|--------|
| 567 | <i>Pomadasys kaakan</i> (Javelin grunter)                                                                               | Hongkong | [176]  |
| 568 | <i>Priacanthus tayenus</i> (urple-spotted bigeye, bigeye perch)                                                         | Hongkong | [176]  |
| 569 | <i>Priacanthus macracanthus</i> (red bigeye, bulls-eye perch)                                                           | Hongkong | [176]  |
| 570 | <i>Psenopsis anomala</i> (butter fish, Pacific rudderfish)                                                              | Hongkong | [176]  |
| 571 | <i>Pseudocaranx dentex</i> (White trevally)                                                                             | Hongkong | [176]  |
| 572 | <i>Rachycentron canadum</i> (Black bonito, cobia)                                                                       | Hongkong | [176]  |
| 573 | <i>Salmo Salar</i> (Atlantic salmon)                                                                                    | Hongkong | [176]  |
| 574 | <i>Sarda orientalis</i> (Striped bonito)                                                                                | Hongkong | [176]  |
| 575 | <i>Sardinops sagax</i> (outh American pilchard)                                                                         | Hongkong | [176]  |
| 576 | <i>Saurida elongate</i> (Slender lizardfish)                                                                            | Hongkong | [176]  |
| 577 | <i>Saurida tumbil</i> (Greater lizardfish)                                                                              | Hongkong | [176]  |
| 578 | <i>Scatophagus argus</i> (Spotted scat, butter fish, spade fish)                                                        | Hongkong | [176]  |
| 579 | <i>Scomber japonicus</i> (Chub mackerel)                                                                                | Hongkong | [176]  |
| 580 | <i>Scomberomorus commerson</i> (Narrow-barred Spanish mackerel, albacore, banded tuna)                                  | Hongkong | [176]  |
| 581 | <i>Scomberomorus guttatus</i> (Indo-pacific king mackerel)                                                              | Hongkong | [176]  |
| 582 | <i>Sebastes marmoratus</i> (Rockfish)                                                                                   | Hongkong | [176]  |
| 583 | <i>Seriola dumerili</i> (Purple amberjack, greater amberjack)                                                           | Hongkong | [176]  |
| 584 | <i>Seriola lalandi</i> (Yellowtail kingfish, yellowtail amberjack)                                                      | Hongkong | [176]  |
| 585 | <i>Siganus canaliculatus</i> (Rabbitfish, pearl-spotted spinefoot, white-spotted spinefoot)                             | Hongkong | [176]  |
| 586 | <i>Sillago japonica</i> (Japanese sillago)                                                                              | Hongkong | [176]  |
| 587 | <i>Siniperca chuatsi</i> (Freshwater grouper, Mandarin fish)                                                            | Hongkong | [176]  |
| 588 | <i>Sphyaena flavicauda</i> (Yellowtail barracuda, barracudas)                                                           | Hongkong | [176]  |
| 589 | <i>Trachinotus blochii</i> (Snubnose pompano)                                                                           | Hongkong | [176]  |
| 590 | <i>Trachurus japonicus</i> (Japanese jack mackerel, Atlantic horse mackerel)                                            | Hongkong | [176]  |
| 591 | <i>Trichiurus lepturus</i> (argehead hairtail, hairtail)                                                                | Hongkong | [176]  |
| 592 | <i>Trichiurus nanhaiensis</i> (Largehead hairtail, South China Sea hairtail)                                            | Hongkong | [176]  |
| 593 | <i>Variola albimarginata</i> (White-edged lyretail , Canned albacore tuna, Canned skipjack tuna, Canned yellowfin tuna) | Hongkong | [176]  |
| 594 | <i>Cheilinus undulates</i> (Napolean wrasse)                                                                            | Hongkong | [177]  |
| 595 | <i>Epinephelus coioides</i> (Orange-spotted Grouper)                                                                    | Hongkong | [177]  |
| 596 | <i>Epinephelus Akaara</i> (red grouper)                                                                                 | Hongkong | [177]  |
| 597 | <i>Heteromycteris matsubarai</i> (Macau sole)                                                                           | Hongkong | [177]  |
| 598 | <i>Mylio macrocephalus</i> (Black sea bream)                                                                            | Hongkong | [177]  |
| 599 | <i>Mylio Zatus</i> (formerlySparu.r Zatus) (Yellow fin sea bream)                                                       | Hongkong | [177]  |
| 600 | <i>Nemipterus virgatus</i> (Golden thread)                                                                              | Hongkong | [177]  |
| 601 | <i>Platycephalus indicus</i> (Flat head)                                                                                | Hongkong | [177]  |
| 602 | <i>Siganus canaliculatus</i> (Rabbit fish)                                                                              | Hongkong | [177]  |
| 603 | <i>Stromateoides argenteus</i> (White pomfret)                                                                          | Hongkong | [177]  |
| 604 | <i>Trichiurus haumela</i> (Hair tail)                                                                                   | Hongkong | [177]  |
| 605 | <i>Avonoglossus tenuis</i> (Flattish)                                                                                   | Hongkong | [177]  |
| 606 | <i>Plutycephalus indicus</i> (Flathead)                                                                                 | Hongkong | [177]  |
| 607 | <i>Cynoglossus melapterus</i> (Tougue fish)                                                                             | Hongkong | [177]  |

| ID  | Name of fish species*                                   | Location                 | Source |
|-----|---------------------------------------------------------|--------------------------|--------|
| 608 | <i>Saurida tumbil</i> (Lizard fish)                     | Hongkong                 | [177]  |
| 609 | <i>Argyrosomonus argentatus</i> (White Chinese Croaker) | Hongkong                 | [177]  |
| 610 | <i>Cynoglossus melapterus</i> (Tongue fish)             | Hongkong                 | [177]  |
| 611 | <i>Saurida elongata</i> (Lizard fish)                   | Hongkong                 | [177]  |
| 612 | <i>Platycephalus indicus</i> (Flat head)                | Hongkong                 | [177]  |
| 613 | <i>Centropristis striata</i> (Bass, Black Sea)          | China                    | [199]  |
| 614 | <i>Tautoga onitis</i> (Blackfish (Tautog))              | China                    | [199]  |
| 615 | <i>Pseudosciaena polyactis</i> (Croaker, Yellow)        | China                    | [199]  |
| 616 | <i>Tentoriceps</i> sp. (Cutlass (Beltfish))             | China                    | [199]  |
| 617 | <i>Trichiurus</i> sp. (Cutlass (Beltfish))              | China                    | [199]  |
| 618 | <i>Lepturacanthus</i> sp. (Cutlass (Beltfish))          | China                    | [199]  |
| 619 | <i>Anguilla japonica</i> (Eel, Canned)                  | China                    | [199]  |
| 620 | <i>Errex zachirus</i>                                   | China                    | [199]  |
| 621 | <i>Microstomus pacificus</i>                            | China                    | [199]  |
| 622 | <i>Glyptocephalus cynoglossus</i>                       | China                    | [199]  |
| 623 | <i>Paralichthys dentatus</i>                            | China                    | [199]  |
| 624 | <i>Pseudopleuronectes americanus</i>                    | China                    | [199]  |
| 625 | <i>Scopthalmus aquosus</i>                              | China                    | [199]  |
| 626 | <i>Hippoglossoides platessoides</i>                     | China                    | [199]  |
| 627 | <i>Scomberomerus maculates</i>                          | China                    | [199]  |
| 628 | <i>Trachinotus blochi</i>                               | China                    | [199]  |
| 629 | <i>Pampus</i> spp.                                      | China                    | [199]  |
| 630 | <i>Peprilus alepidotus</i>                              | China                    | [199]  |
| 631 | <i>Stenotomus chrysops</i>                              | China                    | [199]  |
| 632 | <i>Pagrus pagrus</i>                                    | China                    | [199]  |
| 633 | <i>Lutjanus campechanus</i>                             | China                    | [199]  |
| 634 | <i>Rhomboplites aurorubens</i>                          | China                    | [199]  |
| 635 | <i>Lopholatilus chamaeleonticeps</i>                    | China                    | [199]  |
| 636 | <i>P. major</i> (Red seabream)                          | Fujian coastal lines     | [194]  |
| 637 | <i>S. ocellatus</i> (red drum)                          | Fujian coastal lines     | [194]  |
| 638 | <i>A Schlegelii</i> (black seabream)                    | Fujian coastal lines     | [194]  |
| 639 | <i>L. japonicus</i> (Japanese seabass)                  | Fujian coastal lines     | [194]  |
| 640 | <i>Siganus fuscens</i> (rabbitfish)                     | Fujian coastal lines     | [194]  |
| 641 | <i>Carassius carassius</i> (Crucian carp)               | Bohai and<br>Yellow Seas | [145]  |
| 642 | <i>Tilapia</i>                                          | Guangdong                | [46]   |
| 643 | <i>Ctenopharyngodon idellus</i>                         | Guangdong                | [46]   |
| 644 | <i>Aristichthys nobilis</i>                             | Guangdong                | [46]   |
| 645 | <i>Megalobrama amblycephala</i>                         | Guangdong                | [46]   |
| 646 | <i>Micropterus salmoides</i> <i>Siniperca chuatsi</i>   | Guangdong                | [46]   |
| 647 | <i>Ophicephalus argus</i>                               | Guangdong                | [46]   |
| 648 | <i>Sciaenops ocellatus</i>                              | Guangdong                | [46]   |
| 649 | <i>Trachinotus blochii</i>                              | Guangdong                | [46]   |
| 650 | <i>Lutjanus erythropterus</i>                           | Guangdong                | [46]   |

| ID  | Name of fish species*                                 | Location             | Source |
|-----|-------------------------------------------------------|----------------------|--------|
| 651 | <i>Trichiurus lepturus</i>                            | Guangdong            | [46]   |
| 652 | <i>Nemipterus virgatus</i>                            | Guangdong            | [46]   |
| 653 | <i>Mugil cephalus</i>                                 | Guangdong            | [46]   |
| 654 | <i>Navodon septentrionalis</i> (Drab filefish)        | Zhoushan             | [189]  |
| 655 | <i>Cynoglossus robustus</i> (Cinnamon flounder)       | Zhoushan             | [189]  |
| 656 | <i>Muraenesox cinereus</i> (Conger pike)              | Zhoushan             | [189]  |
| 657 | Silvery pomfret ( <i>Pampus argenteus</i> )           | Zhoushan             | [189]  |
| 658 | <i>Argyrosomus argentatus</i> (White mouth croaker)   | Zhoushan             | [189]  |
| 659 | <i>Pseudosciaena polyactis</i> (Small yellow croaker) | Zhoushan             | [189]  |
| 660 | <i>Arius thalassinus</i> (Giant seacatfish)           | Zhoushan             | [189]  |
| 661 | <i>Trichiurus haumela</i> (Ribbonfish)                | Zhoushan             | [189]  |
| 662 | <i>Harpodon nehereus</i> (Bombay duck)                | Zhoushan             | [189]  |
| 663 | <i>Platycephalus indicus</i> (Bartail flathead)       | Pearl River Delta    | [35]   |
| 664 | <i>Priacanthus macracanthus</i> (Bigeye)              | Pearl River Delta    | [35]   |
| 665 | <i>Epinephelus bleekeri</i> (Bleeker's grouper)       | Pearl River Delta    | [35]   |
| 666 | <i>Siganus punctatus</i> (Goldspotted rabbitfish)     | Pearl River Delta    | [35]   |
| 667 | <i>Nemipterus virgatus</i> (Golden threadfin bream)   | Pearl River Delta    | [35]   |
| 668 | <i>Epinephelus coioides</i> (Orange-spotted grouper)  | Pearl River Delta    | [35]   |
| 669 | <i>Trachinotus blochii</i> (Snubnose pompano)         | Pearl River Delta    | [35]   |
| 670 | <i>Cynoglossus robustus</i> (Tongue sole)             | Pearl River Delta    | [35]   |
| 671 | <i>Pseudosciaena crocea</i> (Yellow croaker)          | Pearl River Delta    | [35]   |
| 672 | <i>Acanthopagrus latus</i> (Yellow seafin)            | Pearl River Delta    | [35]   |
| 673 | <i>Pseudosciaena crocea</i> (large yellow croaker)    | coasts of East China | [198]  |
| 674 | <i>Pseudosciaena polyactis</i> (small yellow croaker) | coasts of East China | [198]  |
| 675 | <i>Pampus argenteus</i> (silver pomfret)              | coasts of East China | [198]  |
| 676 | <i>Clupanodon thrissa</i>                             | Shantou              | [32]   |
| 677 | <i>Decapterus</i>                                     | Shantou              | [32]   |
| 678 | <i>Maruadsi</i>                                       | Shantou              | [32]   |
| 679 | <i>Dipturus</i>                                       | Shantou              | [32]   |
| 680 | <i>Kwangtungensis</i>                                 | Shantou              | [32]   |
| 681 | <i>Hyporhamphus</i>                                   | Shantou              | [32]   |
| 682 | <i>Dussumieri</i>                                     | Shantou              | [32]   |
| 683 | <i>Johnius belangerii</i>                             | Shantou              | [32]   |
| 684 | <i>Nemipterus</i>                                     | Shantou              | [32]   |
| 685 | <i>Virgatus</i>                                       | Shantou              | [32]   |
| 686 | <i>Paraplagusia</i>                                   | Shantou              | [32]   |
| 687 | <i>Japonica</i>                                       | Shantou              | [32]   |
| 688 | <i>Pardachirus</i>                                    | Shantou              | [32]   |
| 689 | <i>Pavoninus</i>                                      | Shantou              | [32]   |
| 690 | <i>Pleuronichthys</i>                                 | Shantou              | [32]   |
| 691 | <i>Cornutus</i>                                       | Shantou              | [32]   |
| 692 | <i>Scorpaena neglecta</i>                             | Shantou              | [32]   |
| 693 | <i>Siganus</i>                                        | Shantou              | [32]   |
| 694 | <i>Canaliculatus</i>                                  | Shantou              | [32]   |

| ID  | Name of fish species*     | Location            | Source |
|-----|---------------------------|---------------------|--------|
| 695 | <i>Sillago sihama</i>     | Shantou             | [32]   |
| 696 | <i>Thamnaconus</i>        | Shantou             | [32]   |
| 697 | <i>Hypargyreus</i>        | Shantou             | [32]   |
| 698 | <i>Trichiurus</i> sp.     | Shantou             | [32]   |
| 699 | <i>Trypauchen vagina</i>  | Shantou             | [32]   |
| 700 | <i>Iniistius verrens</i>  | Shantou             | [32]   |
| 701 | <i>Acentrogobius</i>      | Pearl River Estuary | [32]   |
| 702 | <i>Chlorostigmatoides</i> | Pearl River Estuary | [32]   |
| 703 | <i>Acentrogobius</i> sp.  | Pearl River Estuary | [32]   |
| 704 | <i>Coilia mystus</i>      | Pearl River Estuary | [32]   |
| 705 | <i>Konosirus</i>          | Pearl River Estuary | [32]   |
| 706 | <i>punctatus</i>          | Pearl River Estuary | [32]   |
| 707 | <i>Lateolabrax</i>        | Pearl River Estuary | [32]   |
| 708 | <i>japonicus</i>          | Pearl River Estuary | [32]   |
| 709 | <i>Mugil cephalus</i>     | Pearl River Estuary | [32]   |
| 710 | <i>Odontamblyopus</i>     | Pearl River Estuary | [32]   |
| 711 | <i>Lacepedii</i>          | Pearl River Estuary | [32]   |
| 712 | <i>Onigocia</i>           | Pearl River Estuary | [32]   |
| 713 | <i>Macrolepis</i>         | Pearl River Estuary | [32]   |
| 714 | <i>Sardinella albella</i> | Pearl River Estuary | [32]   |
| 715 | <i>Siganus</i>            | Pearl River Estuary | [32]   |
| 716 | <i>Canaliculatus</i>      | Pearl River Estuary | [32]   |
| 717 | <i>Sillago sihama</i>     | Pearl River Estuary | [32]   |
| 718 | <i>Taenioides</i>         | Pearl River Estuary | [32]   |
| 719 | <i>Anguillaris</i>        | Pearl River Estuary | [32]   |
| 720 | <i>Trypauchen vagina</i>  | Pearl River Estuary | [32]   |
| 721 | <i>Branchiostegus</i>     | Beihai              | [32]   |
| 722 | <i>Argentatus</i>         | Beihai              | [32]   |
| 723 | <i>Decapterus</i>         | Beihai              | [32]   |
| 724 | <i>Maruadsi</i>           | Beihai              | [32]   |
| 725 | <i>Evynnis cardinalis</i> | Beihai              | [32]   |
| 726 | <i>Exocoetus volitans</i> | Beihai              | [32]   |
| 727 | <i>Nemipterus</i>         | Beihai              | [32]   |
| 728 | <i>Virgatus</i>           | Beihai              | [32]   |
| 729 | <i>Trichiurus</i> sp.     | Beihai              | [32]   |
| 730 | <i>Sphyraena pinguis</i>  | Beihai              | [32]   |
| 731 | <i>Siganus</i>            | Beihai              | [32]   |
| 732 | <i>Canaliculatus</i>      | Beihai              | [32]   |
| 733 | <i>Psenopsis anomala</i>  | Beihai              | [32]   |
| 734 | <i>Trachurus</i>          | Beihai              | [32]   |
| 735 | <i>Japonicus</i>          | Beihai              | [32]   |
| 736 | <i>Ariomma indicum</i>    | Sanya               | [32]   |
| 737 | <i>Branchiostegus</i>     | Sanya               | [32]   |
| 738 | <i>Auratus</i>            | Sanya               | [32]   |

| ID  | Name of fish species*                          | Location        | Source |
|-----|------------------------------------------------|-----------------|--------|
| 739 | Decapterus                                     | Sanya           | [32]   |
| 740 | Maruadsi                                       | Sanya           | [32]   |
| 741 | Evynnis cardinalis                             | Sanya           | [32]   |
| 742 | Johnius belangerii                             | Sanya           | [32]   |
| 743 | Konosirus                                      | Sanya           | [32]   |
| 744 | Punctatus                                      | Sanya           | [32]   |
| 745 | Mene maculata                                  | Sanya           | [32]   |
| 746 | Nemipterus                                     | Sanya           | [32]   |
| 747 | Virgatus                                       | Sanya           | [32]   |
| 748 | Polydactylus                                   | Sanya           | [32]   |
| 749 | Sextarius                                      | Sanya           | [32]   |
| 750 | Sargocentron                                   | Sanya           | [32]   |
| 751 | Caudimaculatum                                 | Sanya           | [32]   |
| 752 | Siganus                                        | Sanya           | [32]   |
| 753 | Canaliculatus                                  | Sanya           | [32]   |
| 754 | Terapon theraps                                | Sanya           | [32]   |
| 755 | Amblyglyphidodon                               | Xisha           | [32]   |
| 756 | Curacao                                        | Xisha           | [32]   |
| 757 | Apogonichthys sp.                              | Xisha           | [32]   |
| 758 | Caesio caerulea                                | Xisha           | [32]   |
| 759 | Chaetodon rafflesii                            | Xisha           | [32]   |
| 760 | Gnathodentex                                   | Xisha           | [32]   |
| 761 | aureolineatus                                  | Xisha           | [32]   |
| 762 | Zanclus cornutus                               | Xisha           | [32]   |
| 763 | Gnathodentex                                   | Nansha          | [32]   |
| 764 | Aureolineatus                                  | Islands         | [32]   |
| 765 | Cephalopholis                                  | Nansha          | [32]   |
| 766 | Spiloparaea                                    | Islands         | [32]   |
| 767 | Parapercis pacifica                            | Nansha          | [32]   |
| 768 | Exocoetus sp.                                  | Islands         | [32]   |
| 769 | Nemipterus virgatus (besugo)                   | Chinese markets | [201]  |
| 770 | Lateolabrax japonicus (Japanese sea bass)      | Chinese markets | [201]  |
| 771 | Paralichthys olivaceus (pacific fluke)         | Chinese markets | [201]  |
| 772 | Trichiurus haumela (belt fish)                 | Chinese markets | [201]  |
| 773 | Pseudosciaena polyactis (small yellow croaker) | Chinese markets | [201]  |
| 774 | Lepomis macrochirus (bluegill Sunfish)         | Chinese markets | [201]  |
| 775 | Pampus argenteus (silvery pomfret)             | Chinese markets | [201]  |
| 776 | Scomberomorus niphonius (pacific mackerel)     | Chinese markets | [201]  |
| 777 | Pseudosciaena crocea (large yellowcroaker)     | Chinese markets | [201]  |
| 778 | Trachinotus ovatus (pompano)                   | Chinese markets | [201]  |
| 779 | Pagrus major (Red seabream)                    | Fujian          | [192]  |
| 780 | Sciaenops ocellatus (Red drum)                 | Fujian          | [192]  |
| 781 | Acanthopagrus schlegelii (black seabream)      | Fujian          | [192]  |
| 782 | Liza haematocheilus (Mullet)                   | Laizhou Bay     | [1]    |

| ID  | Name of fish species*                         | Location    | Source |
|-----|-----------------------------------------------|-------------|--------|
| 783 | Platycephalus indicus (Flathead fish)         | Laizhou Bay | [1]    |
| 784 | Lateolabrax japonicus (Sea bass)              | Laizhou Bay | [1]    |
| 785 | Scomberomorus niphonius (Mackerel)            | Laizhou Bay | [1]    |
| 786 | Pampus argenteus (Silver pomfret)             | Laizhou Bay | [1]    |
| 787 | Mullet                                        | Laizhou Bay | [1]    |
| 788 | Flathead fish                                 | Laizhou Bay | [1]    |
| 789 | Mackerel                                      | Laizhou Bay | [1]    |
| 790 | Silver pomfret                                | Laizhou Bay | [1]    |
| 791 | Sea bass                                      | Laizhou Bay | [1]    |
| 792 | Ocean sunfish                                 | Taiwan      | [186]  |
| 793 | Milkfish                                      | Taiwan      | [186]  |
| 794 | Threadfin                                     | Taiwan      | [186]  |
| 795 | Hairtail                                      | Taiwan      | [186]  |
| 796 | Mackerels                                     | Taiwan      | [186]  |
| 797 | Narrow barred spanish                         | Taiwan      | [186]  |
| 798 | Salmon                                        | Taiwan      | [186]  |
| 799 | Korean mackerels                              | Taiwan      | [186]  |
| 800 | Greater amberjack                             | Taiwan      | [186]  |
| 801 | Cod                                           | Taiwan      | [186]  |
| 802 | Tilapia                                       | Taiwan      | [186]  |
| 803 | Tuna                                          | Taiwan      | [186]  |
| 804 | Red porgy                                     | Taiwan      | [186]  |
| 805 | Shark                                         | Taiwan      | [186]  |
| 806 | Swordfish                                     | Taiwan      | [186]  |
| 807 | Oreochromis spp.                              | Taiwan      | [28]   |
| 808 | Pampus argenteus                              | Taiwan      | [28]   |
| 809 | Psenopsis anomala                             | Taiwan      | [28]   |
| 810 | Chanos chanos                                 | Taiwan      | [28]   |
| 811 | Salmo salar                                   | Taiwan      | [28]   |
| 812 | Nemipterus virgatus                           | Taiwan      | [28]   |
| 813 | Trichiurus lepturus                           | Taiwan      | [28]   |
| 814 | Hippoglossus spp.                             | Taiwan      | [28]   |
| 815 | Epinephelus spp.                              | Taiwan      | [28]   |
| 816 | Rachycentron canadum                          | Taiwan      | [28]   |
| 817 | Istiophoridae spp.                            | Taiwan      | [28]   |
| 818 | Scomberomorus commerson                       | Taiwan      | [28]   |
| 819 | Thunnus spp.                                  | Taiwan      | [28]   |
| 820 | Lutjanus campechanus (red snapper)            | Hong Kong   | [53]   |
| 821 | Epinephelus coioides (orange-spotted grouper) | Hong Kong   | [53]   |
| 822 | Trachinotus blochii (snubnose pompano)        | Hong Kong   | [53]   |
| 823 | Hypophthalmichthys molitrix (silver carp)     | Hong Kong   | [102]  |
| 824 | Ctenopharyngodon idellus (grass carp)         | Hong Kong   | [102]  |
| 825 | Carassius auratus (crucian carp)              | Hong Kong   | [102]  |
| 826 | Cyprinus carpio (carp)                        | Hong Kong   | [102]  |

| ID  | Name of fish species*                                | Location        | Source |
|-----|------------------------------------------------------|-----------------|--------|
| 827 | <i>Coreius heterodom</i> ,                           | Hong Kong       | [102]  |
| 828 | <i>Silurus asotus</i> (catfish)                      | Hong Kong       | [102]  |
| 829 | <i>Pelteobagrus fulvidraco</i> (yellow-head catfish) | Hong Kong       | [102]  |
| 830 | <i>Leiognathus rivulatus</i> (Okihiragi)             | South China Sea | [33]   |
| 831 | <i>Upeneus moluccensis</i> (Kisujihimeji)            | South China Sea | [33]   |
| 832 | <i>Priacanthus macracanthus</i> (Kintokidai)         | South China Sea | [33]   |
| 833 | <i>Thamnaconus tessellatus</i> (Sarasahagi)          | South China Sea | [33]   |
| 834 | <i>Psenopsis anomala</i> (Ibodai)                    | South China Sea | [33]   |
| 835 | <i>Nemipterus bathybius</i> (Sokoitoyori)            | South China Sea | [33]   |
| 836 | <i>Lepidotrigla alata</i> (Igodakahoderi)            | South China Sea | [33]   |
| 837 | <i>Caranx equula</i> (Kaiwari)                       | South China Sea | [33]   |
| 838 | <i>Uranoscopus japonicus</i> (Mishimaokoze)          | South China Sea | [33]   |
| 839 | <i>Saurida elongata</i> (Tokageeso)                  | South China Sea | [33]   |
| 840 | Acropomatidae                                        | East China Sea  | [17]   |
| 841 | <i>Acropoma japonicum</i>                            | East China Sea  | [17]   |
| 842 | <i>Doederleinia berycoides</i>                       | East China Sea  | [17]   |
| 843 | <i>Malakichthys wakiyae</i>                          | East China Sea  | [17]   |
| 844 | <i>Synagrops japonicus</i>                           | East China Sea  | [17]   |
| 845 | Apogonidae                                           | East China Sea  | [17]   |
| 846 | <i>Apogon lineatus</i>                               | East China Sea  | [17]   |
| 847 | Argentinidae                                         | East China Sea  | [17]   |
| 848 | <i>Argentina kagoshimae</i>                          | East China Sea  | [17]   |
| 849 | <i>Glossanodon semifasciatus</i>                     | East China Sea  | [17]   |
| 850 | Aulopidae                                            | East China Sea  | [17]   |
| 851 | <i>Aulopus japonicus</i>                             | East China Sea  | [17]   |
| 852 | Bembridae                                            | East China Sea  | [17]   |
| 853 | <i>Bembras japonica</i>                              | East China Sea  | [17]   |
| 854 | <i>Chascanopsetta lugubris</i>                       | East China Sea  | [17]   |
| 855 | Centriscidae                                         | East China Sea  | [17]   |
| 856 | <i>Macroramphosus scolopax</i>                       | East China Sea  | [17]   |
| 857 | Chaunacidae                                          | East China Sea  | [17]   |
| 858 | <i>Chaunax abei</i>                                  | East China Sea  | [17]   |
| 859 | Chlorophthalmidae                                    | East China Sea  | [17]   |
| 860 | <i>Chlorophthalmus acutifrons</i>                    | East China Sea  | [17]   |
| 861 | Congridae                                            | East China Sea  | [17]   |
| 862 | <i>Ariosoma shiroanago major</i>                     | East China Sea  | [17]   |
| 863 | <i>Conger myriaster</i>                              | East China Sea  | [17]   |
| 864 | Dalatiidae                                           | East China Sea  | [17]   |
| 865 | <i>Etmopterus lucifer</i>                            | East China Sea  | [17]   |
| 866 | Gobiidae                                             | East China Sea  | [17]   |
| 867 | <i>Amblychaeturichthys sciiustus</i>                 | East China Sea  | [17]   |
| 868 | Hexanchidae                                          | East China Sea  | [17]   |
| 869 | <i>Heptranchias perlo</i>                            | East China Sea  | [17]   |
| 870 | Macrouridae                                          | East China Sea  | [17]   |



| ID  | Name of fish species*                               | Location         | Source |
|-----|-----------------------------------------------------|------------------|--------|
| 871 | <i>Caelorinchus multispinulosus</i>                 | East China Sea   | [17]   |
| 872 | <i>Caelorinchus productus</i>                       | East China Sea   | [17]   |
| 873 | Monacanthidae                                       | East China Sea   | [17]   |
| 874 | <i>Thamnaconus hypargyreus</i>                      | East China Sea   | [17]   |
| 875 | Mullidae                                            | East China Sea   | [17]   |
| 876 | <i>Upeneus japonicus</i>                            | East China Sea   | [17]   |
| 877 | Myctophidae                                         | East China Sea   | [17]   |
| 878 | <i>Diaphus watasei</i>                              | East China Sea   | [17]   |
| 879 | Ophidiidae                                          | East China Sea   | [17]   |
| 880 | <i>Hoplobrotula armata</i>                          | East China Sea   | [17]   |
| 881 | <i>Neobythites sivicola</i>                         | East China Sea   | [17]   |
| 882 | Pleuronectidae                                      | East China Sea   | [17]   |
| 883 | <i>Pleuronichthys</i> sp.                           | East China Sea   | [17]   |
| 884 | Peristediidae                                       | East China Sea   | [17]   |
| 885 | <i>Peristedion cataphractum</i>                     | East China Sea   | [17]   |
| 886 | Rajidae                                             | East China Sea   | [17]   |
| 887 | <i>Raja kenojei</i>                                 | East China Sea   | [17]   |
| 888 | <i>Raja kwangtungensis</i>                          | East China Sea   | [17]   |
| 889 | Sebastidae                                          | East China Sea   | [17]   |
| 890 | <i>Helicolenus hilgendorfi</i>                      | East China Sea   | [17]   |
| 891 | Sparidae                                            | East China Sea   | [17]   |
| 892 | <i>Dentex tumifrons</i>                             | East China Sea   | [17]   |
| 893 | Squalidae                                           | East China Sea   | [17]   |
| 894 | <i>Squalus japonicus</i>                            | East China Sea   | [17]   |
| 895 | Synodontidae                                        | East China Sea   | [17]   |
| 896 | <i>Synodus macrops</i>                              | East China Sea   | [17]   |
| 897 | Trichiuridae                                        | East China Sea   | [17]   |
| 898 | <i>Trichiurus japonicus</i>                         | East China Sea   | [17]   |
| 899 | Triglidae                                           | East China Sea   | [17]   |
| 900 | <i>Lepidotrigla guentheri</i>                       | East China Sea   | [17]   |
| 901 | <i>Trachinotus blochii</i> (silver pomfret)         | Shanghai markets | [153]  |
| 902 | <i>Tenualosa reevesii</i> (reeves shad)             | Shanghai markets | [153]  |
| 903 | <i>Lepturacanthus savala</i> ( smallhead hairtail ) | Shanghai markets | [153]  |
| 904 | <i>Pseudosciaena crocea</i> ( large yellow croaker) | Shanghai markets | [153]  |

**Table S5** Lifespans of fish in aquatic ecosystems in China from samples reported in the literature. *\*Average values that are available in the literature; NA: data not available.*

| Location                    | Range  | Medium | Fish type | Feeding habit | No. of species | No. of samples | Sampling year | Data source |
|-----------------------------|--------|--------|-----------|---------------|----------------|----------------|---------------|-------------|
| Beihai, Guangxi             | 0—1    | 0.5    | Wm        | C/H           | 10             | 155            | 2008-2010     | [32]        |
| Pearl River Estuary         | 0—2    | 1      | Wm        | C/O/H/P       | 13             | 158            | 2008-2010     | [32]        |
| Shantou                     | 0—3    | 1.5    | Wm        | C/O/H/P       | 16             | 196            | 2008-2009     | [32]        |
| Sanya                       | 0—3    | 1.5    | Wm        | C/H           | 12             | 108            | 2008-2010     | [32]        |
| Bohaiwan Bay                | 1—5    | 3      | Wm        | C/O/H         | 22             | 368            | 1980-1981     | [13]        |
| Bohaiwan Bay                | 1—6    | 3.5    | Wm        | C/O/H         | 15             | 183            | 1980-1981     | [13]        |
| Yangtze River               | 0—7    | 3.5    | Wf        | C/O/H         | 7              | 292            | 2012          | [102]       |
| Hongfeng reservoir, Guizhou | 1—2    | 1.5    | Ff        | C/O/H         | 8              | 70             | 2009          | [73]        |
| Baihua reservoir, Guizhou   | 1—2    | 1.5    | Ff        | C/O/H         | 5              | 58             | 1989          | [74]        |
| Second Songhua River        | 1—3    | 2      | Ff        | C/O/H         | 9              | 56             | 2009          | [143]       |
| Baihua reservoir            | 1—5    | 3      | Ff        | C/O/H         | 9              | 64             | 2003          | [52]        |
| Coastal watersheds          | 1—2    | 1.5    | Wf        | O             | 1              | 36             | 2008          | [145]       |
| Three Gorges Reservoir      | 1—2    | 1.5    | Wf        | C/O/P         | 5              | 74             | 2004-2005     | [79]        |
| Second Songhua River        | 1—3    | 2      | Wf        | C/O/H         | 11             | 164            | 2005          | [141]       |
| Songhua River               | 1—3    | 2      | Wf        | C/O/H         | 11             | 164            | 2005          | [141]       |
| Upstream of Yangtze River   | 1—3    | 2      | Wf        | C/O/H         | 12             | 50             | 1980-2005     | [89]        |
| Three-Gorge Reservoir       | 1—3    | 2      | Wf        | C/O/H         | 11             | 164            | 2011          | [77]        |
| Gaobeidian Lake, Beijing    | 1—4    | 2.5    | Wf        | NA            | 5              | 19             | 2006          | [162]       |
| Qingtongxia Reservoir       | 1—4    | 2.5    | Wf        | C/O/H         | NA             | 55             | 1983          | [108]       |
| Wujiang River               | 1—6    | 3.5    | Wf        | C/O/H         | 10             | 188            | 1989-1990     | [70]        |
| Hulun Buir Grassland        | 1—7    | 4      | Wf        | C/O/H         | 9              | 90             | 1983          | [190]       |
| Three Geoges Reservoir      | 1—3    | 2*     | Wf        | C/O/H         | 19             | 80             | 1997          | [92]        |
| Ningxia                     | 1—4    | 2*     | Wf        | C/O/H         | 7              | 160            | 1988          | [109]       |
| Baihua Reservoir, Guizhou   | 1—4    | 2.3*   | Wf        | C/O/H/P       | 9              | 128            | 2003          | [51]        |
| Guizhou Province            | 1—6    | 2.8*   | Wf        | C/O/H         | 10             | 188            | 1989-1990     | [68]        |
| Pearl River Delta           | 2—3    | 2.5    | Wf        | C/O/H         | 16             | 48             | 2009          | [168]       |
| Wujiang River               | 1—6    | 3*     | Wf        | C/O/H         | 10             | 188            | 1989-1990     | [67]        |
| Wujiang River               | 1—6    | 3*     | Wf        | C/O/H         | 6              | 92             | 1991          | [66]        |
| Tibetan (Niyang River)      | 4—6    | 5      | Wf        | O             | 2              | 8              | 2007          | [181]       |
| 8 alpine lakes, Tibet       | 6—10.4 | 8.2    | Wf        | C/O/H         | 7              | 62             | 2006-2007     | [179]       |
| 7 rivers and 6 lakes, Tibet | 2.7—32 | 10*    | Wf        | C/O/H         | 13             | 166            | 2009-2010     | [180]       |

**Table S6** Concentrations of the total mercury ( $\mu\text{g L}^{-1}$ ) and methylmercury ( $\text{ng L}^{-1}$ ) in Chinese seawater and freshwater (supplemented based on references [204, 205]).

| Location                       | Total mercury/ $\mu\text{g.L}^{-1}$ |       |        |        | Methylmercury/ $\text{ng.L}^{-1}$ |       |       |        | Data source |
|--------------------------------|-------------------------------------|-------|--------|--------|-----------------------------------|-------|-------|--------|-------------|
|                                | Mean                                | SD    | Min    | Max    | Mean                              | SD    | Min   | Max    |             |
| <b>Sea Waters</b>              |                                     |       |        |        |                                   |       |       |        |             |
| Bohai & Yellow Sea             | 1.100                               | 0.130 | 0.870  | 1.500  | NA                                | NA    | NA    | NA     | [145]       |
| Tianjin                        | 0.334                               | NA    | NA     | NA     | 0.570                             | NA    | NA    | NA     | [206]       |
| Pearl River Estuary            | 0.001                               | NA    | 0.0004 | 0.002  | NA                                | NA    | NA    | NA     | [207]       |
| Pearl River Delta              | 0.027                               | 0.008 | 0.015  | 0.044  | 0.410                             | 0.150 | 0.160 | 0.700  | [172]       |
| Yellow Sea                     | 0.003                               | NA    | 0.001  | 0.006  | NA                                | NA    | NA    | NA     | [208]       |
| Beidaihe                       | 0.032                               | NA    | NA     | NA     | 2.617                             | NA    | NA    | NA     | [206]       |
| Dalian                         | 0.040                               | NA    | NA     | NA     | 0.879                             | NA    | NA    | NA     | [206]       |
| Daya Bay, Hailing Bay          | 0.058                               | 0.028 | 0.030  | 0.493  | NA                                | NA    | NA    | NA     | [39]        |
| Laizhou Bay                    | 0.066                               | 0.016 | 0.044  | 0.097  | NA                                | NA    | NA    | NA     | [1]         |
| Huludao                        | 0.084                               | NA    |        |        | 2.457                             | NA    | NA    | NA     | [206]       |
| East China Sea                 | NA                                  | NA    | 0.002  | 0.093  | NA                                | NA    | NA    | NA     | [204]       |
| East China sea                 | NA                                  | NA    | 0.018  | 0.026  | NA                                | NA    | NA    | NA     | [27]        |
| Xiamen                         | 0.212                               | NA    | NA     | NA     | 0.626                             | NA    | NA    | NA     | [206]       |
| Qingdao                        | 0.266                               | NA    | NA     | NA     | 0.230                             | NA    | NA    | NA     | [206]       |
| Yingkou                        | 0.302                               | NA    | NA     | NA     | 0.836                             | NA    | NA    | NA     | [206]       |
| Daya Bay/Hailing Bay           | 0.310                               | 0.260 | 0.120  | 0.490  | NA                                | NA    | NA    | NA     | [196]       |
| Guangzhou                      | 0.316                               | NA    | NA     | NA     | 0.414                             | NA    | NA    | NA     | [206]       |
| Yantai                         | 0.320                               | NA    | NA     | NA     | 0.301                             | NA    | NA    | NA     | [206]       |
| Wuli Estuary                   | 0.690                               | NA    | 0.084  | 2.700  | NA                                | NA    | 0.046 | 0.064  | [204]       |
| South China Sea                | 0.001                               | NA    | 0.001  | 0.002  | 0.120                             | NA    | 0.050 | 0.220  | [209]       |
| Wuli                           | 0.139                               | NA    | 0.039  | 0.430  | 0.120                             | NA    | 0.046 | 0.280  | [210]       |
| <b>Freshwater</b>              |                                     |       |        |        |                                   |       |       |        |             |
| Yalung Tsangpo River, Tibet    | 0.003                               | NA    | 0.001  | 0.005  | 0.120                             | NA    | 0.060 | 0.290  | [211]       |
| Yinzidu Reservoir, Guizhou     | 0.001                               | NA    | 0.0004 | 0.002  | NA                                | NA    | 0.028 | 0.440  | [212]       |
| Suofengying Reservoir, Guizhou | 0.001                               | NA    | 0.0004 | 0.005  | 0.110                             | NA    | 0.030 | 0.220  | [63]        |
| Hongjiadu Reservoir, Guizhou   | 0.001                               | NA    | 0.0003 | 0.007  | 0.110                             | NA    | 0.050 | 0.170  | [63]        |
| Puding Reservoir, Guizhou      | 0.003                               | NA    | 0.001  | 0.012  | 0.320                             | NA    | 0.060 | 0.510  | [63]        |
| Mt. Gongga Stream, Guizhou     | 0.004                               | NA    | 0.002  | 0.007  | NA                                | NA    | NA    | NA     | [213]       |
| Caohai Lake, Guizhou           | 0.005                               | NA    | 0.002  | 0.009  | 0.250                             | NA    | 0.110 | 0.670  | [204]       |
| Hongfeng Reservoir, Guizhou    | 0.007                               | NA    | 0.003  | 0.014  | NA                                | NA    | 0.050 | 0.330  | [48]        |
| Baihua Reservoir, Guizhou      | 0.007                               | 0.005 | 0.001  | 0.020  | 0.500                             | 0.600 | 0.030 | 3.000  | [51]        |
| Baihua Reservoir, Guizhou      | NA                                  | NA    | 0.020  | 0.120  | NA                                | NA    | 8.000 | 36.000 | [53]        |
| Baihua Reservoir, Guizhou      | 0.076                               | NA    | 0.002  | 0.336  | NA                                | NA    | NA    | NA     | [204]       |
| Hongfeng Reservoir, Guizhou    | 0.007                               | NA    | 0.003  | 0.014  | NA                                | NA    | 0.053 | 0.330  | [204]       |
| Hongfeng Reservoir             | 7.500                               | 3.500 | 5.050  | 15.200 | 0.150                             | 0.100 | 0.050 | 0.350  | [49]        |
| Aha Reservoir, Guizhou         | 0.008                               | NA    | 0.002  | 0.017  | 0.370                             | NA    | 0.030 | 0.970  | [214]       |
| Luchongguan Stream, Guizhou    | 0.009                               | NA    | NA     | NA     | NA                                | NA    | NA    | NA     | [215]       |
| Dongfeng Reservoir, Guizhou    | 0.009                               | NA    | 0.001  | 0.040  | 0.750                             | NA    | 0.250 | 1.600  | [216]       |
| Wujiangdu Reservoir, Guizhou   | 0.011                               | NA    | 0.006  | 0.026  | 0.870                             | NA    | 0.470 | 1.760  | [216]       |
| Wujiang River, Guizhou         | 0.001                               | 0.001 | 0.0001 | 0.007  | 0.110                             | 0.030 | 0.050 | 0.170  | [63]        |

|                                   |       |       |       |        |       |       |       |        |       |
|-----------------------------------|-------|-------|-------|--------|-------|-------|-------|--------|-------|
| Wujiang River, Guizhou            | NA    | NA    | 0.036 | 0.050  | NA    | NA    | NA    | NA     | [64]  |
| Wujiang River, Guizhou            | 0.042 | NA    | 0.003 | 0.330  | 0.145 |       | 0.070 | 0.700  | [204] |
| Wujiang River, Guizhou            | 0.044 | NA    | 0.011 | 0.330  | NA    | NA    | NA    | NA     | [217] |
| Wujiang River, Guizhou            | NA    | NA    | 0.020 | 1.460  | NA    | NA    | NA    | NA     | [62]  |
| River in Wanshan Hg mine, Guizhou | NA    | NA    | NA    | 9.300  | NA    | NA    | 0.310 | 25.000 | [54]  |
| Second Songhua River              | 0.033 | NA    | 0.009 | 0.069  | 1.000 | 0.590 | 0.400 | 1.900  | [140] |
| Second Songhua River              | 0.035 | 0.010 | NA    | NA     | NA    | NA    | NA    | NA     | [143] |
| Second Songhua River              | 0.190 | 0.024 | 0.173 | 0.233  | NA    | NA    | NA    | NA     | [141] |
| Songhua River                     | 0.056 | 0.009 | 0.049 | 0.068  | NA    | NA    | NA    | NA     | [141] |
| Sanjiang Plain River              | 0.053 | NA    | 0.034 | 0.078  | NA    | NA    | NA    | NA     | [131] |
| TieShanPing Stream, Chongqing     | 0.006 | NA    | NA    | NA     | NA    | NA    | NA    | NA     | [215] |
| Lijiang River                     | 0.120 | NA    | 0.051 | 0.270  | NA    | NA    | NA    | NA     | [218] |
| Tianjin (rivers)                  | 0.250 | 0.060 | 0.200 | 0.300  | NA    | NA    | NA    | NA     | [166] |
| Huangpu River                     | 0.440 | NA    | 0.012 | 1.580  | NA    | NA    | NA    | NA     | [219] |
| Zaohe River, Shaanxi              | 0.450 | NA    | 0.099 | 0.990  | NA    | NA    | NA    | NA     | [220] |
| River in Hunan Sb mining area     | 0.690 | 0.750 | NA    | NA     | NA    | NA    | NA    | NA     | [202] |
| Wuli River                        | 0.690 | NA    | 0.084 | 27.000 | 0.720 | NA    | 0.048 | 3.000  | [210] |

**Table S7** Concentrations of the total mercury (mg kg<sup>-1</sup>; dw) and methylmercury (µg kg<sup>-1</sup>; dw) in Chinese freshwater sediments and marine sediments (supplemented based on references [204, 205]).

| Location                         | Total mercury/mg.kg <sup>-1</sup> ; dw |       |        |        | Methylmercury/ug.kg <sup>-1</sup> ; dw |       |       |       | Data source |
|----------------------------------|----------------------------------------|-------|--------|--------|----------------------------------------|-------|-------|-------|-------------|
|                                  | Mean                                   | SD    | Min    | Max    | Mean                                   | SD    | Min   | Max   |             |
| <b><i>Marine sediment</i></b>    |                                        |       |        |        |                                        |       |       |       |             |
| Coastal watersheds               | 0.027                                  | 0.028 | 0.017  | 0.180  | NA                                     | NA    | NA    | NA    | [145]       |
| East China Sea                   | NA                                     | NA    | 0.004  | 0.048  | NA                                     | NA    | NA    | NA    | [221]       |
| East China Sea                   | NA                                     | NA    | 0.042  | 0.072  | NA                                     | NA    | NA    | NA    | [27]        |
| East China Sea                   | 0.037                                  | NA    | 0.001  | 0.080  | NA                                     | NA    | NA    | NA    | [222]       |
| Hong kong                        | NA                                     | NA    | 0.057  | 0.094  | NA                                     | NA    | NA    | NA    | [171]       |
| Hainan Coast                     | 0.080                                  | NA    | 0.020  | 0.100  | NA                                     | NA    | NA    | NA    | [223]       |
| Daya Bay/Hailing Bay             | 0.083                                  | 0.008 | 0.078  | 0.089  | NA                                     | NA    | NA    | NA    | [196]       |
| Laizhou Bay                      | NA                                     | NA    | 0.018  | 0.380  | NA                                     | NA    | NA    | NA    | [204]       |
| East China Sea                   | NA                                     | NA    | 0.055  | 0.200  | NA                                     | NA    | 0.017 | 0.256 | [204]       |
| South China Sea                  | NA                                     | NA    | 0.020  | 0.130  | NA                                     | NA    | 0.010 | 0.053 | [204]       |
| Daya Bay, Hailing Bay            | 0.162                                  | 0.005 | 0.060  | 0.350  | NA                                     | NA    | NA    | NA    | [39]        |
| Southeast China Coast            | 0.189                                  | NA    | 0.002  | 0.904  | NA                                     | NA    | NA    | NA    | [224]       |
| Around Hong Kong                 | 0.220                                  | 0.088 | 0.143  | 0.560  | 1.270                                  | 0.800 | 0.340 | 5.600 | [178]       |
| Hong Kong                        | 0.220                                  | 0.088 | 0.150  | 0.470  | 1.270                                  | 0.800 | 0.180 | 3.180 | [178]       |
| Hong Kong                        | 0.900                                  | NA    | 0.0001 | 17.000 | NA                                     | NA    | NA    | NA    | [177]       |
| <b><i>Estuarine sediment</i></b> |                                        |       |        |        |                                        |       |       |       |             |
| Yellow River Delta               | 0.022                                  | 0.046 | 0.002  | 0.145  | NA                                     | NA    | NA    | NA    | [111]       |
| Pearl River Delta                | 0.054                                  |       | 0.002  | 0.201  | NA                                     | NA    | NA    | NA    | [225]       |
| Pearl river delta                | 0.150                                  | 0.050 | 0.070  | 0.230  | NA                                     | NA    | NA    | NA    | [35]        |
| Pearl river estuary              | 0.202                                  | NA    | NA     | NA     | NA                                     | NA    | NA    | NA    | [34]        |
| Pearl River Delta                | NA                                     | NA    | 0.096  | 2.000  | NA                                     | NA    | NA    | NA    | [171]       |
| Pearl River Delta                | 0.300                                  | 0.030 | 0.250  | 0.370  | 1.300                                  | 0.440 | 0.350 | 1.970 | [172]       |
| Pearl River Delta                | 0.240                                  | 0.090 | 0.033  | 0.390  | 0.630                                  | 0.270 | 0.180 | 1.250 | [170]       |
| Pearl River Estuary              | NA                                     | NA    | 0.002  | 0.200  | NA                                     | NA    | NA    | NA    | [207]       |
| Yellow River Estuary             | NA                                     | NA    | 0.012  | 0.120  | NA                                     | NA    | NA    | NA    | [226]       |
| Pearl River Delta                | NA                                     | NA    | 0.033  | 0.386  | NA                                     | NA    | NA    | NA    | [170]       |
| Pearl River Delta                | NA                                     | NA    | 0.163  | 0.474  | NA                                     | NA    | NA    | NA    | [178]       |
| <b><i>River sediment</i></b>     |                                        |       |        |        |                                        |       |       |       |             |
| Songhua River                    | 0.025                                  | 0.007 | 0.018  | 0.034  | NA                                     | NA    | NA    | NA    | [141]       |
| Sanjiang Plain                   | 0.055                                  | 0.012 | 0.020  | 0.200  | NA                                     | NA    | NA    | NA    | [131]       |
| Second Songhua River             | 0.055                                  | 0.008 | 0.047  | 0.068  | NA                                     | NA    | NA    | NA    | [141]       |
| Haihe River                      | 0.110                                  | NA    | 0.055  | 0.174  | 1.070                                  | NA    | 0.700 | 1.500 | [207]       |
| Wujiang River                    | 0.170                                  | 0.140 | 0.020  | 0.370  | NA                                     | NA    | NA    | NA    | [63]        |
| Yangtze River                    | 0.170                                  | NA    | 0.011  | 0.535  | NA                                     | NA    | NA    | NA    | [103]       |
| Grand Canal                      | NA                                     | NA    | 0.290  | 1.640  | NA                                     | NA    | NA    | NA    | [227]       |
| Second Songhua River             | 0.540                                  | NA    | 0.219  | 1.120  | NA                                     | NA    | NA    | NA    | [140]       |
| Yangtze River                    | 0.190                                  | 0.170 | 0.010  | 0.550  | NA                                     | NA    | NA    | NA    | [103]       |
| Huangpu River                    | 0.200                                  | NA    | 0.070  | 0.390  | NA                                     | NA    | NA    | NA    | [219]       |
| Lijiang River                    | 0.200                                  | NA    | 0.083  | 0.460  | NA                                     | NA    | NA    | NA    | [218]       |

|                                  |       |       |       |       |       |       |       |       |       |
|----------------------------------|-------|-------|-------|-------|-------|-------|-------|-------|-------|
| Second Songhua River             | 0.460 | 0.220 | 0.030 | 0.600 | 3.840 | NA    | NA    | NA    | [140] |
| Zaohe River                      | NA    | NA    | 0.032 | 0.377 | NA    | NA    | NA    | NA    | [220] |
| Zaohe River                      | NA    | NA    | 0.032 | 0.380 | NA    | NA    | NA    | NA    | [220] |
| Wujiang River                    | NA    | NA    | 0.131 | 0.360 | NA    | NA    | NA    | NA    | [64]  |
| Yangtze River                    | 0.220 | NA    | 0.080 | 0.440 | NA    | NA    | NA    | NA    | [103] |
| Haihe River                      | 1.037 | NA    | 0.055 | 8.778 | NA    | NA    | NA    | NA    | [207] |
| <b><i>Reservoir sediment</i></b> |       |       |       |       |       |       |       |       |       |
| Dongfeng Reservoir               | 0.170 | NA    | 0.140 | 0.230 | NA    | NA    | 0.100 | 2.800 | [204] |
| Aha Reservoir                    | 0.210 | NA    | 0.160 | 0.250 | 1.760 | NA    | 0.220 | 7.200 | [204] |
| Aha Reservoir                    | 0.215 | NA    | [214] |
| Wujiangdu Reservoir              | 0.250 | NA    | 0.140 | 0.370 | NA    | NA    | 0.100 | 7.900 | [204] |
| Wujiangdu Reservoir              | 0.255 | NA    | [216] |
| Hongfeng Reservoir               | 0.390 | 0.120 | 0.220 | 0.580 | 2.500 | 2.600 | 0.610 | 6.240 | [49]  |
| Hongfeng Reservoir               | 0.390 | NA    | NA    | NA    | 2.900 | NA    | NA    | NA    | [204] |
| Caohai Lake                      | 0.880 | NA    | 0.760 | 1.010 | 1.100 | NA    | 0.110 | 3.900 | [204] |
| Lake Taihu                       | 0.100 | 0.070 | 0.012 | 0.470 | 0.280 | 0.220 | 0.018 | 0.960 | [146] |
| Dongfeng Reservoir               | 0.168 | NA    | [216] |



## References:

1. Liu, J. H.; Cao, L.; Huang, W.; Dou, S. Z., Species- and tissue-specific mercury bioaccumulation in five fish species from Laizhou Bay in the Bohai Sea of China. *Chinese Journal of Oceanology and Limnology* **2013**, *31*, (3), 504-513.
2. Xia, C. H., Persistent Organic Pollutants and Trace Elements in Marine Fish from Chinese Coastal Waters: Levels, Distribution and Human Health Risk Assessment (in Chinese). Ph.D. Dissertation. University of Science and Technology of China **2011**.
3. Yan, X. P.; Li, Y.; Jiang, Y., Selective measurement of ultratrace methylmercury in fish by flow injection on-line microcolumn displacement sorption preconcentration and separation coupled with electrothermal atomic absorption spectrometry. *Analytical Chemistry* **2003**, *75*, (10), 2251-2255.
4. Song, Y. G.; Zhang, Y.; Ma, Z. Q.; Wang, N. B.; Chen, Y., The health risk assessments of mercury and arsenic contamination in Bayuquan area in Yingkou (in Chinese). *Hebei Fisheries* **2011**, *210*, (6), 9-11.
5. Kou, X.; Dong, Q.; Liu, X. P.; Tang, Y. S.; Liu, Y. H., Detection on Content of Mercury and Arsenic in Part Marine Products of Jinzhou Area (in Chinese). *J Anhui Agri Sci* **2010**, *38*, (14), 7506-7507.
6. Zhao, L. Q.; Yang, F.; Yan, X. W., Concentrations of Selected Trace Elements in Marine Bivalves and the Dietary Risk to Residents of Dalian City, Northern China. *Human and Ecological Risk Assessment* **2013**, *19*, (1), 145-150.
7. Zheng, N.; Wang, Q.; Zhang, X.; Zheng, D.; Zhang, Z.; Zhang, S., Population health risk due to dietary intake of heavy metals in the industrial area of Huludao city, China. *Science of the Total Environment* **2007**, *387*, (1-3), 96-104.
8. Wang, Y. X.; Li, Q.; Jiang, B.; Shi, M.; Ma, Y., Analysis of methylmercury level in some fishes that sold in Jilin Province in 2010 (in Chinese). *Chinese journal of health laboratory technology*, *21(9)2318-2319* **2011**, *21*, (9), 2318-2319.
9. Meng, F. X., A study on heavy metal content in several marine fishes along Weihai coastal Sea (in Chinese). Master Dissertation. Shandong University. **2006**.
10. Zhu, G.; Liu, W.; Zhu, Q.; Yang, Z., Determination of the Hg content in seafood from the markets in Taian. . *J Taishan Medical College* **2005**, *26*, (5), 443-444.
11. Gan, J.; Jia, X., Hygienic Quality for Heavy metals of economic fish in Coastal waters of China (in Chinese). *Marine Science Bulletin* **2002**, *16*, (4), 88-93.
12. Yan, Y., Evaluation on heavy metal pollution of economic fish in coastal waters of China (in Chinese). *Marine Environmental Science* **1993**, *12*, (3-4), 99-103.
13. Chen, X. L.; Zhang, Y. Q.; Chen, Z. Q., The chemical forms, accumulation and distribution of mercury in the organs and tissues of the fish from the Bohai Sea (in Chinese). *Marine Environmental Science* **1982**, *1*, (1), 66-74.
14. Miao, L.; Wang, J.; Liu, X., The Distribution of the Mercury Content in Chinese Marine Products and Their Safety Evaluation (in Chinese) *Modern Food Science and Technology* **2013**, *29*, (3), 687-691.
15. Liu, A. J.; Xu, Z. Z.; Liu, G. Z.; Deng, L. J.; Fang, H. D.; Huang, L. M., Inner- and inter-Species differences of mercury concentration in Common Fishes from the Yellow Sea (in Chinese). *Environmental Science & Technology* **2014**, *35*, (2), 764-769.
16. Huang, Z.; Pan, X. D.; Han, J. L.; Wu, P. G.; Tang, J.; Tan, Y., Determination of methylmercury in marine fish from coastal areas of Zhejiang, China. *Food Additives & Contaminants Part B-Surveillance* **2012**, *5*, (3), 182-187.
17. Asante, K. A.; Agusa, T.; Mochizuki, H.; Ramu, K.; Inoue, S.; Kubodera, T.; Takahashi, S.; Subramanian, A.; Tanabe, S., Trace elements and stable isotopes ( $\delta^{13}\text{C}$  and  $\delta^{15}\text{N}$ ) in shallow and deep-water organisms from the East China Sea. *Environmental Pollution* **2008**, *156*, (3), 862-873.
18. Arima, S., Total Mercury Level of Fish Caught in East China Sea (in Japanese). *Mem. Fac. Fish. Kagoshima Univ.* **1985**, *34*, (1), 1-6.
19. Chen, X. S.; Chu, M. F.; Peng, Z.; Gao, S.; Liu, Z. T.; Li, Z. H., Detection and evaluation of heavy metals in seafood from Hangzhou market (in Chinese). *Chin J Health Lab Tec* **2014**, *24*, (8), 1176-1179.
20. Sun, W.; Liu, X.; Pan, J.; Wen, H., Levels of heavy metals in commercial fish species from the near-shore of Zhejiang Province (in Chinese). *Journal of Zhejiang University (Science edition)* **2012**, *39*, (3), 338-344.
21. Ye, F. X., Study on the mercury pollution in the sea food of Ningbo (in Chinese). *Environmental Pollution & Control* **2002**, *24*,



(2), 106-108.

22. Gao, Z. J.; Wang, L. N.; Zheng, H. B.; Yao, X. P., Analysis of heavy metals pollution status in seafoods from Ningbo in 2012 (in Chinese). *Chin J Health Lab Tec* **2013**, *23*, (15), 3114-3116.
23. Zhou, Q. X.; Wu, J. H.; Weng, Y. L.; Qian, Y. F.; Shen, Z. H.; Ying, T. E.; Wang, H. Y., Analysis of mercury pollution of economic marine fish (in Chinese). *Chinese Journal of Preventive Medicine* **2007**, *8*, (1), 56-58.
24. He, J. L., Analysis of methylmercury residue in seafish from Zhoushan area (in Chinese). *Chin J Health Lab Tec* **2013**, *23*, (4), 971-972.
25. Zhang, Q.; Wu, F.; He, J.; Yu, X.; Wang, J., Analysis of methylmercury contamination in major seafoods from Zhoushan Fishery (in Chinese). *J. Environ Occup Med* **2011**, *28*, (5), 293-297.
26. Wang, J.; Tong, Z.; Yan, J., Study on the relationship between contents of poison in fishes and the levels of ocean pollutants in Zhoushan Fishery (in Chinese). *Chin J Epidemiol* **2005**, *26*, (1), 18-21.
27. Fang, J.; Wang, K. X.; Tang, J. L.; Wang, Y. M.; Ren, S. J.; Wu, H. Y.; Wang, J., Copper, lead, zinc, cadmium, mercury, and arsenic in marine products of commerce from Zhejiang coastal area, China, May 1998. *Bulletin of Environmental Contamination and Toxicology* **2004**, *73*, (3), 583-590.
28. Chen, Y. C.; Chen, M. H., Mercury levels of seafood commonly consumed in Taiwan. *Journal of Food and Drug Analysis* **2006**, *14*, (4), 373-378.
29. Fang, G. C.; Nam, D. H.; Basu, N., Mercury and selenium content of Taiwanese seafood. *Food Additives & Contaminants Part B-Surveillance* **2011**, *4*, (3), 212-217.
30. Ding, Q.; Liu, X., An investigation of total mercury and methylmercury in fish in Suzhou Area (in Chinese). *Suzhou University Journal of Medical Science* **1984**, (1), 55-55.
31. Liu, J.; Xu, X.; Chen, L.; Su, Y.; Wang, S.; Peng, J.; He, Q., Mercury and methylmercury contamination in fish from Yongxing Island and human health risk evaluation (in Chinese). *Marine environmental science* **2013**, *32*, (6), 867-870.
32. Zhu, A. J.; Zhang, W.; Xu, Z. Z.; Huang, L. M.; Wang, W. X., Methylmercury in fish from the South China Sea: Geographical distribution and biomagnification. *Marine Pollution Bulletin* **2013**, *77*, (1-2), 437-444.
33. Arima, S.; Shimada, K.; Uchiyama, M.; Hidaka, M., Total mercury contents in marine fishes caught in the south-east region of the South China Sea. *Mem. Fac. Fish. Kagoshima Univ.* **1989**, *38*, 63-67.
34. Pan, K.; Chan, H.; Tam, Y. K.; Wang, W.-X., Low mercury levels in marine fish from estuarine and coastal environments in southern China. *Environmental Pollution* **2014**, *185*, (0), 250-257.
35. Cheung, K. C.; Leung, H. M.; Wong, M. H., Metal concentrations of common freshwater and marine fish from the Pearl River Delta, South China. *Archives of Environmental Contamination and Toxicology* **2008**, *54*, (4), 705-715.
36. Wang, Z. H.; Lin, Q.; Wang, X. N.; Yang, M. L., Analysis of heavy metal contents in marine organisms from Daya Bay (in Chinese). *South China Fisheries Science* **2009**, *5*, (1), 23-28.
37. Yan, J. Y.; Huang, Y. L., Investigation on mercury contamination in freshwater fish in Jiangmen city (in Chinese). *Food Science* **1993**, *165*, (9), 53-53.
38. Yang, M. L.; Lin, Q.; Wang, Z. H.; Zhou, G. J., Analysis on the content and variation trend of heavy metal in the marine organisms in Daya Bay (in Chinese). *Marine environmental science* **2004**, *23*, (1), 41-44.
39. Qiu, Y.; Yan, W.; Wang, Z. D.; Zhang, G., Distribution of heavy metals in seawater, sediments and organisms at Daya Bay and their ecological harm (In Chinese). *J. Tropical oceanography* **2005**, *24*, (5), 69-76.
40. Zhu, X. H., Survey of contamination of foods with mercury in Jiangmen City (in Chinese). *China Tropical Medicine* **2010**, *10*, (2), 248-249.
41. Jiang, J.; Zhang, H. M.; Lin, K.; Li, X. H.; Qiu, H. M.; Shen, Z. G., Assessment of lead, cadmium and mercury pollution in aquatic product in Shenzhen (in Chinese). *J Hygiene Research* **2011**, *40*, (4), 527-528.
42. Huang, H.; Xu, Y.; Wang, L.; Bai, Y.; Zhang, S.; Zhang, C.; Huang, B., Monitoring of mercury cadmium lead, arsenic contamination in aquatic products in Zhuhai city (in Chinese) *China Public Health* **1998**, *14*, (1), 23-24.
43. Zhou, Y.; Yuan, P.; Guo, W. Z.; Wang, Y. L.; Wang, W. F.; Tang, J.; Li, X. D., Survey on pollution state of heavy metal in

- Hengyang City farmers market animal food (in Chinese). *Studies of Trace Elements and Health* **2011**, *28*, (2), 24-27.
44. Liang, P., Mercury in consumer aquatic production and human exposure of mercury via aquatic production consumption in Guangdong province (in Chinese). Master Dissertation of Southwest University. **2008**.
45. Deng, L.; Lin, S. Z.; Zhang, H. M., Heavy metals in marine mollusks, crustaceans and fish from the Shenzhen coastal region. *Progress in Environmental Science and Technology* **2009**, *II*, 142-146.
46. Li, P.; Feng, X. B.; Liang, P.; Chan, H. M.; Yan, H. Y.; Chen, L. G., Mercury in the seafood and human exposure in coastal area of Guangdong province, South China. *Environmental Toxicology and Chemistry* **2013**, *32*, (3), 541-547.
47. Zhang, L.; Liu, Y.; Ding, Z. H.; Yuan, Y. T.; Hu, Z. Z.; Wang, W. Q.; Wang, M., Mercury concentration and biological quality index of major fish species from Dongzhai mangrove forest area of Hainan (in Chinese). *Chinese Journal of Ecology* **2005**, *30*, (5), 1008-1012.
48. He, T. R.; Feng, X. B.; Guo, Y. N.; Qiu, G. L.; Li, Z. G.; Liang, L.; Lu, J. L., The impact of eutrophication on the biogeochemical cycling of mercury species in a reservoir: A case study from Hongfeng Reservoir, Guizhou, China. *Environmental Pollution* **2008**, *154*, (1), 56-67.
49. He, T.; Feng, X.; Guo, Y.; Qiu, G.; Yan, H.; Meng, B., Distribution and speciation of mercury in the Hongfeng Reservoir, Guizhou Province, China. *Chinese Journal of Geochemistry* **2008**, *27*, (1), 97-103.
50. Shi, S. F., Preliminary analysis of pollutant-containing residues in Hongfeng Lake (in Chinese). *Guizhou Agricultural Sciences* **1981**, (6), 52-54.
51. Liu, B.; Yan, H. Y.; Wang, C. P.; Li, Q. H.; Guedron, S.; Spangenberg, J. E.; Feng, X. B.; Dominik, J., Insights into low fish mercury bioaccumulation in a mercury-contaminated reservoir, Guizhou, China. *Environmental Pollution* **2012**, *160*, 109-117.
52. Yan, H. Y.; Feng, X. B.; Liu, T.; Shang, L. H.; Li, Z. G.; Li, G. H., Present situation of fish mercury pollution in heavily mercury-contaminated Baihua reservoir in Guizhou (in Chinese). *Chinese Journal of Ecology* **2008**, *27*, (8), 1357-1361.
53. Yan, H.; Feng, X.; Jiang, H.; Qiu, G.; Li, G.; Shang, L., The concentrations and distribution of mercury in aquatic ecosystem of Baihua Reservoir. *Chinese Journal of Geochemistry* **2005**, *24*, (4), 377-381.
54. Qiu, G. L.; Feng, X. B.; Wang, S. F.; Fu, X. W.; Shang, L. H., Mercury distribution and speciation in water and fish from abandoned Hg mines in Wanshan, Guizhou province, China. *Science of the Total Environment* **2009**, *407*, (18), 5162-5168.
55. Zhang, P. Q.; Chen, C. Y.; Zhao, J. J.; Li, B.; Qu, L.; Cai, Z. F., Correlation of Mercury, Selenium and Other Elements in the Tissues of Fishes from the Regions at Different Mercury Exposure Level (in Chinese). *Environ Sci* **2004**, *25*, (4), 149-153.
56. Lu, W. X., A study on the environmental health issues in mercury mine area in Eastern Guizhou- Western Hunan (in Chinese). *Northwestern Geology* **2003**, *36*, 146-148.
57. Cui, R. P., Biological monitoring of environmental mercury pollution (in Chinese). *Guizhou Environmental Protection Science and Technology* **1997**, *3*, (2), 37-38.
58. Ji, X. L.; Hu, W. X.; Cheng, J. P.; Yuan, T.; Xu, F.; Qu, L. Y.; Wang, W. H., Oxidative stress on domestic ducks (Shaoxing duck) chronically exposed in a Mercury-Selenium coexisting mining area in China. *Ecotoxicology and Environmental Safety* **2006**, *64*, (2), 171-177.
59. Cui, R. P.; Ma, X., L.; Man, H. S.; Yao, B. J.; Gu, W. X.; Xia, Q. F., Hazards of mercury pollution in food chain (in Chinese). *Environmental Science & Technology* **1983**, *4*, (2), 14-17.
60. Cui, R. P., An investigation of mercury pollution in Jinjiang River (in Chinese). *Environmental Protection and Technology* **1991**, (1), 1-16.
61. Yao, H.; Feng, X.; Yan, H.; Qiu, G.; Shang, L.; Shi, W., Mercury concentration in fish body in Hongfeng Reservoir of Guizhou Province. *Chinese Journal of ecology* **2010**, *29*, (67), 1155-1160.
62. Li, S. X.; Zhou, L. F.; Wang, H. J.; Xiong, M. H.; Yang, Z.; Hu, J. X.; Liang, Y. G.; Chang, J. B., Short-term impact of reservoir impoundment on the patterns of mercury distribution in a subtropical aquatic ecosystem, Wujiang River, southwest China. *Environmental Science and Pollution Research* **2013**, *20*, (7), 4396-4404.
63. Yao, H.; Feng, X. B.; Guo, Y. N.; Yan, H. Y.; Fu, X. W.; Li, Z. G.; Meng, B., MERCURY AND METHYLMERCURY CONCENTRATIONS IN TWO NEWLY CONSTRUCTED RESERVOIRS IN THE WUJIANG RIVER, GUIZHOU, CHINA. *Environmental Toxicology and Chemistry*

2011, 30, (3), 530-537.

64. Li, S. X.; Zhou, L. F.; Wang, H. J.; Liang, Y. G.; Hu, J. X.; Chang, J. B., Feeding habits and habitats preferences affecting mercury bioaccumulation in 37 subtropical fish species from Wujiang River, China. *Ecotoxicology* **2009**, *18*, (2), 204-210.
65. Wen, Y. F., An investigating study on mercury content of the river section from Yanhe to Pengshui, lower reaches of Wujiang River (in Chinese) *Sichuan Environment* **1994**, *13*, (4), 53-54.
66. Wang, P. J.; Gu, Y. H., The developing Trend of mercury in water body after building the reservoir on the upstream of Wujiang River (in Chinese). *Journal of Guizhou Normal University(Natural Sciences)* **1991**, *17*, (2), 22-27.
67. Fan, Y. K., A preliminary study of impact of mercury on fish in Wujiang River in the upper reaches of the Wujiang River (in Chinese). *Environmental Protection and Technology* **1991**, (2), 32-35.
68. Zhang, M.; Wang, A.; Zhao, X.; Chen, W., The research of methyl mercury chloride aquatic living beings (in Chinese). *Guizhou Science* **1991**, *9*, (2), 155-159.
69. Gu, Y. H.; Xiao, C. W.; Li, D. H., A preliminary study on mercury content of fishes in middle-upper reaches of Wujiang River. *China Environ Sci.* **1998**, *18*, (6), 544-547.
70. Li, T. H., Investigation and Forecast on the Waterbody mercury in upper Wujiang River with cold-vapour atomic absorption spectrometry (in Chinese). *J. Guizhou Institute of Technology* **1991**, *20*, (4), 60-66.
71. Yan, H. Y.; Rustadbakken, A.; Yao, H.; Larssen, T.; Feng, X. B.; Liu, T.; Shang, L. H.; Haugen, T. O., Total mercury in wild fish in Guizhou reservoirs, China. *Journal of Environmental Sciences-China* **2010**, *22*, (8), 1129-1136.
72. S.N., Z.; Cai, Y. Q., Investigation on the contamination of the aquatic products by methylmercury compounds in fifteen provinces and cities and prelliminary study on the sanitary standard of these compounds(in Chinese). *China Public Health* **1986**, *5*, (2), 7-9.
73. He, T. R.; Wu, Y. Y.; Pan, L. S.; Feng, X. B., Distribution of Mercury Species and Their Concentrations in Fish in Hongfeng Reservoir (in Chinese). *J Southwest University (Natural Science Edition)* **2010**, *32*, (7), 78-82.
74. Wang, P. J.; Gu, Y. H.; Li, D. H., The Discussion on the state of mercury in water body in Baihua lake reservoir (in Chinese). *J. Guizhou Normal Univ(Natural Science)* **1992**, *10*, (2), 29-32.
75. Horvat, M.; Nolde, N.; Fajon, V.; Jereb, V.; Logar, M.; Lojen, S.; Jacimovic, R.; Falnoga, I.; Liya, Q.; Faganeli, J.; Drobne, D., Total mercury, methylmercury and selenium in mercury polluted areas in the province Guizhou, China. *Science of the Total Environment* **2003**, *304*, (1-3), 231-256.
76. Yu, Y.; Wang, Y. C.; Zhou, H. D.; Gao, B.; Zhao, G. F., Biomagnification of Heavy Metals in the Aquatic Food Chain in Daning River of the Three Gorges Reservoir During Initial Impoundment (in Chinese). *Environmental Since* **2013**, *34*, (10), 3847-3853.
77. Yu, Y.; Wang, Y. C.; Zhou, H. D.; Gao, B.; Zhao, G. F., Mercury Reservoir contents in fish and its biomagnification in the food web in Three Gorges after 175m impoundment (in Chinese). *Acta Ecologica Sinica* **2013**, *33*, (13), 4059-4067.
78. Yu, Y.; Wang, Y. C.; Gao, B.; Hong, Y.; Wan, X.; Zhou, H., 2012. Assessment on pollution risk of mercury in fishes of Three Gorges Reservoir after 175m impoundment. *Resources and Environment in the Yangtze Basin*. 21(5):547-551. **2012**.
79. Zhang, L.; Zang, X.; Xu, J.; Xie, P.; Zhu, Z.; Su, J., Mercury bioaccumulation in fishes of Three Gorges Reservoir after impoundment. *Bulletin of Environmental Contamination and Toxicology* **2007**, *78*, (3-4), 262-264.
80. Wang, W. Y., Investigation of heavy metal content in fish at Chongqing section of the Yangtze River before water s storage in the Three Gorges Reservoir (in Chinese) *Water Resources Protection*. 24(5):34-37 **2008**, *24*, (5), 34-37.
81. Qi, J.; Fu, C.; Huang, X.; Tan, J., Transfer of trace elements in water area ecology system of the Three Gorges Reserves (in Chinese) *J Chongqin University (Natural Science Edition)* **2002**, *25*, (1), 17-20.
82. Xu, X. Q.; Zhang, X. H.; Jin, L. J.; Qiu, C. Q., Effect of mercury reactivity on fish mercury contents in the Three-Gorge Reservoir after impoundment (in Chinese). *Resources and Environment in the Yangtze Basin* **1999**, *8*, (2), 198-204.
83. Xu, X. Q.; Qiu, C. Q.; Deng, G. Q.; Hui, J. Y.; Jin, L. J.; Zhang, X. H., Characteristics of element contents in carp (*Cyprinus carpio* L.) from the Changjiang River (in Chinese). *Resources and Environment in the Yangtze Basin* **1998**, *7*, (3), 267-273.
84. Jin, L. J.; Xu, X. Q., Methylmercury distribution in surface water and fish in the Three-Gorge Reservoir Area (in Chinese) *Resources and Environment in the Yangtze Valley* **1997**, *6*, (4), 324-328.

85. Xu, X. Q.; Qiu, C. Q.; Deng, G. Q.; Hui, J. Y.; Zhang, X. H., Chemical-ecological effects of mercury pollution in the Three Gorge Reservoir Area (in Chinese) *Acta Hydrobiologica Sinica* **1999**, *23*, (3), 197-202.
86. Xiong, D. G.; Liao, J., Mercury in the Environment of Sichuan Province (in Chinese). *Sichuan Environment* **1994**, *13*, (1), 46-49.
87. Cai, S.; Ni, Z.; Li, Y.; Shen, Z.; Xiong, Z.; Zhang, Y.; Zhou, Y., Metals in the Tissues of Two Fish Species from the Rare and Endemic Fish Nature Reserve in the Upper Reaches of the Yangtze River, China. *Bulletin of Environmental Contamination and Toxicology* **2012**, *88*, (6), 922-7.
88. Cai, S.; Ni, C.; Li, Y.; Shen, Z.; Zhang, Y.; Zhou, Y., Heavy metal residues in the muscle of fishes from the rare and endemic fishes national nature reserve in the upper reaches of the Yangtze River, China (in Chinese). *J Fishery Sci. China* **2011**, *18*, (6), 1351-1357.
89. Wang, Y., Study on toxic heavy metals (Hg, As) in Jialing River (in Chinese). Master Dissertation, Southwest University. **2008**.
90. Shang, X. H.; Li, X. W.; Zhang, L.; Zhao, Y. F.; Wu, Y. N., Estimation of methylmercury intake from the 2007 Chinese Total Diet Study. *Food Additives & Contaminants Part B-Surveillance* **2010**, *3*, (4), 236-245.
91. Shao, L. J., Mercury pollution and security of the sideline aquatic products in suburb of Chengdu (in Chinese). Master Dissertation, Chengdu University of Technology **2010**.
92. Zhang, Z.; He, L.; Li, J.; Wu, Z. B., Analysis Of Heavy Metals Of Muscle And Intestine Tissue In Fish - In Banan Section Of Chongqing From Three Gorges Reservoir, China. *Polish J. of Environ. Stud.* **2007**, *16*, (6), 949-958.
93. Xu, X. Q.; Qiu, C. Q.; Deng, G. Q.; Hui, J. Y.; Zhang, X. H., Prediction of fish mercury bioaccumulation in reservoirs (in Chinese). *Acta Hydrobiologica Sinica* **1998**, *22*, (3), 244-250.
94. Zheng, L.; Li, W.; Li, Y., Analysis and Evaluation of Heavy Metal Pollution in fish in Xiangjiang River (Changsha section) (in Chinese) *Light Industry Science and Technology* **2012**, (9), 94-95.
95. Yang, Z., Analysis of mercury pollution condition in foods in Changsha in 2011 (in Chinese). *Chinese Journal of Health Laboratory Technology* **2013**, *23*, (4), 935-936.
96. Fu, Z. Y.; Wu, F. C.; Mo, C. L.; Liu, B. J.; Zhu, J.; Deng, Q. J.; Liao, H. Q.; Zhang, Y. S., Bioaccumulation of antimony, arsenic, and mercury in the vicinities of a large antimony mine, China. *Microchemical Journal* **2011**, *97*, (1), 12-19.
97. Su, Q.; Qi, S. H.; Jiang, J.; Ma, Z.; Wu, Z.; Ni, Q., Environmental geochemistry assessment of mercury from lakes in Wuhan city, Hubei, China. *Geochimica* **2006**, *35*, (3), 221-226.
98. Hui, Y.; Xu, Y.; Tang, Q. H.; Wang, W. H., Correlation between mercury concentrations in surface sediment and fish muscle in Ya- Er Lake, Hubei (in Chinese). *J. Safety and Environment* **2005**, *5*, (1), 9-11.
99. Jin, L. N.; Liang, L. N.; Jiang, G. B.; Xu, Y., Methylmercury, total mercury and total selenium in four common freshwater fish species from Ya-Er Lake, China. *Environmental Geochemistry and Health* **2006**, *28*, (5), 401-407.
100. Chen, S.; Hu, G.; Li, Y.; Chen, B.; Zhang, Y.; Liu, W., Heavy metal content pollution investigation and evaluation of organisms in Jiangsu block of Changjiang River (in Chinese). *Jiangsu Geology* **2007**, *31*, (3), 223.
101. Cai, M. P., Environmental impacts of Rubber dam on Zhangjiang River (in Chinese). Master dissertation, Jiangxi University of Science and Technology. **2012**.
102. Yi, Y. J.; Zhang, S. H., The relationships between fish heavy metal concentrations and fish size in the upper and middle reach of Yangtze River. *Procedia Environmental Sciences* **2012**, *13*, (0), 1699-1707.
103. Yi, Y. J.; Yang, Z. F.; Zhang, S. H., Ecological risk assessment of heavy metals in sediment and human health risk assessment of heavy metals in fishes in the middle and lower reaches of the Yangtze River basin. *Environmental Pollution* **2011**, *159*, (10), 2575-2585.
104. Yi, Y. J.; Zhang, S. H., Heavy metal (Cd, Cr, Cu, Hg, Pb, Zn) concentrations in seven fish species in relation to fish size and location along the Yangtze River. *Environmental Science and Pollution Research* **2012**, *19*, (9), 3989-3996.
105. Suo, Q.; Mao, Y.; Zhang, F.; Cui, Y., Mercury contents in the muscle tissue of fish species in Xiaolangdi Reservoir. *Environmental Chemistry*. 32(11):2030-2036. *Environmental Chemistry* **2013**, *32*, (11), 2030-2036.
106. Qun, M. P.; Wang, Y. L.; Cui, G. T., Determination and Evaluation of Heavy Metals in aquatic products in Luoyang river .. *Shaanxi Journal of Agricultural Sciences* **2010**, (3), 36-38.

107. Zhang, H. Y.; Ni, Z. C.; Li, Y. N., Determination of water and fish mercury in ponds of Yinchuan area. . *J. Ningxia Medical College* **1997**, *19*, (4), 11-13.
108. Zhang, P. Q.; Chen, G.; Zhang, B. H., An investigation on mercury pollution in fish, poultry and fishermen hair in Qingtongxia Reservoir (in Chinese). *Journal of Environment and Health* **1988**, *5*, (6), 29-30.
109. Zhang, P. Q., Variation tendency and impact of mercury pollution of economic fishes of Huanghe River (Ningxia Section) in 1980s (in Chinese). *Arid Environmental Monitoring* **1993**, *7*, (4), 234-239.
110. Yang, Y. H.; Wu, H. L.; Zhang, S. Y.; Zhang, J. N.; Wang, L. Z.; Wang, L. X.; Li, W. P., Characteristics of heavy metal and organochlorine pollution in the muscle of *Silurus lanzhouensis* living in the Yellow River (in Chinese). *Journal of Northwest A&F University (Nat Sci Ed)* **2011**, *39*, (12), 67-74.
111. Cui, B. S.; Zhang, Q. J.; Zhang, K. J.; Liu, X. H.; Zhang, H. G., Analyzing trophic transfer of heavy metals for food webs in the newly-formed wetlands of the Yellow River Delta, China. *Environmental Pollution* **2011**, *159*, (5), 1297-1306.
112. Zhang, Y. M.; Qi, X. R.; Zhao, Q. G.; Liu, J. C., Determination of Fish, Pork, Egg and Milk Mercury Contents in Cities and Counties of Shaanxi Province. Determination of Fish, Pork, Egg and Milk Mercury Contents in Cities and Counties of Shaanxi Province (in Chinese). *Acta Univ. Agric. Boreali-occidentalis* **1997**, *25*, (2), 61-65.
113. Fu, Z. Y.; Wu, F. C.; Amarasiriwardena, D.; Mo, C. L.; Liu, B. J.; Zhu, J.; Deng, Q. J.; Liao, H. D., Antimony, arsenic and mercury in the aquatic environment and fish in a large antimony mining area in Hunan, China. *Science of the Total Environment* **2010**, *408*, (16), 3403-3410.
114. Song, Z. R.; Gao, L. W.; Xu, Z. C.; Feng, Z. T.; Lei, Z. Y., Epidemiological studies of mercury pollution health effects in the Songhua River area (in Chinese). *Journal of Environment and Health* **1987**, *4*, (6), 6-10.
115. Li, Z. P.; Lei, L.; Cheng, Y., Research on Methylmercury in Fish Bodies in Harbin part of Songhua River and its Analyzed Method (in Chinese). *Heilongjiang Environmental Journal* **2001**, *25*, (2), 69-72.
116. Feng, D.; Ma, J.; Bai, Y.; Xu, D., Research on Mercury Pollution of Fishes in Harbin Songhua River (in Chinese) *Heilongjiang Environmental Journal* **2004**, *28*, (2), 53-55.
117. Lu, L.; Chen, H., Analysis of Mercury contents in some fishes from the Songhua River (in Chinese). *9* **2000**, *4*, (359-361).
118. Liu, Y.; Su, H.; Liu, W., Study on Enrichment of Songhua River Methyl Mercury in Fish Bodies & Its Affecting Factors (in Chinese). *DHPS* **2004**, *20*, (1), 63-66.
119. Qi, S. H., Environmental background value of mercury in water body of the Songhua River Basin (in Chinese). *Scientific Geographica Sinica* **1987**, *7*, (3), 273-279.
120. Sun, W.; Yu, H.; Li, Y., Monitoring and Pollution Assessment of Heavy Metals in Fishes of Songhua River (in Chinese). *South-to-North Transfers and Water Science & Technology* **2013**, *11*, (5), 33-33.
121. Qin, L.; Mou, Z. B.; Zhao, J.; Chen, Z. X.; Jiang, Q., Assessment on Mercury Pollution Status of Fishery Ecological Environment in Songhua River (in Chinese) *Environmental Protection Sciences* **2011**, *37*, (1), 66-69.
122. Yu, C. R.; Wang, W.; Liang, D.; Cao, Z.; He, Y., A Study on the population characteristics of total mercury and methylmercury in Songhua River (in Chinese). *J. Changchun Univ. of Earth Sciences* **1994**, *24*, (1), 102-109.
123. Wang, X.; Guang, L.; Cui, Q.; Wang, F.; Shen, Y., Epidemiological studies of chronic methylmercury poisoning residents along the Songhua River (in Chinese) *Chinese J Public Health* **1993**, *12*, (4), 208-210.
124. Yu, C. R.; Liang, D.; Cao, L.; He, Y., Study on the total mercury and methylmercury in fish from the Songhua River (in Chinese). *Environmental Science* **1994**, *15*, (4), 35-40.
125. Lu, Y.; Yan, B.; Li, H.; Wang, M.; Guo, L., The evolution rule and ecology risk assessment of mercury in fish of Songhua River. *J Agro-Environmental Science* **2008**, *27*, (6), 2430-2433.
126. Lu, Y.; Zhai, P.; Chen, H.; Zhan, P. R., Residue levels of mercury in fishes of the Songhua River (in Chinese). *Chin J Fisheries* **1999**, *12*, (2), 74-80.
127. Zhu, H.; Yan, B.; Zhang, F., Enrichment of heavy metals in fishes of Songhua River and its pollution assessment (in Chinese). *Journal of Ecology and Rural Environment* **2010**, *26*, (5), 492-496.
128. Qin, D. L.; Chen, Z. X.; Wang, H. T.; Zhao, J. W.; Mou, Z. B., Determination of Total Mercury in Fish from Amur and Ussuri

- River of China by Microwave Digestion-ICP/MS Method. *Asian Journal of Chemistry* **2013**, *25*, (7), 3665-3667.
129. Lu, Y. S.; Shang, F. Q.; Luo, F. P., An investigation of mercury residues in fish from Songhuajiang River (in Chinese). *Heilongjiang Fisheries* **2000**, (3), 1-5.
130. Lei, P.; Zhang, Y.; Lei, Y.; Xu, X., The distribution rule of mercury content in the body of freshwater fishes of Suifenhe region (in Chinese). *Honglongjiang Animal Science and Veterinary Medicine* **2014**, (6), 16-20.
131. Wang, Q.; Zhang, Z.; Zhou, X.; Lu, X., Mercury distribution and accumulation in typical wetland ecosystems of Sanjiang Plain, Northeast China. *Chinese Geographical Science* **2013**, *23*, (1), 49-58.
132. Qin, D. L.; Zhan, P. R.; Sun, D. J.; Sun, P.; Wang, F., Environmental Mercury Contamination Monitoring by Using Freshwater Fishes (in Chinese) *J Environ Health* **2009**, *26*, (2), 132-134.
133. Qin, D. L.; Zhan, P. R.; Sun, P.; Wang, F., Research on monitoring mercury contamination in water environment by crucian carp, *Carassius auratus* (in Chinese). *Fishery Modernization* **2008**, *35*, (4), 16-19.
134. Yang, H. S.; Liu, Z. X., Total mercury survey in fish of aquarium in Mudanjiang City (in Chinese). *Meat Hygiene* **2000**, *196*, (10), 12-13.
135. Liu, Q.; fU, G. W., A Research of Pollution Situation of Hg in the Yalu River Estuary and its Control Countermeasures. . *Urban Environment & Urban Ecology* **1999**, *12*, (5), 26-28.
136. Zhu, J.; Liu, M.; Yang, X.; Yang, H., Research on CymeneHydrargyrum in Fish Bodies in Yi tong River and Its Analyzed Method (in Chinese) *Journal of Changchun University of Science and Technology (Natural Science Edition)* **2007**, *30*, (4), 97-99.
137. Lei, J.; Yuan, H. X.; Ma, C.; Li, P.; Zheng, M.; Chen, G., An Investigation on mercury pollution of fish in Changchun farm market with atomic absorption spectrophotometry (in Chinese). *Bulletin of Veterinary college of PLA* **1988**, *8*, (2), 190-196.
138. Zhang, L.; Wang, Q. C.; Shao, Z. G., Mercury contamination of fish in the Di'er Songhua River of China: the present station and evolution law (in Chinese). *Ecology and Environment* **2005**, *14*, (2), 190-194.
139. Yu, C. R.; Wang, W.; Jin, Q. B.; Wan, S. Y., On the mercury pollution of the fish in the middle and lower reaches of the second Songhua River (in Chinese). *Acta Zoologica Sinica* **1983**, *29*, (4), 371-382.
140. Zhang, Z. S.; Sun, X. J.; Wang, Q. C.; Zheng, D. M.; Zheng, N.; Lv, X. G., Recovery from Mercury Contamination in the Second Songhua River, China. *Water, Air and Soil Pollution* **2010**, *211*, (1-4), 219-229.
141. Zhu, H.; Yan, B.; Cao, H.; Wang, L., Risk assessment for methylmercury in fish from the Songhua River, China: 30 years after mercury-containing wastewater outfalls were eliminated. *Environmental Monitoring and Assessment* **2012**, *184*, (1), 77-88.
142. Li, Z. B.; Wang, Q. C.; Luo, Y. M., Exposure of the urban population to mercury in Changchun city, Northeast China. *Environmental Geochemistry and Health* **2006**, *28*, (1-2), 61-66.
143. Zhu, L.; Yan, B.; Wang, L.; Pan, X., Mercury concentration in the muscle of seven fish species from Chagan Lake, Northeast China. *Environmental Monitoring and Assessment* **2012**, *184*, (3), 1299-310.
144. Zhao, H. Y.; Xu, X. L.; Qu, Z. Y., Detection of Mercury in the Body of Freshwater Fish in the Region of Jinzhou (in Chinese). *Modern Fisheries Information* **2009**, *24*, (1), 23-34.
145. Luo, W.; Wang, T.; Jiao, W.; Hu, W.; Naile, J. E.; Khim, J. S.; Giesy, J. P.; Lu, Y., Mercury in coastal watersheds along the Chinese Northern Bohai and Yellow Seas. *Journal of Hazardous Materials* **2012**, *215-216*, (0), 199-207.
146. Wang, S. F.; Li, B.; Zhang, M. M.; Xing, D. H.; Jia, Y. F.; Wei, C. Y., Bioaccumulation and trophic transfer of mercury in a food web from a large, shallow, hypereutrophic lake (Lake Taihu) in China. *Environmental Science and Pollution Research* **2012**, *19*, (7), 2820-2831.
147. Hao, Y.; Chen, L.; Zhang, X. L.; Zhang, D. P.; Zhang, X. Y.; Yu, Y. X.; Fu, J. M., Trace elements in fish from Taihu Lake, China: Levels, associated risks, and trophic transfer. *Ecotoxicology and Environmental Safety* **2013**, *90*, 89-97.
148. Ding, W. W., Study on the level of mercury in aquatic foods in Suzhou area and investigation on mercury intake of Suzhou residents (in Chinese). Master Dissertation, Suzhou University. **2007**.
149. Fan, L.; Fu, C.; Ding, W., Analysis of Total Mercury in Aquatic Vegetables Cultivated in Suzhou and Aquatic Products in Taihu Lake. *Food Science* **2012**, *33*, (12), 273-275.
150. Dai, Q.; Zhang, Y.; Gao, L.; Zhuang, D., Metal element contents in commercial freshwater fishes from lakes of different

- trophic types in Suzhou Region (in Chinese). *Acta Hydrobiologica Sinica* **1990**, *14*, (2), 97-107.
151. Liu, Y.; Lei, H.; Guo, J.; Chen, M.; Su, H., Correlation among the contents in five kinds of freshwater fish, fish intake, mercury in cord blood and in fetal hair in Wujiang. *Journal of Soochow University Medical Science Edition* **2011**, *31*, (5), 751-754.
152. Zhu, W. Y., The bioaccumulation of heavy metals in the freshwater animals and the toxic effect of them on the hepatopancreas of *Macrobrachium rosenbergi* (in Chinese). Master Dissertation, Shanghai Normal University. **2003**.
153. Lei, B. L.; Chen, L.; Hao, Y.; Cao, T. H.; Zhang, X. Y.; Yu, Y. X.; Fu, J. M., Trace elements in animal-based food from Shanghai markets and associated human daily intake and uptake estimation considering bioaccessibility. *Ecotoxicology and Environmental Safety* **2013**, *96*, 160-167.
154. Wang, F. F., Determination of mercury content in the esculent fresh water fishes (in Chinese). *The food industry* **2007**, (4), 50-52.
155. Shi, K. J.; Liu, J.; Ma, L. J., Investigation and evaluation of lead, cadmium, arsenic, mercury in aquatic products of Nansihu Lake in Shandong (in Chinese). *Food and Drug* **2006**, *8*, (7), 59-61.
156. Dai, F. F.; Qu, N.; Wang, H.; Nie, D. D., Investigation on heavy metal contamination in commercial food in Weifang city in 2010 (in Chinese). *Occup and Health* **2011**, *27*, (8), 886-887.
157. Zhang, L., A Study on Mercury Contamination in Fish from Qingdao City (in Chinese). *Chinese Agricultural Science Bulletin* **2009**, *25*, (3), 293-296.
158. Liu, Y. M., Sources and preventive measures of mercury in fish in Andi reservoir (in Chinese). *Shandong Environment* **1999**, *93*, (5), 53-54.
159. Chen, X. K.; Xu, C. H., Mercury Residues Investigation of Exported Freshwater Fish in Lianyungang City (in Chinese) *Fisheries Science* **2004**, *23*, (2), 33-34.
160. Sun, J.; Chen, C. Y.; Li, B.; Li, Y. F.; Wang, J. X.; Gao, Y. X.; Cai, Z. F., Analysis of total mercury and methylmercury concentrations in four commercially important freshwater fish species obtained from Beijing markets (in Chinese). *J. Hygiene research* **2006**, *35*, (6), 722-725.
161. Chen, C. Y.; Pickhardt, P. C.; Xu, M. Q.; Folt, C. L., Mercury and arsenic bioaccumulation and eutrophication in Baiyangdian Lake, China. *Water Air and Soil Pollution* **2008**, *190*, (1-4), 115-127.
162. Fu, J. J.; Wang, Y. W.; Zhou, Q. F.; Jiang, G. B., Trophic transfer of mercury and methylmercury in an aquatic ecosystem impacted by municipal sewage effluents in Beijing, China. *Journal of Environmental Sciences-China* **2010**, *22*, (8), 1189-1194.
163. Tong, Y. D.; Guo, M.; Hu, D.; Ou, L. B.; wEl, W.; Zhang, W.; Wang, X. J., Analysis and risk assessment of total mercury and methylmercury in aquatic products in Beijing market (in Chinese). *Ecology and Environmental science* **2010**, *19*, (9), 2187-2191.
164. Sun, B. Q., Biochemistry of mercury pollution-Survey of mercury content of fish in two fish farms (in Chinese). *Capital Normal Nniversity (Natural Science Edition)* **1984**, (2), 34-41.
165. Dong, K. Y.; Lin, C. Y.; Wang, B., The enrichment and residual law of mercury in four freshwater fish (in Chinese). *Beijing Agricultural Sciences* **1998**, *16*, (1), 21-23.
166. Wang, X. L.; Sato, T.; Xing, B. S.; Tao, S., Health risks of heavy metals to the general public in Tianjin, China via consumption of vegetables and fish. *Science of the Total Environment* **2005**, *350*, (1-3), 28-37.
167. Yang, X.; Wen, Y.; Chen, X.; Wang, W.; Fang, J., Heavy metal enrichment in Aquatic organisms of Beijing River: Its characteristics and pollution evaluation (in Chinese). *Environmental Sci Technology* **2010**, *23*, (6), 194-198.
168. Xie, W.; Chen, K.; Zhu, X.; Nie, X.; Zheng, G.; Pan, D.; Wang, S., Evaluation on heavy metal contents in water and fishes collected from the waterway in the Pearl River Delta, South China. . *Journal of Agro-Envrionment Science* **2010**, *29*, (10), 1917-1923.
169. Shao, D. D.; Kang, Y.; Cheng, Z.; Wang, H. S.; Huang, M. J.; Wu, S. C.; Chen, K. C.; Wong, M. H., Hair mercury levels and food consumption in residents from the Pearl River Delta: South China. *Food Chemistry* **2013**, *136*, (2), 682-688.
170. Shao, D. D.; Liang, P.; Kang, Y.; Wang, H. S.; Cheng, Z.; Wu, S. C.; Shi, J. B.; Lo, S. C. L.; Wang, W. X.; Wong, M. H., Mercury species of sediment and fish in freshwater fish ponds around the Pearl River Delta, PR China: Human health risk assessment. *Chemosphere* **2011**, *83*, (4), 443-448.

171. Zhou, H. Y.; Wong, M. H., Mercury accumulation in freshwater fish with emphasis on the dietary influence. *Water Research* **2000**, *34*, (17), 4234-4242.
172. Cheng, Z.; Liang, P.; Shao, D.-d.; Wu, S.-c.; Nie, X.-p.; Chen, K.-c.; Li, K.-b.; Wong, M.-h., Mercury Biomagnification in the Aquaculture Pond Ecosystem in the Pearl River Delta. *Archives of Environmental Contamination and Toxicology* **2011**, *61*, (3), 491-9.
173. Lin, D. M.; Wu, L. N.; Mai, J. M.; Zhang, Q.; Yang, F. R., Monitoring of the pollution of aquatic products in Panyu, Guangzhou in 2009-2011 (in Chinese). *J. Trop. Med.* **2012**, *12*, (9), 1150-1153.
174. Tian, W. J.; Chen, L. G.; Mo, C. H. X.; Xu, Z. C.; Fang, J. D.; Liang, M. Y.; Huang, Y. M., Concentrations and exposure risk assessment of methylmercury in regularly consumed fishes from Guangzhou Markets, China (in Chinese). *J Agro-Environmental Science* **2011**, *30*, (3), 416-421.
175. Li, M. Y.; Mo, G.; Chen, L.; Li, Y., Monitoring of chemical contaminants in food in Wuzhou in 2009-2010 (in Chinese). *Applied Prev Med* **2011**, *17*, (2), 99-101
176. Chung, S. W. C.; Kwong, K. P.; Tang, A. S. P.; Xiao, Y.; Ho, P. Y. Y., Mercury and methylmercury levels in the main traded fish species in Hong Kong. *Food Additives & Contaminants Part B-Surveillance* **2008**, *1*, (2), 106-113.
177. Dickman, M. D.; Leung, K. M. C., Mercury and organochlorine exposure from fish consumption in Hong Kong. *Chemosphere* **1998**, *37*, (5), 991-1015.
178. Liang, P.; Shao, D.-D.; Wu, S.-C.; Shi, J.-B.; Sun, X.-I.; Wu, F.-Y.; Lo, S. C. L.; Wang, W.-X.; Wong, M. H., The influence of mariculture on mercury distribution in sediments and fish around Hong Kong and adjacent mainland China waters. *Chemosphere* **2011**, *82*, (7), 1038-1043.
179. Yang, R.; Jing, C.; Zhang, Q.; Wang, Z.; Wang, Y.; Li, Y.; Jiang, G., Polybrominated diphenyl ethers (PBDEs) and mercury in fish from lakes of the Tibetan Plateau. *Chemosphere* **2011**, *83*, (6), 862-867.
180. Zhang, Q. G.; Pan, K.; Kang, S. C.; Zhu, A. J.; Wang, W. X., Mercury in Wild Fish from High-Altitude Aquatic Ecosystems in the Tibetan Plateau. *Environmental Science & Technology* **2014**, *48*, (9), 5220-5228.
181. Yang, R. Q.; Jing, C. Y.; Zhang, Q. H.; Jiang, G. B., Identifying semi-volatile contaminants in fish from Niyang River, Tibetan Plateau. *Environmental Earth Sciences* **2013**, *68*, (4), 1065-1072.
182. Yi, B. L. Y., A study on heavy metal pollution of some surface water bodies in Urumqi (in Chinese). Master dissertation, Xinjiang Medical University. **2004**.
183. Yan, L.; Guo, W.; Pan, Y.; Zhang, T.; Wang, X., An investigation of arsenic and mercury in fish and poultry in Urumqi (in Chinese). *Endemic Disease Bulletin* **2005**, *20*, (3), 25-26.
184. Li, J.; Zhang, L.; Bai, F. L., An investigation of total mercury and lead in commercially available fish in Shihezi City. *Reservoir Fisheries* **2007**, *27*, (5), 73-74.
185. Fang, T.; Aronson, K. J.; Campbell, L. M., Freshwater Fish-Consumption Relations With Total Hair Mercury and Selenium Among Women in Eastern China. *Archives of Environmental Contamination and Toxicology* **2012**, *62*, (2), 323-332.
186. Chien, L.-C.; Yeh, C.-Y.; Jiang, C.-B.; Hsu, C.-S.; Han, B.-C., Estimation of acceptable mercury intake from fish in Taiwan. *Chemosphere* **2007**, *67*, (1), 29-35.
187. Shao, D. D.; Wu, S. C.; Liang, P.; Kang, Y.; Fu, W. J.; Zhao, K. L.; Cao, Z. H.; Wong, M. H., A human health risk assessment of mercury species in soil and food around compact fluorescent lamp factories in Zhejiang Province, PR China. *Journal of Hazardous Materials* **2012**, *221-222*, (0), 28-34.
188. Ding, L. F., Investigation and assessment of heavy metal pollution in main agricultural product and environment of Changnan country (in Chinese). Master Dissertation, Zhejiang University. **2008**.
189. Cheng, J. P.; Gao, L. L.; Zhao, W. C.; Liu, X. J.; Sakamoto, M.; Wang, W. H., Mercury levels in fisherman and their household members in Zhoushan, China: Impact of public health. *Science of the Total Environment* **2009**, *407*, (8), 2625-2630.
190. Ha, L.; Bai, S. L.; Xiao, J. M., Investigation of Contents of Total Mercury in Fishes in the Huluea Lake, Inner Mongolia (in Chinese). *Environmental Science* **1990**, *11*, (1), 45-46.
191. Liu, F.; Ni, H. G.; Chen, F.; Luo, Z. X.; Shen, H. Q.; Liu, L. P.; Wu, P., Metal accumulation in the tissues of grass carps



- (Ctenopharyngodon idellus) from fresh water around a copper mine in Southeast China. *Environmental Monitoring and Assessment* **2012**, *184*, (7), 4289-4299.
192. Onsanit, S.; Wang, W. X., Sequestration of total and methyl mercury in different subcellular pools in marine caged fish. *Journal of Hazardous Materials* **2011**, *198*, 113-122.
193. Li, X. Z., 2008. Total mercury in the marine culture products and relative environmental samples from Sandu Bay of Fujian Province and its health risk assessment (in Chinese). *J. Fishery Sciences of China* **2008**, *15*, (6), 961-969.
194. Onsanit, S.; Chen, M.; Ke, C. H.; Wang, W. X., Mercury and stable isotope signatures in caged marine fish and fish feeds. *Journal of Hazardous Materials* **2012**, *203*, 13-21.
195. Luo, P.; Huang, Y.; Zhong, G.; Qiu, Y.; Wen, D., Analysis of chemical pollutant test result for food in Meizhou city in 2009 (in Chinese). *Occp and Health* **2010**, *26*, (20), 2322-2323.
196. Qiu, Y. W.; Lin, D. A.; Liu, J. Q.; Zeng, E. Y., Bioaccumulation of trace metals in farmed fish from South China and potential risk assessment. *Ecotoxicology and Environmental Safety* **2011**, *74*, (3), 284-293.
197. Yang, H.; Han, Y.; Huang, L., Survey of mercury contamination of food in some areas of China *J Hygiene Research* **1994**, *23*, (2), 95-96.
198. Xia, C. H.; Wu, X. G.; Lam, J. C. W.; Xie, Z. Q.; Lam, P. K. S., Methylmercury and trace elements in the marine fish from coasts of East China. *Journal of Environmental Science and Health Part a-Toxic/Hazardous Substances & Environmental Engineering* **2013**, *48*, (12), 1491-1501.
199. McKelvey, W.; Chang, M.; Arnason, J.; Jeffery, N.; Kricheff, J.; Kass, D., Mercury and polychlorinated biphenyls in Asian market fish: A response to results from mercury biomonitoring in New York City. *Environmental Research* **2010**, *110*, (7), 650-657.
200. Yang, H. F.; Luo, X. Y.; Shen, W.; Zhou, Z. F., National food contamination monitoring programmes-Levels of mercury, lead and cadmium in Chinese foods. *Biomedical and Environmental Sciences* **1994**, *7*, 362-368.
201. Du, Z. Y.; Zhang, J.; Wang, C. R.; Li, L. X.; Man, Q. Q.; Lundebye, A. K.; Froyland, L., Risk-benefit evaluation of fish from Chinese markets: Nutrients and contaminants in 24 fish species from five big cities and related assessment for human health. *Science of the Total Environment* **2012**, *416*, 187-199.
202. Fu, Z.; Wu, F.; Amarasiriwardena, D.; Mo, C.; Liu, B.; Zhu, J.; Deng, Q.; Liao, H., Antimony, arsenic and mercury in the aquatic environment and fish in a large antimony mining area in Hunan, China. *Science of the Total Environment* **2010**, *408*, (16), 3403-3410.
203. Liu, B.; Yan, H.; Wang, C.; Li, Q.; Guedron, S.; Spangenberg, J. E.; Feng, X.; Dominik, J., Insights into low fish mercury bioaccumulation in a mercury-contaminated reservoir, Guizhou, China. *Environmental Pollution* **2012**, *160*, 109-117.
204. Qiu, G.; Feng, X.; Jiang, G., Synthesis of current data for Hg in areas of geologic resource extraction contamination and aquatic systems in China. *Science of the Total Environment* **2012**, *421-422*, (0), 59-72.
205. Lin, Y.; Vogt, R.; Larssen, T., Environmental mercury in China: A review. *Environmental Toxicology and Chemistry* **2012**, *31*, (11), 2431-2444.
206. Han, F.; Shan, X. Q.; Zhang, S. Z.; Wen, B., Mercury speciation in China's coastal surface seawaters. *International Journal of Environmental Analytical Chemistry* **2004**, *84*, (8), 583-598.
207. Shi, H. B.; Liang, L. N.; Jiang, G. B.; Jin, X. L., The speciation and bioavailability of mercury in sediments of Haihe River, China. *Environment International* **2005**, *31*, (3), 357-365.
208. Ci, Z.; Zhang, X.; Wang, Z.; Niu, Z., Phase speciation of mercury (Hg) in coastal water of the Yellow Sea, China. *Marine Chemistry* **2011**, *126*, (1-4), 250-255.
209. Fu, X.; Feng, X.; Zhang, G.; Xu, W.; Li, X.; Yao, H.; Liang, P.; Li, J.; Sommar, J.; Yin, R.; Liu, N., Mercury in the marine boundary layer and seawater of the South China Sea: Concentrations, sea/air flux, and implication for land outflow. *Journal of Geophysical Research: Atmospheres* **2010**, *115*, (D6), D06303.
210. Wang, S. F.; Jia, Y. F.; Wang, S. Y.; Wang, X.; Wang, H.; Zhao, Z. X.; Liu, B. Z., Total mercury and monomethylmercury in water, sediments, and hydrophytes from the rivers, estuary, and bay along the Bohai Sea coast, northeastern China. *Applied Geochemistry* **2009**, *24*, (9), 1702-1711.

211. Zheng, W.; Kang, S.; Feng, X.; Zhang, Q.; Li, C., Mercury speciation and spatial distribution in surface waters of the Yarlung Zangbo River, Tibet. *Chin. Sci. Bull.* **2010**, *55*, (24), 2697-2703.
212. Meng, B.; Feng, X. B.; Chen, C. X.; Qiu, G. L.; Sommar, J.; Guo, Y. N.; Liang, P.; Wan, Q., Influence of Eutrophication on the Distribution of Total Mercury and Methylmercury in Hydroelectric Reservoirs All rights reserved. No part of this periodical may be reproduced or transmitted in any form or by any means, electronic or mechanical, including photocopying, recording, or any information storage and retrieval system, without permission in writing from the publisher. *J. Environ. Qual.* **2010**, *39*, (5), 1624-1635.
213. Fu, X.; Feng, X.; Zhu, W.; Rothenberg, S.; Yao, H.; Zhang, H., Elevated atmospheric deposition and dynamics of mercury in a remote upland forest of southwestern China. *Environmental Pollution* **2010**, *158*, (6), 2324-2333.
214. Feng, X.; Bai, W.; Shang, L.; He, T.; Qiu, G.; Yan, H., Mercury speciation and distribution in Aha Reservoir which was contaminated by coal mining activities in Guiyang, Guizhou, China. *Applied Geochemistry* **2011**, *26*, (2), 213-221.
215. Wang, Z. W.; Zhang, X. S.; Xiao, J. S.; Zhijia, C.; Yu, P. Z., Mercury fluxes and pools in three subtropical forested catchments, southwest China. *Environmental Pollution* **2009**, *157*, (3), 801-808.
216. Feng, X. B.; Jiang, H. M.; Qiu, G. L.; Yan, H. Y.; Li, G. H.; Li, Z. G., Geochemical processes of mercury in Wujiangdu and Dongfeng reservoirs, Guizhou, China. *Environmental Pollution* **2009**, *157*, (11), 2970-2984.
217. Jiang, H.; Feng, X.; Dai, Q.; Tao, F.; Liu, C., The distribution and speciation of mercury in Wujiang river. *J. Phys. IV France* **107** (2003) *679* **2003**, *107*, 679-982.
218. Qian, J.; Zhang, L.; Cao, C.; Niu, Y.; Liang, G.; Jiang, W., Distribution and pollution of mercury in the Lijiang River system (in Chinese). *Geochimica* **2010**, *39*, (4), 314-325.
219. Ding, Z.; Wang, W.; Liu, C.; Tang, Q.; Zhuang, M., Distribution and species of mercury in water and sediments from Huangpu River (in Chinese with English abstract). *Environ Sci* **2005**, *26*, (5), 62-66.
220. Jin, Y.; Wang, X.; Lu, J.; Zhang, C.; Duan, Q., Effects of modern and ancient human activities on mercury in the environment in Xi'an area, Shanxi Province, P.R. China (in Chinese). *Environ Pollut* **2008**, *153*, 342-350.
221. Fang, T.-H.; Chen, R.-Y., Mercury contamination and accumulation in sediments of the East China Sea. *Journal of Environmental Sciences* **2010**, *22*, (8), 1164-1170.
222. Shi, J. B.; Liang, L. N.; Yuan, C. G.; He, B.; Jiang, G. B., Methylmercury and total mercury in sediments collected from the East China Sea. *Bulletin of Environmental Contamination and Toxicology* **2005**, *74*, (5), 980-987.
223. Qiu, Y.-W.; Yu, K.-F.; Zhang, G.; Wang, W.-X., Accumulation and partitioning of seven trace metals in mangroves and sediment cores from three estuarine wetlands of Hainan Island, China. *Journal of Hazardous Materials* **2011**, *190*, (1-3), 631-638.
224. Ding, Z. H.; Liu, J. L.; Li, L. Q.; Lin, H. N.; Wu, H.; Hu, Z. Z., Distribution and speciation of mercury in surficial sediments from main mangrove wetlands in China. *Marine Pollution Bulletin* **2009**, *58*, (9), 1319-1325.
225. Shi, J.-b.; Ip, C. C. M.; Zhang, G.; Jiang, G.-b.; Li, X.-d., Mercury profiles in sediments of the Pearl River Estuary and the surrounding coastal area of South China. *Environmental Pollution* **2010**, *158*, (5), 1974-1979.
226. Liu, R.; Ling, M.; Wang, Y.; P., Y.; Tang, A., Mercury and other metals in surface sediment of the Bay of Laizhou and the Estuary of Yellow River, China. The 9th International Conference on Mercury as a Global Pollutant, Abstracts, Guiyang. **2009**.
227. Wang, X.; Han, J.; Xu, L.; Gao, J.; Zhang, Q., Effects of anthropogenic activities on chemical contamination within the Grand Canal, China. *Environmental Monitoring and Assessment* **2011**, *177*, (1-4), 127-139.
